# Supplementary material
Source: PubMed Central journal article supplement (PMC2883853)

# Stereochemical and Skeletal Diversity Arising from Amino Propargylic Alcohols

Daniela Pizzirani <sup>‡</sup>, Taner Kaya, <sup>†</sup>Paul A. Clemons, <sup>†</sup> and Stuart L. Schreiber <sup>†,\*</sup>

Howard Hughes Medical Institute, <sup>†</sup>Broad Institute of Harvard and MIT, Cambridge, MA 02142, <sup>‡</sup>Department of Chemistry and Chemical Biology, Harvard University, Cambridge, MA 02138; <sup>‡</sup>current address: Department of Drug Discovery and Development, Italian Institute of Technology (IIT), Via Morego 30, 16163 Genova (Italy)

## Contents:

|                                                               |            |
|---------------------------------------------------------------|------------|
| <b>I. Materials and Methods.....</b>                          | <b>S1</b>  |
| <b>II. Experimental procedures.....</b>                       | <b>S3</b>  |
| <b>III. <sup>1</sup>H and <sup>13</sup>C NMR spectra.....</b> | <b>S20</b> |
| <b>IV. X-Ray structure for compound 11a, 13a and 14a.....</b> | <b>S86</b> |

## I. Materials and Methods:

**Experimental.** Dry solvents were dispensed from a solvent purification system that passes solvents through packed columns (THF and CH<sub>2</sub>Cl<sub>2</sub>: dry neutral alumina; toluene: dry neutral alumina and Q5 reactant). Unless otherwise stated, all reagents were obtained from commercial sources and used without further purification. Infrared spectra were recorded on a Nicolet IR100 FTIR from Thermo Scientific. <sup>1</sup>H NMR spectra were recorded on Varian Unity/Inova I500 and I600 (500MHz and 600MHz) spectrometer. <sup>1</sup>H data are reported as follows: chemical shift in parts per million relative to residual protonated solvent (CHCl<sub>3</sub>: d 7.26, C<sub>6</sub>H<sub>6</sub>: d 7.15, DMSO-d<sub>6</sub>: d 2.54), multiplicity (s, singlet; d, doublet; t, triplet; q, quartet; m, multiplet; br, broadened), coupling constant (Hz), and integration. <sup>13</sup>C magnetic resonance spectra were recorded on Varian Unity/Inova I500 and (126MHz) spectrometer. <sup>13</sup>C chemical shifts are reported in parts per million relative to solvent (CHCl<sub>3</sub>: d 77.0). All <sup>13</sup>C spectra were determined with broadband decoupling. Microwave heating was performed using Explorer<sup>®</sup>-48 positions, CEM. High-resolution mass spectra were obtained through the Harvard University mass spectrometry facility. All reactions were magnetically stirred and monitored by thin-layer chromatography (TLC) using E. Merck silica gel 60 F254 pre-coated plates (0.25 mm). Flash chromatography was performed either on EM Science silica gel 60 (230–400 mesh) or using a CombiFlash companion system (Teledyne ISCO, Inc.) with pre-packed FLASH silica gel columns (Biotage, Inc.). Optical

rotations were obtained using digital polarimeter Autopol IV (Rudolph research Analytical) with a 1 mL cell and a 1 dm path length. SFC/MS chromatography was performed with a Berger analytic SFC (Waters ZQ Mass Spectrometer) using CO<sub>2</sub> and MeOH or MeOH/*i*-PrOH as the mobile phase and using a Chiralcel® OD-H column or a Chiralpak® AD-H column purchased from Chiral Technology Inc. (column length: 4.6x250mm, pore size: 5µm).

**Computational.** We used Pipeline Pilot (Accelrys, Inc.; San Diego, CA, USA) to generate SMILES<sup>1</sup> representations of all four possible stereoisomers (**a-d**) for each of the compounds studied (**1-14**). 3D models were built for each stereoisomer structure and then expanded to a set of conformers by a conformational sampling run, both performed in Molecular Operating Environment (MOE 2007.09; Chemical Computing Group; Montreal, QC, Canada) using default sampling and energy-minimization parameters and keeping only conformers with free energies within 2 kcal of the global minimum of the search. Resulting conformers were again filtered after being manually inspected for spatial defects, and unfavorable interactions.

For each compound we kept unique conformers of diastereomeric pairs (**a** and **b**) of low free energy. Because enantiomeric compounds have identical PMI ratios, we considered conformers of both **a** and **d** as “**a**”, **b** and **c** as “**b**” for PMI analysis. In order to retain the geometry of common fragments present in **1-14** throughout the 3D-models, we used the lowest energy conformer of **1** as a seed structure for new models of diastereomeric pairs of **5**, **6**, **8**, **10**, and **11**. By dialing in actual dihedral angles of **1** and performing local minimization on ring-forming atoms of the new product structures, we built 3D structures, for all **a**, that are of comparable geometry for the common molecular fragment in these compounds. We then performed an all-atom local minimization with default minimization parameters in MOE where heavy atoms were constrained to their current positions using a quadratic force constant to keep the resulting minimum close to the original coordinates. New structures of **6** and **11** were then used as seed structures for compound sets **7** and **9**, and **12**, **13**, **14**, respectively.

In our implementation of Sauer and Schwartz<sup>2</sup> PMI ratio method, we calculated ratios of the smallest and medium eigenvalues of the diagonalized mass tensor to the largest (i.e.,  $X = \mathbf{I}_{\text{small}}/\mathbf{I}_{\text{large}}$ ,  $Y = \mathbf{I}_{\text{medium}}/\mathbf{I}_{\text{large}}$ ). The Y coordinate of these ratios was then scaled by  $\sqrt{3}$  to produce an equilateral PMI space, to allow meaningful Euclidean distances between compounds to be computed in the resulting PMI space.

## II. Experimental procedures

**Scheme 1s.** Synthetic route to derivatives (*R*)-**2a** and (*S*)-**2b**.<sup>a</sup>

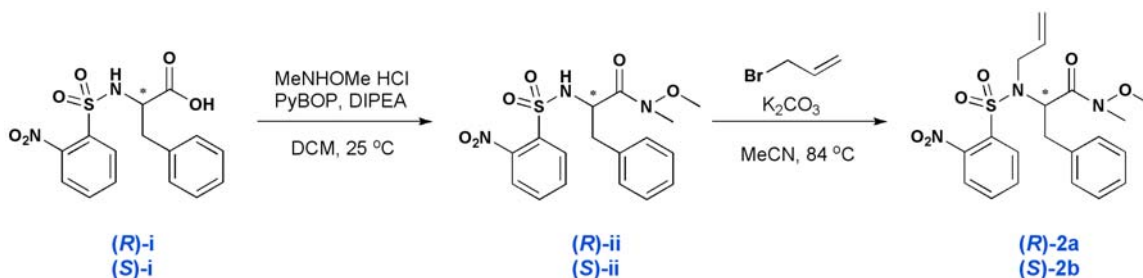

<sup>a</sup> Compounds (*R*)-**i** and (*S*)-**i** were prepared from D- and L-phenylalanine respectively by the known procedure.<sup>3</sup> Compound (*S*)-**i** is a known compound.<sup>4</sup>

### (*R*)-2-(2-nitrophenylsulfonamido)-3-phenylpropanoic acid (*R*)-**i**

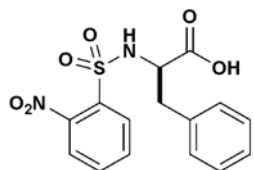

Yield 86% (white solid); IR (neat,  $\text{cm}^{-1}$ )  $\nu = 3321, 3095, 3030, 1727, 1539,$   
 $1355, 1168, 1103$ ;  $[\alpha]_{\text{D}}^{20} = + 81.8 \text{ cm}^3 \text{ g}^{-1} \text{ dm}^{-1}$  ( $c = 0.49 \text{ g cm}^3, \text{CHCl}_3$ );

<sup>1</sup>H NMR (500 MHz,  $\text{CDCl}_3$ )  $\delta = 7.93$  (d,  $J = 8.0$ , 1H),  $7.83$  (d,  $J = 8.0$ , 1H),  
 $7.68$  (t,  $J = 7.5$ , 1H),  $7.64$  (t,  $J = 7.5$ , 1H),  $7.22 - 7.18$  (m, 3H),  $7.13 - 7.11$   
(m, 2H),  $5.94$  (d,  $J = 8.5$ , 1H),  $4.48$  (ddd,  $J = 5.0, 7.5, 13.5$ , 1H),  $3.21$  (dd,  $J = 5.0, 14.0$ , 1H),  $3.05$  (dd,  
 $J = 7.5, 14.0$ , 1H); <sup>13</sup>C NMR (126 MHz,  $\text{CDCl}_3$ )  $\delta = 175.4, 147.2, 134.4, 133.9, 133.6, 133.0,$   
 $130.2, 129.2, 128.7, 127.5, 125.6, 57.4, 38.6$ . HRMS (EI) calcd. for  $[\text{C}_{15}\text{H}_{14}\text{N}_2\text{O}_6\text{S}]$  ( $\text{M}+\text{H}$ )<sup>+</sup>  
 $351.0645$ , found  $351.0642$ .

### General procedure for amidation

To a solution of (*R*)- or (*S*)-2-(2-nitrophenylsulfonamido)-3-phenylpropanoic acid (1 equiv.), (*R*)-**i** or (*S*)-**i** respectively, *N,N*-diisopropylethylamine (1 equiv.) in dry dichloromethane (0.2M) at 0 °C, benzotriazol-1-yloxy tripyrrolidinophosphonium hexafluorophosphate (pyBOP, 1.1 equiv.), *N,O*-dimethylhydroxylamine hydrochloride (2 equiv.) and *N,N*-diisopropylethylamine (2 equiv.) were added. The resulting solution was stirred for 30 min at 0 °C and then it was allowed to warm to room temperature and stirred under nitrogen for 4h. The mixture was diluted with dichloromethane, quenched with 3N aqueous HCl and the aqueous layer was extracted with dichloromethane. The combined organic phases were washed with saturated aqueous  $\text{NaHCO}_3$ , brine, dried over sodium sulfate, filtered and evaporated under reduced pressure. The resulting residue was purified by silica gel chromatography (Hex/EtOAc 1:1).

### (*R*)-*N*-methoxy-*N*-methyl-2-(2-nitrophenylsulfonamido)-3-phenylpropanamide (*R*)-**ii**

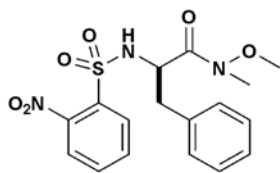

Yield 83% (pale yellow solid); IR (neat,  $\text{cm}^{-1}$ )  $\nu = 3300, 3095, 3028, 2939, 1662, 1541, 1441, 1412, 1385, 1349, 1168, 1079$ ;  $[\alpha]_{\text{D}}^{20} = +12.1 \text{ cm}^3 \text{ g}^{-1} \text{ dm}^{-1}$  ( $c = 0.43 \text{ g cm}^3, \text{CHCl}_3$ );  $^1\text{H NMR}$  (500 MHz,  $\text{CDCl}_3$ )  $\delta = 7.87$  (d,  $J=8.0$ , 1H),  $7.84$  (d,  $J=8.0$ , 1H),  $7.65$  (t,  $J=7.5$ , 1H),  $7.59$  (t,  $J=7.5$ , 1H),  $7.21 - 7.12$  (m, 5H),  $6.23$  (d,  $J=9.0$ , 1H),  $4.88 - 4.83$  (m, 1H),  $3.55$  (s, 3H),  $3.06$  (dd,  $J=6.0, 13.5$ , 1H),  $2.96$  (s, 3H),  $2.91$  (dd,  $J=7.0, 13.5$ , 1H);  $^{13}\text{C NMR}$  (126 MHz,  $\text{CDCl}_3$ )  $\delta = 170.60, 147.53, 135.66, 134.55, 133.20, 132.52, 129.98, 129.44, 128.44, 127.12, 125.47, 61.49, 55.36, 39.42, 31.99$ ; HRMS (EI) calcd. for  $[\text{C}_{17}\text{H}_{19}\text{N}_3\text{O}_6\text{S}]$  (M+H) $^+$  394.1067, found 394.1069.

**(S)-N-methoxy-N-methyl-2-(2-nitrophenylsulfonamido)-3-phenylpropanamide (S-ii)**

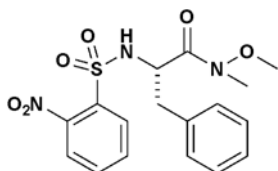

Yield 83% (pale yellow solid); IR (neat,  $\text{cm}^{-1}$ )  $\nu = 3300, 3095, 3028, 2938, 1662, 1541, 1441, 1412, 1385, 1350, 1168, 1079$ ;  $[\alpha]_{\text{D}}^{20} = -12.7 \text{ cm}^3 \text{ g}^{-1} \text{ dm}^{-1}$  ( $c = 0.33 \text{ g cm}^3, \text{CHCl}_3$ );  $^1\text{H NMR}$  (500 MHz,  $\text{CDCl}_3$ )  $\delta = 7.87$  (d,  $J=8.0$ , 1H),  $7.83$  (d,  $J=8.0$ , 1H),  $7.65$  (t,  $J=7.5$ , 1H),  $7.59$  (t,  $J=7.5$ , 1H),  $7.19 - 7.12$  (m, 5H),  $6.25$  (m, 1H),  $4.85 - 4.84$  (m, 1H),  $3.55$  (s, 3H),  $3.06$  (dd,  $J=6.0, 13.5$ , 1H),  $2.96$  (s, 3H),  $2.90$  (dd,  $J=7.0, 13.5$ , 1H);  $^{13}\text{C NMR}$  (126 MHz,  $\text{CDCl}_3$ )  $\delta = 170.5, 147.4, 135.6, 134.5, 133.2, 132.5, 129.9, 129.3, 128.4, 127.0, 125.4, 61.4, 55.3, 39.3, 31.9$ ; HRMS (EI) calcd. for  $[\text{C}_{17}\text{H}_{19}\text{N}_3\text{O}_6\text{S}]$  (M+H) $^+$  394.1067, found 394.1064.

**General procedure for N-Allylation**

In a 250 mL pear flask, (*R*)- or (*S*)-*N*-methoxy-*N*-methyl-2-(2-nitrophenylsulfonamido)-3-phenylpropanamide (1 equiv.), (**R-ii**) or (**S-ii**) respectively, was dissolved in acetonitrile (0.2M) to give a pale yellow solution. Potassium carbonate (1.2 equiv.) and 3-bromoprop-1-ene (1.2 equiv.) were added and the resulting suspension was heated to  $84^\circ\text{C}$  and stirred under nitrogen for 3h. The solvent was evaporated under reduced pressure and the residue taken up with water and dichloromethane. The two phases were separated and the aqueous layer was extracted with dichloromethane. The combined organic phases were dried over sodium sulfate, filtered and evaporated under reduced pressure. The resulting residue was purified by silica gel chromatography (Hex/EtOAc 3:2).

**(R)-2-(N-allyl-2-nitrophenylsulfonamido)-N-methoxy-N-methyl-3-phenylpropanamide (2a)**

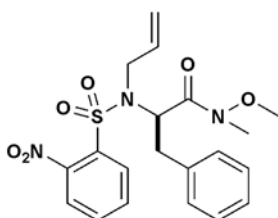

Yield 97% (yellow oil); IR (neat,  $\text{cm}^{-1}$ )  $\nu = 3088, 3028, 2940, 1665, 1544, 1440, 1372, 1165$ ;  $[\alpha]_{\text{D}}^{20} = +50.6 \text{ cm}^3 \text{ g}^{-1} \text{ dm}^{-1}$  ( $c = 0.65 \text{ g cm}^3$ ,

CHCl<sub>3</sub>); SFC: Chiralcel® OD-H column; 5% MeOH, 95% sfCO<sub>2</sub>,  $t_R^{(major)} = 12$  min, area = 100% (>99% ee) (racemic compound  $t_R = 12.18$  min, 13.46 min); <sup>1</sup>H NMR (500 MHz, CDCl<sub>3</sub>)  $\delta = 7.92$  (d,  $J=8.0$ , 1H), 7.68 – 7.64 (m, 1H), 7.61 – 7.57 (m, 2H), 7.27 – 7.18 (m, 5H), 5.89 – 5.81 (m, 1H), 5.30 – 5.23 (m, 2H), 5.08 (d,  $J=10.0$ , 1H), 4.45 (dd,  $J=6.5$ , 16.5, 1H), 4.30 (dd,  $J=6.0$ , 16.5, 1H), 3.34 (m, 4H), 3.05 – 2.93 (m, 4H); <sup>13</sup>C NMR (126 MHz, CDCl<sub>3</sub>)  $\delta = 170.0$ , 148.2, 136.3, 135.3, 133.9, 133.3, 131.4, 130.9, 129.4, 128.4, 126.8, 124.0, 117.6, 61.2, 56.5, 48.2, 36.9, 31.7; HRMS (EI) calcd. for [C<sub>20</sub>H<sub>23</sub>N<sub>3</sub>O<sub>6</sub>S] (M+H)<sup>+</sup> 434.1380, found 434.1388.

**(S)-2-(N-allyl-2-nitrophenylsulfonamido)-N-methoxy-N-methyl-3-phenylpropanamide (2b)**

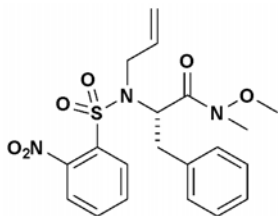

Yield 98% (yellow oil); IR (neat, cm<sup>-1</sup>)  $\nu = 3088$ , 3028, 2940, 1665, 1544, 1440, 1372, 1165, 1127, 1062;  $[\alpha]_D^{20} = -47.3$  cm<sup>3</sup> g<sup>-1</sup> dm<sup>-1</sup> (c = 0.52 g cm<sup>3</sup>, CHCl<sub>3</sub>); SFC: Chiralcel® OD-H column; 5% MeOH, 95% sfCO<sub>2</sub>,  $t_R^{(major)} = 13.33$  min, area = 100% (>99% ee) (racemic compound  $t_R = 12.18$  min, 13.46 min); <sup>1</sup>H NMR (500 MHz, CDCl<sub>3</sub>)  $\delta = 7.91$  (d,

$J=8.0$ , 1H), 7.65 – 7.56 (m, 3H), 7.27 – 7.18 (m, 5H), 5.83 (ddd,  $J=6.0$ , 11.0, 16.5, 1H), 5.29 – 5.22 (m, 2H), 5.07 (d,  $J=10$ , 1H), 4.43 (dd,  $J=5.5$ , 16.5, 1H), 4.29 (dd,  $J=5.5$ , 16.5, 1H), 3.40 – 3.24 (m, 4H), 3.01 – 2.93 (m, 4H); <sup>13</sup>C NMR (126 MHz, CDCl<sub>3</sub>)  $\delta = 170.0$ , 148.2, 136.4, 135.3, 134.0, 133.3, 131.4, 130.9, 129.5, 128.4, 126.9, 124.0, 117.6, 61.2, 56.6, 48.2, 36.9, 31.7; HRMS (EI) calcd. for [C<sub>20</sub>H<sub>23</sub>N<sub>3</sub>O<sub>6</sub>S] (M+H)<sup>+</sup> 434.1380, found 434.1386.

**General procedure for the preparation of  $\alpha,\beta$ -acetylenic ketones 3a-b**

In a flame-dried flask, triethyl(ethynyl)silane (2.8 equiv.) was dissolved in dry THF (0.5M), the resulting colorless solution was cooled to – 78 °C and *n*-butyllithium (2.5 M in hexanes, 2.6 equiv.) was added dropwise. (NOTE: recently opened *n*-butyllithium is recommended). The reaction mixture was stirred under nitrogen for 1h, allowing the temperature to rise up to – 50 °C. Then, the reaction was cooled to – 78 °C and a solution of Weinreb amide derivative **2a** or **2b** (1 equiv.) in dry THF (0.5M) was added. The reaction mixture was stirred under nitrogen for 75 min allowing the temperature to rise up to – 45 °C. The reaction mixture was quenched with saturated aqueous NH<sub>4</sub>Cl. The aqueous layer was extracted with diethyl ether and the combined organic phases were washed with brine, dried over sodium sulfate, filtered and evaporated under reduced pressure. The resulting residue was purified by silica gel chromatography (Hex/EtOAc 4:1).

**(R)-N-allyl-2-nitro-N-(3-oxo-1-phenyl-5-(triethylsilyl)pent-4-yn-2-yl)benzenesulfonamide**

**(3a)**

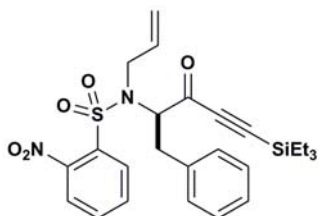

Yield 72% (yellow oil); IR (neat,  $\text{cm}^{-1}$ )  $\nu = 3089, 3029, 2957, 2913, 2876, 2147, 1681, 1545, 1371, 1167, 1008$ ;  $[\alpha]_{\text{D}}^{20} = -47.1 \text{ cm}^3 \text{ g}^{-1} \text{ dm}^{-1}$  ( $c = 0.41 \text{ g cm}^3, \text{CHCl}_3$ ); SFC: Chiralpak<sup>®</sup> AD-H (2 columns); 10% MeOH/*i*-PrOH (4:1), 95% sfCO<sub>2</sub>,  $t_{\text{R}}^{(\text{major})} = 4.32 \text{ min}$ , area = 98.38 % (97% ee) (racemic compound  $t_{\text{R}} = 3.81 \text{ min}, 4.31 \text{ min}$ ); <sup>1</sup>H NMR (500 MHz, CDCl<sub>3</sub>)  $\delta = 7.79 - 7.77$  (m, 1H), 7.65 – 7.62 (m, 1H), 7.57 – 7.52 (m, 2H), 7.29 – 7.24 (m, 4H), 7.23 – 7.21 (m, 1H), 5.80 (ddd,  $J=6.0, 11.0, 16.5$ , 1H), 5.20 (d,  $J=16.5$ , 1H), 5.11 (d,  $J=10.0$ , 1H), 5.09 – 5.07 (m, 1H), 4.10 (dd,  $J=6.5, 16.5$ , 1H), 3.95 (dd,  $J=6.5, 16.5$ , 1H), 3.60 (dd,  $J=6.0, 14.5$ , 1H), 3.02 (dd,  $J=8.5, 14.5$ , 1H), 1.00 (t,  $J=8.0$ , 9H), 0.67 (q,  $J=8.0$ , 6H); <sup>13</sup>C NMR (126 MHz, CDCl<sub>3</sub>)  $\delta = 183.9, 136.3, 134.5, 133.6, 133.3, 131.5, 131.1, 129.2, 128.6, 126.9, 124.0, 118.8, 101.7, 101.7, 68.6, 49.4, 34.8, 7.2, 3.6$ ; HRMS (EI) calcd. for [C<sub>26</sub>H<sub>32</sub>N<sub>2</sub>O<sub>5</sub>SSi] (M+H)<sup>+</sup> 513.1874, found 513.1869.

**(S)-N-allyl-2-nitro-N-(3-oxo-1-phenyl-5-(triethylsilyl)pent-4-yn-2-yl)benzenesulfonamide**

**(3b)**

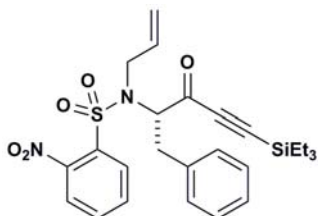

Yield 79% (yellow oil); IR (neat,  $\text{cm}^{-1}$ )  $\nu = 3089, 3029, 2957, 2913, 2876, 2148, 1681, 1545, 1371, 1167, 1008$ ;  $[\alpha]_{\text{D}}^{20} = +42.5 \text{ cm}^3 \text{ g}^{-1} \text{ dm}^{-1}$  ( $c = 0.53 \text{ g cm}^3, \text{CHCl}_3$ ); SFC: Chiralpak<sup>®</sup> AD-H (2 columns); 10% MeOH/*i*-PrOH (4:1), 95% sfCO<sub>2</sub>,  $t_{\text{R}}^{(\text{major})} = 3.85 \text{ min}$ , area = 98 % (96% ee) (racemic compound  $t_{\text{R}} = 3.81 \text{ min}, 4.31 \text{ min}$ ); <sup>1</sup>H NMR (500 MHz, CDCl<sub>3</sub>)  $\delta = 7.79 - 7.77$  (m, 1H), 7.65 – 7.62 (m, 1H), 7.57 – 7.52 (m, 2H), 7.27 – 7.24 (m, 4H), 7.23 – 7.21 (m, 1H), 5.81 (ddd,  $J=6.0, 11.0, 16.5$ , 1H), 5.21 (d,  $J=16.5$ , 1H), 5.11 (d,  $J=10.5$ , 1H), 5.09 – 5.07 (m, 1H), 4.10 (dd,  $J=6.5, 16.5$ , 1H), 3.95 (dd,  $J=6.5, 16.5$ , 1H), 3.60 (dd,  $J=6.0, 14.5$ , 1H), 3.02 (dd,  $J=8.0, 14.5$ , 1H), 1.00 (t,  $J=8.0$ , 9H), 0.67 (q,  $J=8.0$ , 6H); <sup>13</sup>C NMR (126 MHz, CDCl<sub>3</sub>)  $\delta = 183.9, 136.3, 134.5, 133.5, 133.3, 131.5, 131.1, 129.2, 128.5, 126.9, 124.0, 118.7, 101.7, 101.6, 68.7, 49.4, 34.8, 7.2, 3.6$ ; HRMS (EI) calcd. for [C<sub>26</sub>H<sub>32</sub>N<sub>2</sub>O<sub>5</sub>SSi] (M+Na)<sup>+</sup> 535.1693, found 535.1696.

**General procedure for diastereoselective reduction of  $\alpha,\beta$ -acetylenic ketones 3a-b**

In a flame-dried flask, (*R*)- or (*S*)-1-methyl-3,3-diphenylhexahydropyrrolo[1,2-*c*][1,3,2]oxazaborolidine (1.0 M in toluene, 1.1 equiv.) and borane tetrahydrofuran complex solution (1.0

M in THF, 1.1 equiv.) were dissolved in dry THF at 0°C and the resulting colorless solution was stirred for 30 min under nitrogen. The mixture was cooled to – 78 °C and the appropriate enantiomer of the substrate (1 equiv.), dissolved in dry THF (0.1M), was slowly added by syringe pump (1.6 mL/h). The temperature was maintained between – 70 °C and – 50 °C. The reaction mixture was cautiously quenched by addition of MeOH at 0 °C. After 30 min of stirring at room temperature, the mixture was concentrated under reduced pressure. The residue was purified by silica gel chromatography (Hex/EtOAc 4:1).

***N*-allyl-*N*-((2*R*,3*S*)-3-hydroxy-1-phenyl-5-(triethylsilyl)pent-4-yn-2-yl)-2-nitrobenzene sulfonamide (4a)**

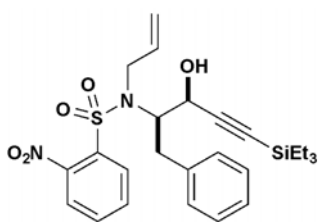

Yield 80% (inseparable mixture of diastereomers, *anti/syn* = 9:91) (yellow oil); IR (neat, cm<sup>-1</sup>)  $\nu$  = 3523, 3087, 3028, 2955, 2912, 2875, 2169, 1544, 1372, 1350, 1163, 1005;  $[\alpha]_D^{20}$  = + 3.3 cm<sup>3</sup> g<sup>-1</sup> dm<sup>-1</sup> (c = 0.12 g cm<sup>3</sup>, CHCl<sub>3</sub>); <sup>1</sup>H NMR (500 MHz, CDCl<sub>3</sub>)  $\delta$  = 7.92 (d, *J*=8, 1H), 7.65 – 7.62 (m, 1H), 7.58 – 7.53 (m, 2H), 7.21 – 7.19 (m, 4H), 7.18 – 7.16 (m, 1H), 5.95 (ddd, *J*=6.0, 11.0, 16.5, 1H), 5.32 – 5.28 (m, 2H), 5.14 (d, *J*=10.0, 1H), 4.56 (dd, *J*=7.0, 16.5, 1H), 4.46 – 4.45 (m, 1H), 4.30 – 4.25 (m, 2H), 4.27 – 4.24 (m, 1H), 3.20 (dd, *J*=8.5, 14.5, 1H), 3.12 (dd, *J*=6.5, 14.5, 1H), 2.42 (d, *J*=7.0, 1H), 1.03 (t, *J*=8.0, 9H), 0.65 (q, *J*=8.0, 6H); <sup>13</sup>C NMR (126 MHz, CDCl<sub>3</sub>)  $\delta$  = 137.0, 135.8, 133.5, 133.4, 131.7, 131.6, 129.1, 128.5, 128.4, 126.8, 124.1, 117.8, 104.3, 91.3, 63.6, 63.1, 47.5, 36.0, 7.4, 4.1; HRMS (EI) calcd. for [C<sub>26</sub>H<sub>34</sub>N<sub>2</sub>O<sub>5</sub>SSi] (M+H)<sup>+</sup> 515.2030, found 515.2030.

***N*-allyl-*N*-((2*R*,3*R*)-3-hydroxy-1-phenyl-5-(triethylsilyl)pent-4-yn-2-yl)-2-nitrobenzene sulfonamide (4b)**

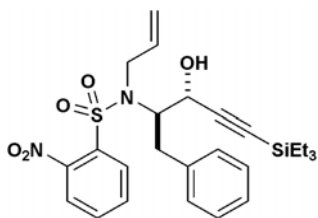

Yield 99% (inseparable mixture of diastereomers, *anti/syn* = 90:10) (yellow oil); IR (neat, cm<sup>-1</sup>)  $\nu$  = 3525, 3087, 3028, 2955, 2912, 2875, 2171, 1545, 1371, 1352, 1162, 1006;  $[\alpha]_D^{20}$  = – 75.8 cm<sup>3</sup> g<sup>-1</sup> dm<sup>-1</sup> (c = 0.12 g cm<sup>3</sup>, CHCl<sub>3</sub>); <sup>1</sup>H NMR (500 MHz, CDCl<sub>3</sub>)  $\delta$  = 7.58 (d, *J*=8.0, 1H), 7.56 – 7.53 (m, 1H), 7.46 (d, *J*=8.0, 1H), 7.42 – 7.38 (m, 1H), 7.13 – 7.06 (m, 5H), 6.01 (ddd, *J*=6.0, 10.0, 16.5, 1H), 5.31 (d, *J*=17.5, 1H), 5.18 (d, *J*=10.0, 1H), 4.45 (m, 1H), 4.30 – 4.25 (m, 2H), 4.04 (dd, *J*=7.5, 16.5, 1H), 3.29 (dd, *J*=10.0, 15.0, 1H), 2.88 (dd, *J*=10.0, 15.0, 1H), 2.73 (br, 1H), 1.01 (t, *J*=8.0, 9H), 0.64 (q, *J*=8.0, 6H); <sup>13</sup>C NMR (126 MHz, CDCl<sub>3</sub>)  $\delta$  = 147.8, 137.0, 135.7, 133.5, 133.1, 131.5, 131.0, 129.1, 128.4, 126.6, 124.0,

118.1, 105.3, 90.0, 65.3, 64.0, 47.7, 34.8, 7.4, 4.1; HRMS (EI) calcd. for  $[C_{26}H_{34}N_2O_5SSi]$  (M+H)<sup>+</sup> 515.2030, found 515.2032.

***N*-allyl-*N*-((2*S*,3*S*)-3-hydroxy-1-phenyl-5-(triethylsilyl)pent-4-yn-2-yl)-2-nitrobenzene sulfonamide (4c)**

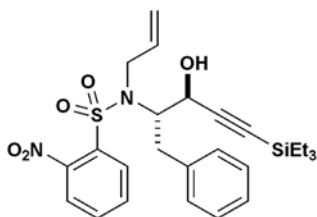

Yield 87% (inseparable mixture of diastereomers, *anti/syn* = 90:10) (yellow oil); IR (neat,  $cm^{-1}$ )  $\nu$  = 3523, 3087, 3028, 2955, 2924, 2875, 2172, 1544, 1372, 1162, 1006;  $[\alpha]_D^{20}$  = + 68.3  $cm^3 g^{-1} dm^{-1}$  ( $c$  = 0.36  $g cm^3$ ,  $CHCl_3$ );  $^1H$  NMR (500 MHz,  $CDCl_3$ )  $\delta$  = 7.58 – 7.53 (m, 2H), 7.47 (d,  $J=8.0$ , 1H), 7.41 – 7.38 (m, 1H), 7.14 – 7.06 (m, 5H), 6.05 – 5.97 (m, 1H), 5.33 – 5.28 (m, 1H), 5.18 (d,  $J=10.0$ , 1H), 4.48 – 4.45 (m, 1H), 4.29 – 4.25 (m, 2H), 4.05 (dd,  $J=7.5$ , 16.5, 1H), 3.29 (dd,  $J=5.0$ , 15.0, 1H), 2.88 (dd,  $J=10.0$ , 15.0, 1H), 2.73 (d,  $J=8.0$ , 1H), 1.01 (t,  $J=8.0$ , 9H), 0.64 (q,  $J=8.0$ , 6H);  $^{13}C$  NMR (126 MHz,  $CDCl_3$ )  $\delta$  = 147.7, 137.0, 135.7, 133.5, 133.1, 131.5, 130.9, 129.1, 128.4, 126.6, 124.0, 118.1, 105.3, 90.0, 65.3, 63.9, 47.7, 34.8, 7.4, 4.1; HRMS (EI) calcd. for  $[C_{26}H_{34}N_2O_5SSi]$  (M+H)<sup>+</sup> 515.2030, found 515.2031.

***N*-allyl-*N*-((2*S*,3*R*)-3-hydroxy-1-phenyl-5-(triethylsilyl)pent-4-yn-2-yl)-2-nitrobenzene sulfonamide (4d)**

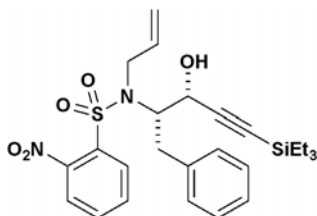

Yield 80% (inseparable mixture of diastereomers, *anti/syn* = 9:91) (yellow oil); IR (neat,  $cm^{-1}$ )  $\nu$  = 3527, 2955, 2911, 2875, 2161, 1544, 1371, 1350, 1163, 1005;  $[\alpha]_D^{20}$  = – 4.0  $cm^3 g^{-1} dm^{-1}$  ( $c$  = 0.65  $g cm^3$ ,  $CHCl_3$ );  $^1H$  NMR (500 MHz,  $CDCl_3$ )  $\delta$  = 7.92 (d,  $J=8.0$ , 1H), 7.65 – 7.62 (m, 1H), 7.57 – 7.53 (m, 2H), 7.21 – 7.19 (m, 4H), 7.18 – 7.16 (m, 1H), 5.96 (ddd,  $J=6.0$ , 11.0, 16.5, 1H), 5.33 – 5.27 (m, 1H), 5.15 (d,  $J=10.0$ , 1H), 4.57 (dd,  $J=7.0$ , 16.5, 1H), 4.46 – 4.44 (m, 1H), 4.30 – 4.25 (m, 3H), 3.19 (dd,  $J=8.5$ , 14.5, 1H), 3.12 (dd,  $J=6.5$ , 14.5, 1H), 2.42 (d,  $J=6.5$ , 1H), 1.04 (t,  $J=8.0$ , 9H), 0.65 (q,  $J=8.0$ , 6H);  $^{13}C$  NMR (126 MHz,  $CDCl_3$ )  $\delta$  = 148.1, 137.3, 136.1, 133.8, 133.7, 132.0, 131.8, 129., 128.8, 127.0, 124.4, 118.1, 104.6, 91.5, 63.9, 63.3, 47.7, 36.2, 7.7, 4.4; HRMS (EI) calcd. for  $[C_{26}H_{34}N_2O_5SSi]$  (M+H)<sup>+</sup> 515.2030, found 515.2020.

**General procedure for triethylsilyl group (TES) cleavage**



In a flask, the TES-protected propargylic alcohol was dissolved in wet THF (0.1M) and a 1:1 molar ratio tetrabutylammonium fluoride (TBAF)/acetic acid solution (1.6 equiv.) was added at 0 °C. The reaction mixture was stirred under nitrogen for 5h. The mixture was diluted with EtOAc and quenched with saturated aqueous NH<sub>4</sub>Cl. The two phases were separated and the aqueous layer was extracted with EtOAc. The combined organic phases were washed with brine, dried over sodium sulfate, filtered and evaporated under reduced pressure. The resulting residue was purified by silica gel chromatography (Hex/EtOAc 3:2).

***N*-allyl-*N*-((2*R*,3*S*)-3-hydroxy-1-phenylpent-4-yn-2-yl)-2-nitrobenzenesulfonamide (1a)**

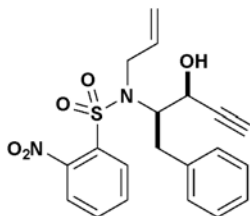

Yield 90% (pale yellow oil); IR (neat, cm<sup>-1</sup>)  $\nu$  = 3519, 3288, 3088, 3028, 2931, 2161, 1543, 1372, 1346, 1162, 1062;  $[\alpha]_D^{20}$  = + 15.5 cm<sup>3</sup> g<sup>-1</sup> dm<sup>-1</sup> (c = 0.52 g cm<sup>3</sup>, CHCl<sub>3</sub>); <sup>1</sup>H NMR (500 MHz, CDCl<sub>3</sub>)  $\delta$  = 7.86 (d, *J*=8.0, 1H), 7.63 (t, *J*=7.5, 1H), 7.56 – 7.52 (m, 2H), 7.21 – 7.14 (m, 5H), 5.95 (ddd, *J*=6.0, 11.0, 16.5, 1H), 5.31 (d, *J*=16.5, 1H), 5.16 (d, *J*=10.0, 1H), 4.52 – 4.50 (m, 1H), 4.46 (dd, *J*=6.5, 16.5, 1H), 4.33 – 4.28 (m, 1H), 4.24 (dd, *J*=6.0, 16.5, 1H), 3.20 (dd, *J*=8.0, 14.0, 1H), 3.10 (dd, *J*=7.0, 14.0, 1H), 2.65 (d, *J*=2.5, 1H), 2.51 (d, *J*=7.0, 1H); <sup>13</sup>C NMR (126 MHz, CDCl<sub>3</sub>)  $\delta$  = 147.7, 136.9, 135.7, 133.5, 133.4, 131.6, 129.1, 128.5, 128.4, 126.8, 124.1, 118.1, 81.7, 76.4, 63.4, 63.2, 47.5, 35.4; HRMS (EI) calcd. for [C<sub>20</sub>H<sub>20</sub>N<sub>2</sub>O<sub>5</sub>S] (M+H)<sup>+</sup> 401.1165, found 401.1158.

***N*-allyl-*N*-((2*R*,3*R*)-3-hydroxy-1-phenylpent-4-yn-2-yl)-2-nitrobenzenesulfonamide (1b)**

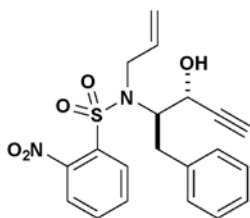

Yield 96% (white crystals). The purified compound was crystallized from CHCl<sub>3</sub>/Hexanes. IR (neat, cm<sup>-1</sup>)  $\nu$  = 3523, 3289, 3088, 3028, 2930, 2118, 1543, 1372, 1347, 1162, 1063;  $[\alpha]_D^{20}$  = - 51.5 cm<sup>3</sup> g<sup>-1</sup> dm<sup>-1</sup> (c = 0.40 g cm<sup>3</sup>, CHCl<sub>3</sub>); <sup>1</sup>H NMR (500 MHz, CDCl<sub>3</sub>)  $\delta$  = 7.65 (d, *J*=8.0, 1H), 7.57 (t, *J*=7.5, 1H), 7.49 – 7.42 (m, 2H), 7.17 – 7.07 (m, 5H), 6.07 – 5.98 (m, 1H), 5.33 (d, *J*=17.5, 1H), 5.20 (d, *J*=10.0, 1H), 4.45 – 4.43 (m, 1H), 4.34 – 4.27 (m, 2H), 4.08 (dd, *J*=8.0, 16.5, 1H), 3.25 (dd, *J*=7.5, 14.0, 1H), 2.90 (dd, *J*=10.0, 15.0, 1H), 2.83 (br, 1H), 2.53 (d, *J*=2.5, 1H); <sup>13</sup>C NMR (126 MHz, CDCl<sub>3</sub>)  $\delta$  = 147.7, 136.8, 135.7, 133.4, 133.2, 131.5, 131.1, 129.1, 128.4, 126.7, 124.0, 118.2, 82.6, 75.3, 64.8, 63.2, 48.0, 34.9; HRMS (EI) calcd. for [C<sub>20</sub>H<sub>20</sub>N<sub>2</sub>O<sub>5</sub>S] (M+H)<sup>+</sup> 401.1165, found 401.1164.

***N*-allyl-*N*-((2*S*,3*S*)-3-hydroxy-1-phenylpent-4-yn-2-yl)-2-nitrobenzenesulfonamide (1c)**

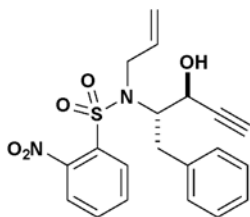

Yield 89% (white crystals). The purified compound was crystallized from  $\text{CHCl}_3/\text{Hexanes}$ . IR (neat,  $\text{cm}^{-1}$ )  $\nu = 3523, 3289, 3089, 3028, 2930, 2118, 1543, 1372, 1347, 1162, 1063$ ;  $[\alpha]_{\text{D}}^{20} = + 52.5 \text{ cm}^3 \text{ g}^{-1} \text{ dm}^{-1}$  ( $c = 0.52 \text{ g cm}^3, \text{CHCl}_3$ );  $^1\text{H NMR}$  (500 MHz,  $\text{CDCl}_3$ )  $\delta = 7.64$  (d,  $J=8.0, 1\text{H}$ ), 7.56 (t,  $J=7.5, 1\text{H}$ ), 7.48 – 7.42 (m, 2H), 7.15 – 7.08 (m, 5H), 6.06 – 5.98 (m, 1H), 5.32 (d,  $J=17.5, 1\text{H}$ ), 5.20 (d,  $J=10.0, 1\text{H}$ ), 4.45 – 4.43 (m, 1H), 4.33 – 4.29 (m, 2H), 4.08 (dd,  $J=8.0, 16.5, 1\text{H}$ ), 3.26 (dd,  $J=5.0, 14.0, 1\text{H}$ ), 2.90 (dd,  $J=10.0, 15.0, 1\text{H}$ ), 2.90 – 2.87 (m, 1H), 2.53 (d,  $J=2.5, 1\text{H}$ );  $^{13}\text{C NMR}$  (126 MHz,  $\text{CDCl}_3$ )  $\delta = 147.7, 136.8, 135.7, 133.4, 133.2, 131.5, 131.1, 129.1, 128.4, 126.7, 124.0, 118.2, 82.5, 75.3, 64.8, 63.1, 47.9, 34.9$ ; HRMS (EI) calcd. for  $[\text{C}_{20}\text{H}_{20}\text{N}_2\text{O}_5\text{S}] (\text{M}+\text{H})^+$  401.1165, found 401.1160.

***N*-allyl-*N*-((2*S*,3*R*)-3-hydroxy-1-phenylpent-4-yn-2-yl)-2-nitrobenzenesulfonamide (1d)**

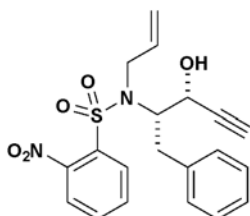

Yield 92% (pale yellow oil); IR (neat,  $\text{cm}^{-1}$ )  $\nu = 3524, 3288, 3088, 3028, 2917, 2117, 1543, 1372, 1347, 1162, 1062$ ;  $[\alpha]_{\text{D}}^{20} = - 15.2 \text{ cm}^3 \text{ g}^{-1} \text{ dm}^{-1}$  ( $c = 0.47 \text{ g cm}^3, \text{CHCl}_3$ );  $^1\text{H NMR}$  (500 MHz,  $\text{CDCl}_3$ )  $\delta = 7.87$  (d,  $J=8, 1\text{H}$ ), 7.63 (t,  $J=7.5, 1\text{H}$ ), 7.56 – 7.52 (m, 2H), 7.21 – 7.15 (m, 5H), 5.95 (ddd,  $J=6, 11, 16.5, 1\text{H}$ ), 5.32 (d,  $J=17, 1\text{H}$ ), 5.16 (d,  $J=10, 1\text{H}$ ), 4.51 (m, 1H), 4.46 (dd,  $J=6.5, 16.5, 1\text{H}$ ), 4.32 – 4.29 (m, 1H), 4.24 (dd,  $J=7, 16.5, 1\text{H}$ ), 3.20 (dd,  $J=8, 14, 1\text{H}$ ), 3.11 (dd,  $J=6.5, 14, 1\text{H}$ ), 2.66 (d,  $J=2.5, 1\text{H}$ ), 2.47 (br, 1H);  $^{13}\text{C NMR}$  (126 MHz,  $\text{CDCl}_3$ )  $\delta = 147.8, 137.0, 135.7, 133.5, 133.4, 131.7, 131.6, 129.1, 128.5, 126.8, 124.1, 118.1, 81.7, 76.4, 63.4, 63.2, 47.5, 35.5$ ; HRMS (EI) calcd. for  $[\text{C}_{20}\text{H}_{20}\text{N}_2\text{O}_5\text{S}] (\text{M}+\text{H})^+$  401.1165, found 401.1164.

**(3*S*,4*R*)-4-(*N*-allyl-2-nitrophenylsulfonamido)-5-phenylpent-1-yn-3-yl acetate (6a)<sup>5</sup>**

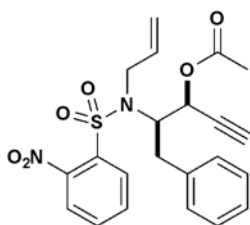

Yield 90% (white powder); IR (neat,  $\text{cm}^{-1}$ )  $\nu = 3282, 3090, 3029, 2918, 2124, 1745, 1534, 1371, 1353, 1226, 1164, 1031$ ;  $[\alpha]_{\text{D}}^{20} = + 55.4 \text{ cm}^3 \text{ g}^{-1} \text{ dm}^{-1}$  ( $c = 0.50 \text{ g cm}^3, \text{CHCl}_3$ );  $^1\text{H NMR}$  (500 MHz,  $\text{CDCl}_3$ )  $\delta = 7.84$  (d,  $J=8.0, 1\text{H}$ ), 7.65 – 7.62 (m, 1H), 7.59 – 7.53 (m, 2H), 7.28 – 7.18 (m, 5H), 5.78 – 5.71 (m, 1H), 5.45 (dd,  $J=2.5, 10.0, 1\text{H}$ ), 5.22 (d,  $J=17.0, 1\text{H}$ ), 5.06 (dd,  $J=10.0, 1\text{H}$ ), 4.59 (td,  $J=5.0, 8.0, 1\text{H}$ ), 4.43 (dd,  $J=5.5, 17.5, 1\text{H}$ ), 4.25 (dd,  $J=6.5, 17.0, 1\text{H}$ ), 3.15 (d,  $J=7.5, 2\text{H}$ ), 2.62 (d,  $J=2.5, 1\text{H}$ ), 1.97 (s, 3H);  $^{13}\text{C NMR}$  (126 MHz,  $\text{CDCl}_3$ )  $\delta = 169.1, 147.8, 136.3, 135.0, 134.1, 133.3, 131.7, 131.5, 129.1, 128.6, 127.0, 124.1, 117.6, 78.5, 76.8, 63.8, 60.4, 47.3, 36.1, 20.7$ ; HRMS (EI) calcd. for  $[\text{C}_{22}\text{H}_{22}\text{N}_2\text{O}_6\text{S}] (\text{M}+\text{H})^+$  443.1271, found 443.1263.

**(3*R*,4*R*)-4-(*N*-allyl-2-nitrophenylsulfonamido)-5-phenylpent-1-yn-3-yl acetate (6b)<sup>5</sup>**

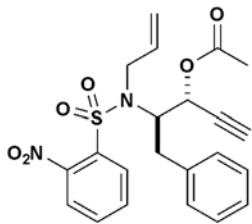

Yield 90% (white solid); IR (neat,  $\text{cm}^{-1}$ )  $\nu = 3287, 3089, 3029, 2917, 2126, 1747, 1544, 1372, 1353, 1225, 1164, 1023$ ;  $[\alpha]_{\text{D}}^{20} = +4.5 \text{ cm}^3 \text{ g}^{-1} \text{ dm}^{-1}$  ( $c = 0.24 \text{ g cm}^{-3}, \text{CHCl}_3$ );  $^1\text{H NMR}$  (500 MHz,  $\text{CDCl}_3$ )  $\delta = 7.58$  (t,  $J=7.5$ , 1H), 7.49 (d,  $J=8.0$ , 1H), 7.40 – 7.34 (m, 2H), 7.30 – 7.24 (m, 5H), 5.79 (ddd,  $J=6.0, 10.0, 16.5$ , 1H), 5.38 (dd,  $J=2.0, 7.0$ , 1H), 5.29 (d,  $J=17.5$ , 1H), 5.15 (d,  $J=10.0$ , 1H), 4.72 (dd,  $J=1.5, 6.5$ , 1H), 4.08 – 4.06 (m, 2H), 3.29 (dd,  $J=6.5, 14.0$ , 1H), 3.04 (dd,  $J=8.5, 14.0$ , 1H), 2.43 (d,  $J=2.5$ , 1H), 2.09 (s, 3H);  $^{13}\text{C NMR}$  (126 MHz,  $\text{CDCl}_3$ )  $\delta = 169.2, 148.4, 136.8, 134.7, 133.4, 133.2, 131.3, 130.9, 129.3, 128.7, 127.0, 123.6, 118.5, 78.7, 76.1, 63.7, 62.1, 47.5, 35.5, 20.7$ ; HRMS (EI) calcd. for  $[\text{C}_{22}\text{H}_{22}\text{N}_2\text{O}_6\text{S}]$  (M+H) $^+$  443.1271, found 443.1267.

**(2*R*,3*S*,*Z*)-2-benzyl-4-methylene-1-(2-nitrophenylsulfonyl)-2,3,4,7-tetrahydro-1*H*-azepin-3-ol (5a)**

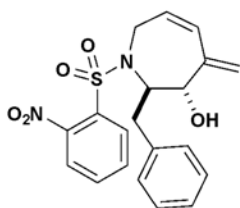

In a 15 mL flask, **1a** (0.0947 g, 0.236 mmol) was dissolved in dry toluene (0.05M) to give a colorless solution. Hoveyda-Grubbs 2<sup>nd</sup> generation catalyst (7.41 mg, 0.012 mmol) was added and the reaction mixture was stirred at room temperature under ethylene atmosphere (balloon) for 30 min. The solvent was removed under reduced pressure and the residue was purified by silica gel chromatography (Hex/EtAOc 1:1) to give **5a** in 50% yield as a pale yellow oil (0.048 mg, 0.120 mmol; *endo/exo* = 10: 1.5, inseparable on silica). Spectroscopic data for the major regioisomer: IR (neat,  $\text{cm}^{-1}$ )  $\nu = 3530, 3090, 3028, 2924, 2855, 1543, 1372, 1340, 1162, 1126$ ;  $^1\text{H NMR}$  (500 MHz,  $\text{CDCl}_3$ )  $\delta = 7.81$  (d,  $J=8.0$ , 1H), 7.70 (t,  $J=7.5$ , 1H), 7.52 – 7.49 (m, 2H), 7.19 – 7.14 (m, 5H), 6.06 (d,  $J=11.5$ , 1H), 5.68 – 5.64 (m, 1H), 5.35 (s, 1H), 5.04 (s, 1H), 4.42 (dd,  $J=6.0, 19.0$ , 1H), 4.34 – 4.30 (m, 1H), 4.27 – 4.24 (m, 1H), 3.72 – 3.68 (m, 1H), 3.04 – 3.01 (m, 2H), 2.33 (d,  $J=2.5$ , 1H);  $^{13}\text{C NMR}$  (126 MHz,  $\text{CDCl}_3$ )  $\delta = 145.5, 136.7, 133.3, 133.2, 131.3, 130.3, 129.6, 129.1, 128.4, 127.3, 126.8, 123.8, 118.8, 74.0, 63.1, 43.9, 37.1$ ; HRMS (EI) calcd. for  $[\text{C}_{20}\text{H}_{20}\text{N}_2\text{O}_5\text{S}]$  (M+Na) $^+$  423.0985, found 423.0981.

**General procedure for enyne metathesis reaction of 6a-b**

In a 50 mL flask, the appropriate enyne substrate **6a** or **6b** (1 equiv.) was dissolved in dry dichloromethane (0.05M) to give a colorless solution. Hoveyda-Grubbs 2<sup>nd</sup> generation catalyst (20 mol%) was added and the reaction mixture was stirred under ethylene atmosphere (balloon) at 45 °C for 7h (*syn*-diastereomer) and for 10h (*anti*-diastereomer). The solvent was removed under

reduced pressure. The residue was purified by silica gel chromatography (Hex/EtAOc 7:3). The two diastereoisomeric products **7a** and **7b** are inseparable on silica.

**(2*R*,3*S*)-2-benzyl-1-(2-nitrophenylsulfonyl)-4-vinyl-1,2,3,6-tetrahydropyridin-3-yl-acetate**

**(7a)**

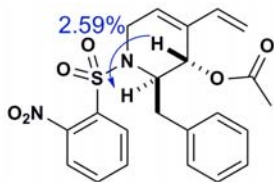

Yield 68% (white powder); IR (neat,  $\text{cm}^{-1}$ )  $\nu = 3091, 3028, 2956, 2853, 1735, 1543, 1371, 1234, 1165$ ;  $[\alpha]_D^{20} = -22.5 \text{ cm}^3 \text{ g}^{-1} \text{ dm}^{-1}$  ( $c = 0.20 \text{ g cm}^3, \text{CHCl}_3$ );  $^1\text{H NMR}$  (500 MHz,  $\text{CDCl}_3$ )  $\delta = 7.65$  (d,  $J=8.0$ , 1H), 7.58 – 7.56 (m, 2H), 7.47 – 7.43 (m, 1H), 7.12 – 7.07 (m, 5H), 6.35 (dd,  $J=10.5, 17.5$ , 1H), 6.09 – 6.08 (m, 1H), 5.42 (s, 1H), 5.11 (m, 2H), 4.60 (dd,  $J=4, 20.0$ , 1H), 4.52 (td,  $J=1.5, 8.0$ , 1H), 4.08 (d,  $J=20$ , 1H), 2.81 – 2.72 (m, 2H), 1.93 (s, 3H);  $^{13}\text{C NMR}$  (126 MHz,  $\text{CDCl}_3$ )  $\delta = 170.9, 147.5, 136.6, 135.5, 134.3, 132.9, 131.9, 131.0, 130.7, 129.1, 128.4, 128.1, 127.0, 124.1, 113.6, 65.1, 57.7, 41.7, 35.7, 20.9$ ; HRMS (EI) calcd. for  $[\text{C}_{22}\text{H}_{22}\text{N}_2\text{O}_6\text{S}]$  ( $\text{M}+\text{Na}$ ) $^+$  435.1090, found 465.1086. The relative configuration was confirmed by NOE experiment.

**(2*R*,3*R*)-2-benzyl-1-(2-nitrophenylsulfonyl)-4-vinyl-1,2,3,6-tetrahydropyridin-3-yl-acetate**

**(7b)**

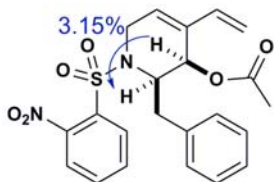

Yield 49% (pale yellow powder); IR (neat,  $\text{cm}^{-1}$ )  $\nu = 3092, 3028, 2978, 2936, 1740, 1542, 1370, 1231, 1163$ ;  $[\alpha]_D^{20} = -44.4 \text{ cm}^3 \text{ g}^{-1} \text{ dm}^{-1}$  ( $c = 0.18 \text{ g cm}^3, \text{CHCl}_3$ );  $^1\text{H NMR}$  (500 MHz,  $\text{CDCl}_3$ )  $\delta = 7.86$  (d,  $J=8.0$ , 1H), 7.58 – 7.50 (m, 3H), 7.04 – 7.06 (m, 5H), 6.20 (dd,  $J=11.0, 17.5$ , 1H), 6.02 – 6.01 (m, 1H), 5.76 – 5.75 (br, 1H), 5.23 (d,  $J=17.5$ , 1H), 5.09 (d,  $J=11.5$ , 1H), 4.66 (m, 1H), 4.48 – 4.44 (m, 1H), 4.06 – 4.03 (m, 1H), 2.89 (dd,  $J=5.0, 14.5$ , 1H), 2.73 (dd,  $J=5.0, 9.5$ , 1H), 1.92 (s, 3H);  $^{13}\text{C NMR}$  (126 MHz,  $\text{CDCl}_3$ )  $\delta = 170.1, 147.0, 137.4, 133.7, 133.3, 133.2, 132.0, 131.1, 128.9, 128.1, 128.1, 126.4, 124.6, 123.8, 115.2, 68.6, 54.7, 41.1, 32.4, 20.5$ ; HRMS (EI) calcd. for  $[\text{C}_{22}\text{H}_{22}\text{N}_2\text{O}_6\text{S}]$  ( $\text{M}+\text{Na}$ ) $^+$  465.1090, found 465.1083. The relative configuration was confirmed by NOE experiment.

**General procedure for the cycloisomerization reaction of enynes **1a-b****

In a 10 mL microwave vial, the appropriate diastereomer **1a** or **1b** (1 equiv.) was dissolved in 1,2-dichloroethane (0.05M) to give a pale yellow solution. Indium(III) chloride (15 mol%) was added and the reaction was irradiated at 90 °C for 20 minutes. The solvent was removed under reduced pressure and the residue was purified by silica gel chromatography (Hex/EtAOc 7:3).

**(2*R*,3*S*)-2-benzyl-1-(2-nitrophenylsulfonyl)-4-vinyl-1,2,3,6-tetrahydropyridin-3-ol (8a)**

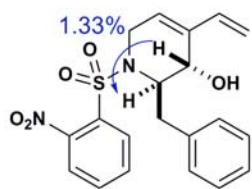

Yield 70% (colorless oil); IR (neat,  $\text{cm}^{-1}$ )  $\nu = 3537, 3091, 3027, 2922, 2851, 1542, 1371, 1162, 1022$ ;  $[\alpha]_{\text{D}}^{20} = + 53.7 \text{ cm}^3 \text{ g}^{-1} \text{ dm}^{-1}$  ( $c = 0.09 \text{ g cm}^3, \text{CHCl}_3$ );  $^1\text{H NMR}$  (500 MHz, Benzene)  $\delta = 7.76$  (d,  $J=8.0, 1\text{H}$ ),  $6.98 - 6.94$  (m, 4H),  $6.93 - 6.90$  (m, 1H),  $6.64 - 6.61$  (m, 1H),  $6.57 - 6.53$  (m, 1H),  $6.47 - 6.43$  (m, 1H),  $6.06$  (dd,  $J=11.0, 17.5, 1\text{H}$ ),  $5.25$  (d,  $J=17.5, 1\text{H}$ ),  $5.16 - 5.15$  (m, 1H),  $4.92$  (d,  $J=12.5, 1\text{H}$ ),  $4.31$  (dd,  $J=5.0, 20.0, 1\text{H}$ ),  $4.26 - 4.24$  (m, 1H),  $4.16$  (d,  $J=8.0, 1\text{H}$ ),  $3.59$  (d,  $J=20.0, 1\text{H}$ ),  $2.81$  (dd,  $J=5.5, 13.0, 1\text{H}$ ),  $2.33$  (dd,  $J=10.0, 13.0, 1\text{H}$ ),  $1.99$  (br, 1H);  $^{13}\text{C NMR}$  (126 MHz,  $\text{CDCl}_3$ )  $\delta = 147.5, 137.0, 135.8, 134.8, 133.6, 133.1, 131.9, 131.4, 129.1, 128.6, 126.8, 125.3, 124.3, 114.0, 63.4, 60.9, 41.6, 36.1$ ; HRMS (EI) calcd. for  $[\text{C}_{20}\text{H}_{20}\text{N}_2\text{O}_5\text{S}] (\text{M}+\text{H})^+$  401.1165, found 401.1158. The relative configuration was determined by NOE experiment.

**(2*R*,3*R*)-2-benzyl-1-(2-nitrophenylsulfonyl)-4-vinyl-1,2,3,6-tetrahydropyridin-3-ol (8b)**

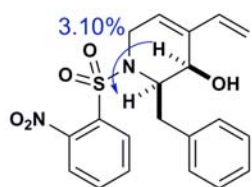

Yield 69% (white powder); IR (neat,  $\text{cm}^{-1}$ )  $\nu = 3535, 3090, 3027, 2892, 1541, 1367, 1338, 1160, 1090$ ;  $[\alpha]_{\text{D}}^{20} = - 109.0 \text{ cm}^3 \text{ g}^{-1} \text{ dm}^{-1}$  ( $c = 0.11 \text{ g cm}^3, \text{CHCl}_3$ );  $^1\text{H NMR}$  (500 MHz,  $\text{CDCl}_3$ )  $\delta = 7.67$  (dd,  $J=8.0, 1\text{H}$ ),  $7.53 - 7.52$  (m, 2H),  $7.44 - 7.41$  (m, 1H),  $7.06 - 7.05$  (m, 2H),  $6.97 - 6.92$  (m, 3H),  $6.34$  (dd,  $J=11.5, 17.5, 1\text{H}$ ),  $5.89$  (m, 1H),  $5.50$  (d,  $J=18.0, 1\text{H}$ ),  $5.20$  (d,  $J=12.5, 1\text{H}$ ),  $4.81$  (m, 1H),  $4.40 - 4.36$  (m, 1H),  $4.32$  (m, 1H),  $4.14 - 4.10$  (m, 1H),  $3.18$  (dd,  $J=5.0, 14.0, 1\text{H}$ ),  $2.61$  (dd,  $J=10.0, 14.0, 1\text{H}$ ),  $2.10$  (br, 1H);  $^{13}\text{C NMR}$  (126 MHz,  $\text{CDCl}_3$ )  $\delta = 146.9, 137.9, 136.4, 134.6, 133.8, 132.9, 131.9, 130.7, 129.0, 128.0, 126.3, 124.4, 123.4, 115.8, 66.6, 59.3, 42.2, 30.8$ ; HRMS (EI) calcd. for  $[\text{C}_{20}\text{H}_{20}\text{N}_2\text{O}_5\text{S}] (\text{M}+\text{H})^+$  401.1165, found 401.1172. The relative configuration was determined by NOE experiment.

**General procedure for the Pauson-Khand reaction**

In a flame-dried flask, the appropriate diastereomer **6a** or **6b** (1 equiv.) was dissolved in dry THF (0.05M) to give a colorless solution. Cobalt octacarbonyl (1.05 equiv) was added and the resulting orange reaction mixture was stirred for 1h under nitrogen. The solution was then cooled to 0 °C and 4-methylmorpholine 4-oxide (2 equiv) was added. The reaction was stirred for 3h at room temperature and then 2 more equiv of 4-methylmorpholine 4-oxide were added and the reaction mixture was stirred for further 3h under nitrogen. The mixture was passed through a short silica plug and eluted with EtOAc (15 mL) and DCM/EtOH 4:1 (15 mL). The filtrate was

concentrated under reduced pressure and the residue purified by flash chromatography (Hex/EtOAc 1:1).

**(3*R*,4*S*,7*aS*)-3-benzyl-2-(2-nitrophenylsulfonyl)-6-oxo-2,3,4,6,7,7*a*-hexahydro-1*H*-cyclopenta [c]pyridin-4-yl acetate (9a)**

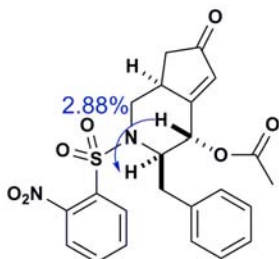

Yield 70% (white powder); IR (neat,  $\text{cm}^{-1}$ )  $\nu = 3093, 3028, 2919, 2850, 1741, 1716, 1636, 1543, 1371, 1233, 1164, 1127, 1062$ ;  $[\alpha]_{\text{D}}^{20} = -125.0 \text{ cm}^3 \text{ g}^{-1} \text{ dm}^{-1}$  ( $c = 0.12 \text{ g cm}^3, \text{CHCl}_3$ );  $^1\text{H NMR}$  (500 MHz,  $\text{CDCl}_3$ )  $\delta = 7.67$  (d,  $J=8.0$ , 1H), 7.63 – 7.62 (m, 2H), 7.53 – 7.49 (m, 1H), 7.20 – 7.12 (m, 5H), 6.25 (d,  $J=1.5$ , 1H), 5.46 (d,  $J=2.0$ , 1H), 4.71 (t,  $J=8.0$ , 1H), 4.32 (dd,  $J=6.5, 13.5$ , 1H), 3.50 – 3.45 (m, 1H), 3.02 – 2.97 (m, 1H), 2.82 (dd,  $J=7.5, 13.5$ , 1H), 2.73 (dd,  $J=8.5, 13.5$ , 1H), 2.65 (dd,  $J=7.0, 19.0$ , 1H), 2.10 (dd,  $J=2.5, 19.0$ , 1H), 1.96 (s, 3H);  $^{13}\text{C NMR}$  (126 MHz,  $\text{CDCl}_3$ )  $\delta = 206.2, 170.6, 169.9, 147.5, 135.6, 133.8, 133.3, 132.5, 132.0, 130.9, 129.0, 128.8, 127.3, 124.3, 68.2, 59.1, 47.6, 38.3, 37.2, 34.6, 20.8$ ; HRMS (EI) calcd. for  $[\text{C}_{23}\text{H}_{22}\text{N}_2\text{O}_7\text{S}]$  (M+H) $^+$  471.1220, found 471.1228. The relative configuration was determined by NOE experiment.

**(3*R*,4*R*,7*aS*)-3-benzyl-2-(2-nitrophenylsulfonyl)-6-oxo-2,3,4,6,7,7*a*-hexahydro-1*H*-cyclopenta [c]pyridin-4-yl acetate (9b)**

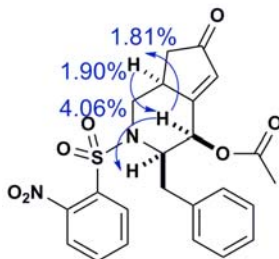

Yield 55% (white powder); IR (neat,  $\text{cm}^{-1}$ )  $\nu = 3093, 3028, 2917, 2849, 1747, 1711, 1632, 1541, 1367, 1227, 1161, 1058$ ;  $[\alpha]_{\text{D}}^{20} = -142.3 \text{ cm}^3 \text{ g}^{-1} \text{ dm}^{-1}$  ( $c = 0.25 \text{ g cm}^3, \text{CHCl}_3$ );  $^1\text{H NMR}$  (500 MHz,  $\text{CDCl}_3$ )  $\delta = 7.77$  (d,  $J=8.0$ , 1H), 7.61 – 7.56 (m, 2H), 7.51 – 7.47 (m, 1H), 6.97 – 6.93 (m, 5H), 6.19 (s, 1H), 5.85 (d,  $J=6.0$ , 1H), 4.74 – 4.69 (m, 1H), 4.43 (dd,  $J=6.0, 13.5$ , 1H), 3.27 – 3.22 (m, 1H), 3.07 (dd,  $J=11.5, 14.0$ , 1H), 2.90 (dd,  $J=5.0, 15.0$ , 1H), 2.68 – 2.58 (m, 2H), 2.21 (dd,  $J=2.5, 19.0$ , 1H), 2.04 (s, 3H);  $^{13}\text{C NMR}$  (126 MHz,  $\text{CDCl}_3$ )  $\delta = 205.0, 173.8, 169.2, 147.0, 136.3, 133.5, 133.0, 132.1, 131.1, 128.8, 128.7, 128.2, 126.6, 124.8, 72.0, 58.6, 46.5, 41.4, 38.3, 31.8, 20.4$ ; HRMS (EI) calcd. for  $[\text{C}_{23}\text{H}_{22}\text{N}_2\text{O}_7\text{S}]$  (M+H) $^+$  471.1220, found 471.1227. The relative configuration was determined by NOE experiment.

**(2*R*,3*S*)-*N*-allyl-3-(2-nitrophenoxy)-1-phenylpent-4-yn-2-amine (10a)**

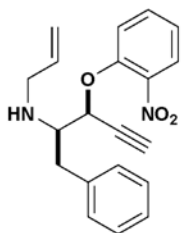

In 10 mL-flask, **1a** (0.0083 g, 0.021 mmol) was dissolved in THF (0.207 mL, 0.1M). The resulting solution was cooled to 0 °C and TBAF (0.065 mL, 0.065

mmol) was added. The reaction mixture was stirred under nitrogen for 30 min, then it was quenched with saturated aqueous  $\text{NH}_4\text{Cl}$ , the solvent removed under reduced pressure and the residue was loaded on TLC plate. The plate was developed using Hex/EtOAc 7:3. Yield 50% (yellow oil); IR (neat,  $\text{cm}^{-1}$ )  $\nu = 3287, 3062, 3027, 2923, 2858, 2116, 1605, 1524, 1484, 1349, 1277, 1248$ ;  $[\alpha]_{\text{D}}^{20} = -4.5 \text{ cm}^3 \text{ g}^{-1} \text{ dm}^{-1}$  ( $c = 0.2 \text{ g cm}^3, \text{CHCl}_3$ );  $^1\text{H NMR}$  (600 Hz,  $\text{CDCl}_3$ )  $\delta = 7.87$  (d,  $J=7.0$ , 1H), 7.51 (t,  $J=7.0$ , 1H), 7.32 – 7.21 (m, 6H), 7.07 (t,  $J=7.0$ , 1H), 5.80 (ddd,  $J=5.0, 9.5, 14.0$ , 1H), 5.14 (d,  $J=15.0$ , 1H), 5.07 (d,  $J=8.5$ , 1H), 4.83 (m, 1H), 3.38 – 3.36 (m, 2H), 3.36 – 3.34 (m, 1H), 3.06 (dd,  $J=5.0, 12.0$ , 1H), 3.00 (dd,  $J=5.0, 12.0$ , 1H), 2.67 (d,  $J=2.5$ , 1H), 1.67 (br, 1H);  $^{13}\text{C NMR}$  (126 MHz,  $\text{CDCl}_3$ )  $\delta = 150.7, 140.2, 138.3, 137.6, 133.9, 129.4, 129.3, 128.5, 126.5, 125.7, 121.3, 116.2, 78.6, 78.0, 71.6, 61.6, 50.3, 37.2$ ; HRMS (EI) calcd. for  $[\text{C}_{20}\text{H}_{20}\text{N}_2\text{O}_3\text{S}]$  (M+H) $^+$  337.1546, found 337.1546.

**(2*R*,3*R*)-*N*-allyl-3-(2-nitrophenoxy)-1-phenylpent-4-yn-2-amine (10b)**

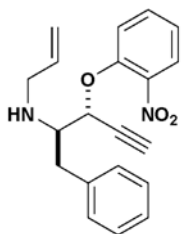

In 50 mL-flask, **1b** (0.123 g, 0.307 mmol) was dissolved in THF (6.14 mL, 0.1M) and DBU (0.139 mL, 0.921 mmol) was added. The reaction mixture was heated to 64 °C and stirred under nitrogen for 4h. Then the reaction was quenched with water, EtOAc was added and the two phases were separated. The aqueous layer was extracted with EtOAc and the combined organic phases were washed with brine, dried over  $\text{Na}_2\text{SO}_4$ , filtered and concentrated under reduced pressure. The residue was purified by flash chromatography (Hex/EtOAc 7:3). Yield 70% (yellow oil); IR (neat,  $\text{cm}^{-1}$ )  $\nu = 3287, 3062, 3027, 2918, 2116, 1605, 1525, 1483, 1350, 1277, 1248$ ;  $[\alpha]_{\text{D}}^{20} = +10.8 \text{ cm}^3 \text{ g}^{-1} \text{ dm}^{-1}$  ( $c = 0.16 \text{ g cm}^3, \text{CHCl}_3$ );  $^1\text{H NMR}$  (500 MHz,  $\text{CDCl}_3$ )  $\delta = 7.91$  (d,  $J=8.0$ , 1H), 7.53 (t,  $J=7.0$ , 1H), 7.30 – 7.21 (m, 6H), 7.09 (t,  $J=8.0$ , 1H), 5.78 (ddd,  $J=5.0, 9.5, 14.0$ , 1H), 5.13 (d,  $J=17.0$ , 1H), 5.05 (d,  $J=10.0$ , 1H), 4.82 (m, 1H), 3.35 – 3.34 (m, 2H), 3.32 – 3.28 (m, 1H), 3.19 (dd,  $J=6.0, 14.0$ , 1H), 2.89 (dd,  $J=7.5, 14.0$ , 1H), 2.61 (d,  $J=2.0$ , 1H), 1.63 (br, 1H);  $^{13}\text{C NMR}$  (126 MHz,  $\text{CDCl}_3$ )  $\delta = 150.7, 140.1, 138.4, 136.7, 134.0, 129.4, 128.5, 126.4, 125.8, 121.2, 116.2, 116.1, 79.2, 70.9, 61.5, 50.4, 36.8$ ; HRMS (EI) calcd. for  $[\text{C}_{20}\text{H}_{20}\text{N}_2\text{O}_3\text{S}]$  (M+H) $^+$  337.1546, found 337.1556.

**(3*R*,4*S*)-3-benzyl-4-ethynyl-2-prop-2-en-1-yl-3,4-dihydro-2*H*-5,1,2-benzoxathiazepine 1,1-dioxide (11a)**

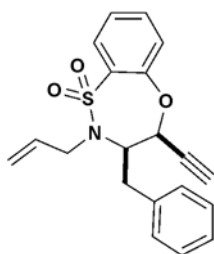

In a 100 mL flame-dried flask, propargylic alcohol **1a** (0.450 g, 1.124 mmol) was dissolved in dry THF (11.24 mL). The resulting colorless solution was

cooled  $-10\text{ }^{\circ}\text{C}$  and sodium hydride (0.081 g, 3.37 mmol) was added. The reaction was stirred under nitrogen for 5h, maintaining the temperature between  $-10\text{ }^{\circ}\text{C}$  and  $0\text{ }^{\circ}\text{C}$ . Then, the reaction mixture was quenched with saturated aqueous  $\text{NH}_4\text{Cl}$  at  $0\text{ }^{\circ}\text{C}$ . Diethyl ether and water were added and the two phases were separated. The aqueous layer was extracted with diethyl ether and the combined organic phases were dried over  $\text{Na}_2\text{SO}_4$ , filtered and evaporated under reduced pressure. The resulting residue was purified by silica gel chromatography (Hex/EtOAc 7:3). Yield 75% (white solid). The purified compound was crystallized from  $\text{CHCl}_3/\text{Hexanes}$ . IR (neat,  $\text{cm}^{-1}$ )  $\nu = 3275, 3065, 3028, 2929, 2119, 1589, 1467, 1447, 1345, 1171, 1073, 1007$ ;  $[\alpha]_{\text{D}}^{20} = -27.1\text{ cm}^3\text{ g}^{-1}\text{ dm}^{-1}$  ( $c = 0.63\text{ g cm}^3, \text{CHCl}_3$ );  $^1\text{H NMR}$  (500 MHz, DMSO,  $T = 65\text{ }^{\circ}\text{C}$ )  $\delta = 7.75$  (d,  $J=8.0$ , 1H), 7.66 (t,  $J=8.0$ , 1H), 7.39 (t,  $J=8.0$ , 1H), 7.36 – 7.35 (m, 4H), 7.29 – 7.26 (m, 2H), 5.46 (ddd,  $J=6.0, 11.0, 16.5$ , 1H), 5.07 – 5.03 (m, 2H), 4.95 (d,  $J=10.5$ , 1H), 4.46 (br, 1H), 3.99 (dd,  $J=5.0, 16.5$ , 1H), 3.82 (d,  $J=2.5$ , 1H), 3.48 (dd,  $J=5.0, 17.0$ , 1H), 3.36 – 3.31 (m, 1H), 3.16 (dd,  $J=6.0, 14.5$ , 1H);  $^{13}\text{C NMR}$  (126 MHz,  $\text{CDCl}_3$ ,  $T = 55\text{ }^{\circ}\text{C}$ )  $\delta = 152.6, 136.7, 135.7, 135.5, 133.8, 129.3, 128.8, 128.7, 127.1, 125.7, 124.8, 116.9, 80.7, 77.1, 70.5, 63.2, 48.9, 35.8$ ; HRMS (EI) calcd. for  $[\text{C}_{20}\text{H}_{19}\text{NO}_3\text{S}]$  (M+H) $^+$  354.1158, found 354.1161.

**(3R,4R)-3-benzyl-4-ethynyl-2-prop-2-en-1-yl-3,4-dihydro-2H-5,1,2-benzoxathiazepine 1,1-dioxide (11b)**

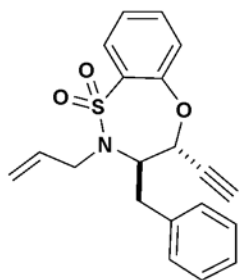

In a 50 mL flame-dried flask, propargylic alcohol **1b** (0.106 g, 0.264 mmol) was dissolved in dry THF (5.28 mL). The resulting colorless solution was cooled  $0\text{ }^{\circ}\text{C}$  and sodium hydride (0.019 g, 0.792 mmol) was added. The reaction was stirred under nitrogen for 5h, allowing the temperature to rise to room temperature. Then, the reaction mixture was quenched with saturated aqueous  $\text{NH}_4\text{Cl}$  at  $0\text{ }^{\circ}\text{C}$ . Diethyl ether and water were added and the two phases were separated. The aqueous layer was extracted with diethyl ether and the combined organic phases were dried over  $\text{Na}_2\text{SO}_4$ , filtered and evaporated under reduced pressure. The resulting residue was purified by silica gel chromatography (Hex/EtOAc 4:1). Yield 35% (white solid); IR (neat,  $\text{cm}^{-1}$ )  $\nu = 3278, 3066, 3028, 2923, 2850, 2127, 1593, 1470, 1443, 1340, 1155, 1075$ ;  $[\alpha]_{\text{D}}^{20} = -8.8\text{ cm}^3\text{ g}^{-1}\text{ dm}^{-1}$  ( $c = 0.11\text{ g cm}^3, \text{CHCl}_3$ );  $^1\text{H NMR}$  (500 MHz,  $\text{CDCl}_3$ ,  $T = 55\text{ }^{\circ}\text{C}$ )  $\delta = 7.82$  (d,  $J=7.5$ , 1H), 7.44 (t,  $J=8.0$ , 1H), 7.34 – 7.32 (m, 4H), 7.28 – 7.25 (m, 1H), 7.20 (t,  $J=7.5$ , 1H), 7.15 (d,  $J=7.5$ , 1H), 5.59 (d,  $J=10$ , 1H), 5.02 – 4.96 (m, 1H), 4.90 (d,  $J=17.0$ , 1H), 4.83 (d,  $J=10.0$ , 1H), 3.76 (t,  $J=10.0$ , 1H), 3.53 (m, 2H), 3.32 – 3.27 (m, 1H), 3.17 (dd,  $J=3.5, 14.0$ , 1H), 2.77 (d,  $J=2.0$ , 1H);  $^{13}\text{C NMR}$  (126 MHz,  $\text{CDCl}_3$ ,  $T = 55\text{ }^{\circ}\text{C}$ )  $\delta =$



154.0, 137.7, 133.4, 132.3, 130.2, 128.4, 128.3, 126.6, 124.1, 121.9, 119.1, 79.2, 77.1, 75.7, 67.5, 55.3, 37.2; HRMS (EI) calcd. for  $[C_{20}H_{19}NO_3S] (M+Na)^+$  376.0977, found 376.0974.

**(3*R*,4*S*)-3-benzyl-4-(1-methylideneprop-2-en-1-yl)-2-prop-2-en-1-yl-3,4-dihydro-2*H*-5,1,2-benzoxathiazepine (12a)**

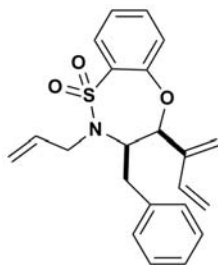

In 25 mL flame-dried pear flask, **11a** (0.100 g, 0.283 mmol) was dissolved in dry benzene (5.66 mL) to give a colorless solution. Hoveyda-Grubbs 2<sup>nd</sup> generation catalyst (8.86 mg, 0.014 mmol) was added and the resulting green solution was stirred under ethylene atmosphere (balloon) for 45 min at room temperature. The reaction mixture was concentrated to about 2 mL,  $Pb(OAc)_4$  (8.7 mg, 5 equiv to the amount of Grubbs catalyst) was added and the resulting mixture was stirred under nitrogen for 18h at room temperature. The solvent was evaporated under reduced pressure and the residue was purified by silica gel chromatography (Hex/EtOAc 9:1). Yield 56% (white powder); IR (neat,  $cm^{-1}$ )  $\nu = 3086, 3064, 3027, 2926, 2855, 1589, 1468, 1447, 1350, 1263, 1229, 1169, 1072, 1012$ ;  $[\alpha]_D^{20} = +91.3 \text{ cm}^3 \text{ g}^{-1} \text{ dm}^{-1}$  ( $c = 0.15 \text{ g cm}^3$ ,  $CHCl_3$ );  $^1H$  NMR (500 MHz, Benzene)  $\delta = 7.85$  (d,  $J=8.0$ , 1H), 7.47 – 7.46 (m, 2H), 7.14 – 7.10 (m, 2H), 7.03 (t,  $J=7.0$ , 1H), 6.85 – 6.79 (m, 2H), 6.66 (t,  $J=7.0$ , 1H), 6.07 (dd,  $J=11.0, 18.0$ , 1H), 5.74 (s, 1H), 5.22 (s, 1H), 4.99 (ddd,  $J=4.0, 11.0, 17.5$ , 1H), 4.80 – 4.77 (m, 2H), 4.57 (d,  $J=10.0$ , 1H), 4.50 (d,  $J=17.0$ , 1H), 4.46 (m, 1H), 4.15 – 4.10 (m, 1H), 3.87 (dd,  $J=5.0, 15.0$ , 1H), 3.61 – 3.57 (m, 1H), 2.89 (dd,  $J=3.0, 14.0$ , 1H), 2.77 (dd,  $J=8.0, 15.0$ , 1H);  $^{13}C$  NMR (126 MHz,  $CDCl_3$ )  $\delta = 156.5, 142.5, 138.7, 136.1, 135.8, 134.2, 133.2, 130.0, 128.2, 128.0, 126.0, 124.7, 123.3, 118.7, 118.1, 114.4, 81.0, 64.5, 53.7, 32.6$ ; HRMS (EI) calcd. for  $[C_{22}H_{23}NO_3S] (M+H)^+$  382.1471, found 382.1475.

**(3*R*,4*R*)-3-benzyl-4-(1-methylideneprop-2-en-1-yl)-2-prop-2-en-1-yl-3,4-dihydro-2*H*-5,1,2-benzoxathiazepine (12b)**

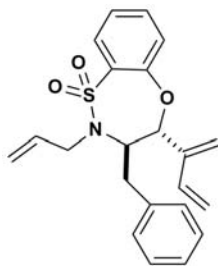

**12b** was obtained from **11b** (0.0115 g, 0.033 mmol) according to the procedure described for the diastereomer **12a**. 10 mol% of Hoveyda-Grubbs 2<sup>nd</sup> generation catalyst were used in this case and the reaction mixture was stirred for 6h. The residue was loaded on TLC plate. The plate was developed using Hex/EtOAc 9:1. Yield 39% (white powder); IR (neat,  $cm^{-1}$ )  $\nu = 3086, 3065, 3028, 2933, 2866, 1594, 1470, 1443, 1339, 1265, 1227, 1154, 1075$ ;  $[\alpha]_D^{20} = +23.3 \text{ cm}^3 \text{ g}^{-1} \text{ dm}^{-1}$  ( $c = 0.24 \text{ g cm}^3$ ,  $CHCl_3$ );  $^1H$  NMR (500 MHz, Benzene)

$\delta = 7.90$  (d,  $J=8.0$ , 1H), 7.29 – 7.28 (m, 2H), 7.09 – 7.06 (m, 2H), 7.02 – 6.89 (m, 1H), 6.79 – 6.73 (m, 2H), 6.57 (t,  $J=8.0$ , 1H), 6.26 (dd,  $J=12.5$ , 18.0, 1H), 5.76 – 5.74 (m, 1H), 5.45 (d,  $J=18.0$ , 1H), 5.01 (s, 1H), 4.97 – 4.95 (m, 1H), 4.95 (buried s, 1H), 4.90 – 4.87 (m, 1H), 4.58 – 4.53 (m, 2H), 3.82 (m, 1H), 3.55 – 3.45 (m, 2H), 3.43 – 3.38 (m, 1H), 2.57 (dd,  $J=3.0$ , 13.0, 1H);  $^{13}\text{C}$  NMR (126 MHz,  $\text{CDCl}_3$ )  $\delta = 155.04$ , 143.50, 138.03, 134.75, 133.25, 132.55, 130.15, 128.35, 128.26, 126.42, 123.42, 121.58, 119.07, 119.00, 116.86, 86.74, 65.77, 55.49, 36.93; HRMS (EI) calcd. for  $[\text{C}_{22}\text{H}_{23}\text{NO}_3\text{S}]$  (M+H) $^+$  382.1471, found 382.1474.

**(10R,14S)-14-benzyl-11-ethenyl-9-oxa-2-thia-1-azatricyclo[8.3.1.0<sup>3,8</sup>]tetradeca-3,5,7,11-tetraene 2,2-dioxide (13a)**

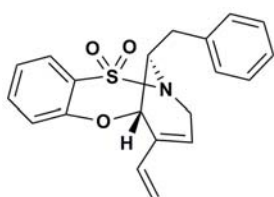

In 25 mL flame-dried pear flask, **11a** (0.055 g, 0.156 mmol) was dissolved dry DCM (7.78 mL) to give a colorless solution. Grubbs catalyst 1<sup>st</sup> generation (3.84 mg, 4.67  $\mu\text{mol}$ ) was added and the resulting pink solution was stirred under nitrogen for 2h at room temperature. The reaction mixture was concentrated to about 2 mL,  $\text{Pb}(\text{OAc})_4$  (9 mg, 5 equiv to the amount of Grubbs catalyst) was added and the resulting mixture was stirred under nitrogen for 18h at room temperature. The solvent was evaporated under reduced pressure and the residue was purified by silica gel chromatography (Hex/EtOAc 1:1). The purified compound was crystallized from  $\text{CHCl}_3$ /Hexanes. Yield 95 % (white solid); IR (neat,  $\text{cm}^{-1}$ )  $\nu = 3063$ , 3027, 2924, 2852, 1589, 1466, 1444, 1344, 1167, 1072;  $[\alpha]_{\text{D}}^{20} = -77.7 \text{ cm}^3 \text{ g}^{-1} \text{ dm}^{-1}$  ( $c = 0.09 \text{ g cm}^3$ ,  $\text{CHCl}_3$ );  $^1\text{H}$  NMR (500 MHz,  $\text{CDCl}_3$ )  $\delta = 7.80$  (d,  $J=8.0$ , 1H), 7.38 – 7.33 (m, 3H), 7.29 – 7.24 (m, 3H), 7.16 (t,  $J=7.0$ , 1H), 6.92 (d,  $J=8.0$ , 1H), 6.08 (dd,  $J=11.0$ , 17.5, 1H), 5.70 – 5.69 (m, 1H), 5.54 (d,  $J=17.5$ , 1H), 5.19 (d,  $J=11.0$ , 1H), 4.97 – 4.93 (m, 2H), 4.15 (dd,  $J=4.0$ , 21.0, 1H), 3.93 (d,  $J=21.0$ , 1H), 2.99 (dd,  $J=7.0$ , 14.0, 1H), 2.78 (dd,  $J=9.5$ , 14.0, 1H);  $^{13}\text{C}$  NMR (126 MHz,  $\text{CDCl}_3$ )  $\delta = 151.3$ , 136.4, 134.1, 133.7, 130.2, 129.01, 128.9, 128.8, 128.2, 127.0, 125.0, 124.0, 114.6, 70.2, 58.4, 41.8, 35.8; HRMS (EI) calcd. for  $[\text{C}_{20}\text{H}_{19}\text{NO}_3\text{S}]$  (M+H) $^+$  354.1158, found 354.1162.

**(10R,14R)-14-benzyl-11-ethenyl-9-oxa-2-thia-1-azatricyclo[8.3.1.0<sup>3,8</sup>]tetradeca-3,5,7,11-tetraene 2,2-dioxide (13b)**

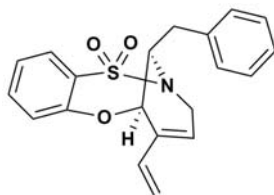

**13b** was obtained from **11b** (0.0115 g, 0.033 mmol) according to the enyne metathesis procedure described for the compound **12b**. Yield 19% (white solid); IR (neat,  $\text{cm}^{-1}$ )  $\nu = 3063$ , 3027, 2930, 1589, 1468, 1443, 1350, 1333, 1167, 1068;  $[\alpha]_{\text{D}}^{20} = +81.6 \text{ cm}^3 \text{ g}^{-1} \text{ dm}^{-1}$  ( $c = 0.12 \text{ g}$

cm<sup>3</sup>, CHCl<sub>3</sub>); <sup>1</sup>H NMR (600 MHz, CDCl<sub>3</sub>) δ = 7.82 (d, *J*=8.0, 1H), 7.42 – 7.41 (m, 2H), 7.38 – 7.36 (m, 2H), 7.29 – 7.27 (m, 2H), 7.17 (t, *J*=7.5, 1H), 7.03 (d, *J*=8.0, 1H), 5.90 (dd, *J*=11.0, 17.5, 1H), 5.62 (m, 1H), 5.51 (d, *J*=17.5, 1H), 5.10 (d, *J*=11.0, 1H), 4.94 (s, 1H), 4.40 (dd, *J*=3.5, 17.0, 1H), 4.00 (d, *J*=17.0, 1H), 3.72 (dd, *J*=7.5, 11.5, 1H), 3.58 (dd, *J*=5.0, 10.0, 1H), 3.52 (dd, *J*=4.0, 11.5, 1H); <sup>13</sup>C NMR (126 MHz, CDCl<sub>3</sub>) δ = 150.7, 139.0, 135.8, 135.0, 133.4, 133.0, 129.7, 129.2, 128.7, 128.0, 126.7, 125.3, 123.9, 114.7, 68.7, 63.6, 50.0, 37.1; HRMS (EI) calcd. for [C<sub>20</sub>H<sub>19</sub>NO<sub>3</sub>S] (M+H)<sup>+</sup> 354.1158, found 354.1158.

### Compound (14a)

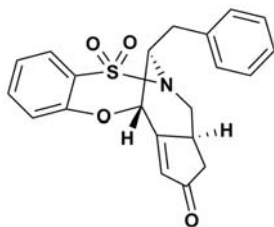

**14a** was obtained from **11a** (0.158 g, 0.447 mmol) according to the reported general procedure for the Pauson-Khand reaction. In the work-up phase, the filtrate was washed with 5% CuSO<sub>4</sub> aqueous solution.

The aqueous phase was extracted with EtOAc. The combined organic layers were washed once with brine, dried over Na<sub>2</sub>SO<sub>4</sub> and evaporated

under reduced pressure. The residue was purified by silica gel chromatography (Hex/EtOAc 1:1). The purified compound was crystallized from CHCl<sub>3</sub>/Hexanes. Yield 26% (pale yellow solid); IR (neat, cm<sup>-1</sup>) ν = 3064, 3029, 2924, 2854, 1716, 1621, 1589, 1466, 1341, 1261, 1207, 1166, 1000; [α]<sub>D</sub><sup>20</sup> = -130.0 cm<sup>3</sup> g<sup>-1</sup> dm<sup>-1</sup> (c = 0.04 g cm<sup>3</sup>, CHCl<sub>3</sub>); <sup>1</sup>H NMR (500 MHz, Benzene) δ = 7.89 (d, *J*=8.0, 1H), 7.09 – 7.03 (m, 3H), 6.88 – 6.87 (m, 2H), 6.77 (t, *J*=8.0, 1H), 6.69 (d, *J*=8.0, 1H), 6.59 (t, *J*=8.0, 1H), 5.69 (d, *J*=2.0, 1H), 5.21 (t, *J*=8.5, 1H), 4.62 (d, *J*=2.0, 1H), 3.78 (dd, *J*=8.0, 15.0, 1H), 2.38 (dd, *J*=7.5, 14.0, 1H), 2.30 (dd, *J*=11.5, 15.0, 1H), 2.07 (dd, *J*=10.0, 15.0, 1H), 2.03 – 2.01 (m, 1H), 1.39 (dd, *J*=6.5, 18.5, 1H), 1.01 (dd, *J*=3.0, 18.5, 1H); <sup>13</sup>C NMR (126 MHz, CDCl<sub>3</sub>) δ = 205.1, 169.5, 152.5, 136.7, 135.5, 134.9, 129.2, 129.1, 128.8, 127.4, 124.9, 124.8, 73.9, 60.8, 46.5, 40.1, 35.2, 35.1; HRMS (EI) calcd. for [C<sub>21</sub>H<sub>19</sub>NO<sub>4</sub>S] (M+H)<sup>+</sup> 382.1107, found 382.1110.

### References

- (1) Weininger, D. A. *J. Chem. Inf. Comput. Sci.* **1988**, *28*, 31-36.
- (2) Sauer, W. H.; Schwarz, M. K. *J. Chem. Inf. Comput. Sci.* **2003**, *43*, 987-1003.
- (3) Fukuyama, T.; Jow, C-K.; Cheung, M. *Tetrahedron Lett.* **1995**, *36*, 6373-6374.
- (4) Miller, S. C.; Scanlan, T. S. *J. Am. Chem. Soc.* **1998**, *120*, 2690-2691.
- (5) For the acetylation of the amino propargylic alcohols **1a** and **1b** see: Hofle, G.; Steglich, W.; Vorbruggen, H. *Angew. Chemie* **1978**, *90*, 602-615; *Angew. Chemie Int. Ed.* **1978**, *17*, 569-583;

### III. <sup>1</sup>H and <sup>13</sup>C NMR spectra

Spectral data for (R)-2-(2-nitrophenylsulfonamido)-3-phenylpropanoic acid (R)-i

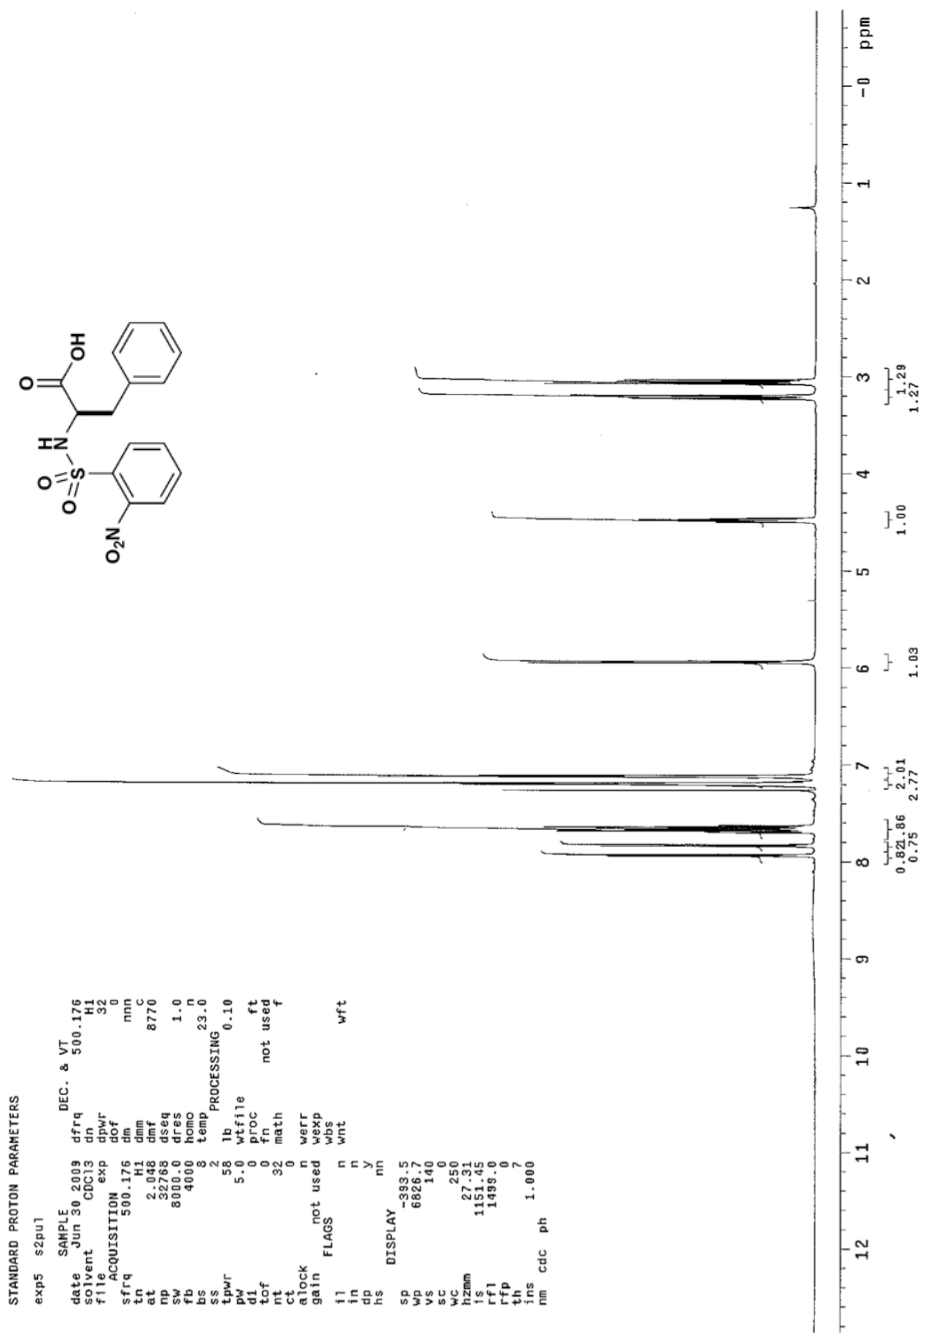

<sup>1</sup>H NMR (500 MHz, CDCl<sub>3</sub>) of compound (R)-i

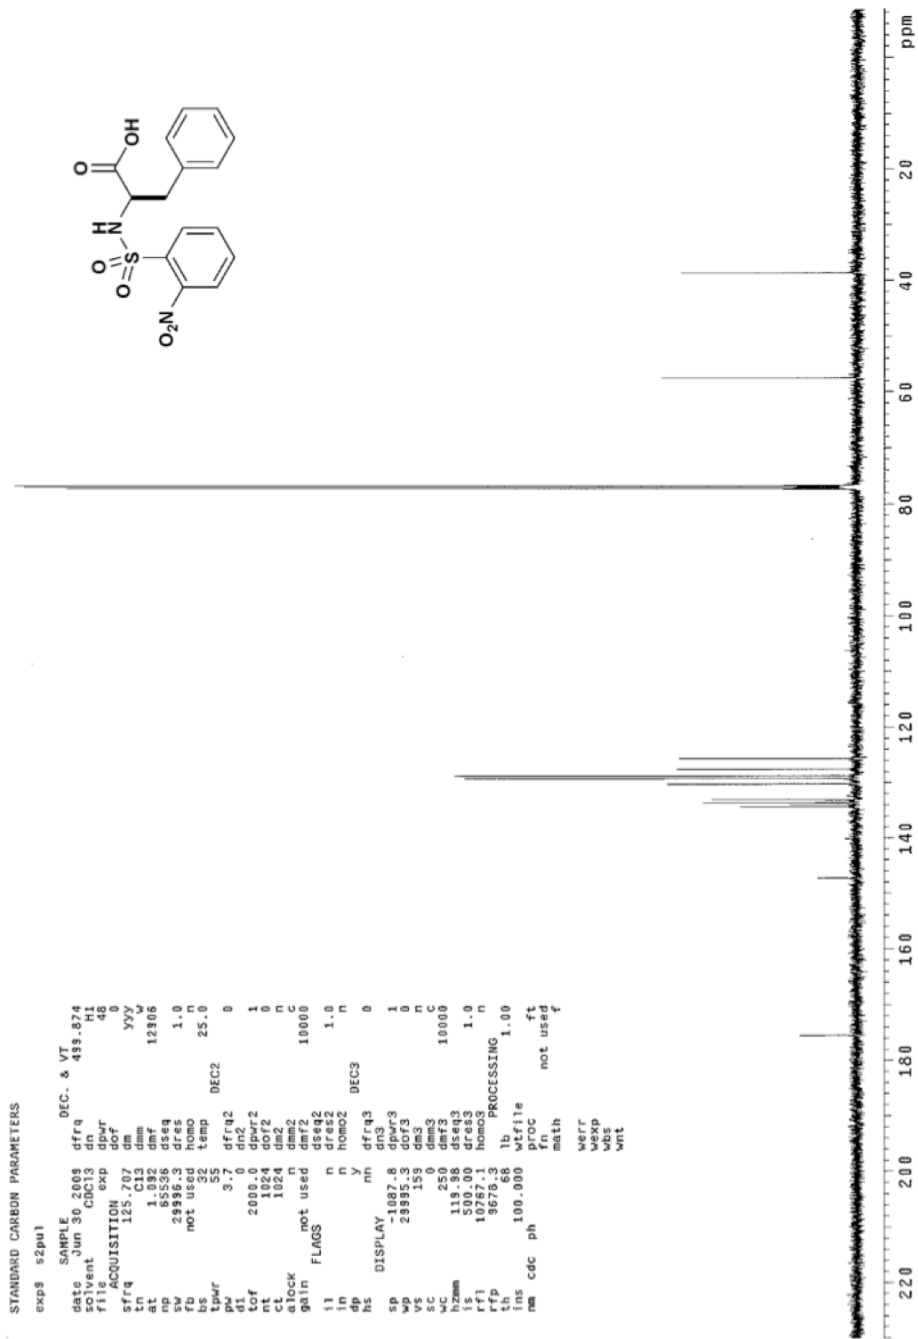

$^{13}\text{C}$  NMR (500 MHz,  $\text{CDCl}_3$ ) of compound (R)-i

Spectral data for (*R*)-*N*-methoxy-*N*-methyl-2-(2-nitrophenylsulfonamido)-3-phenylpropanamide (*R*)-ii

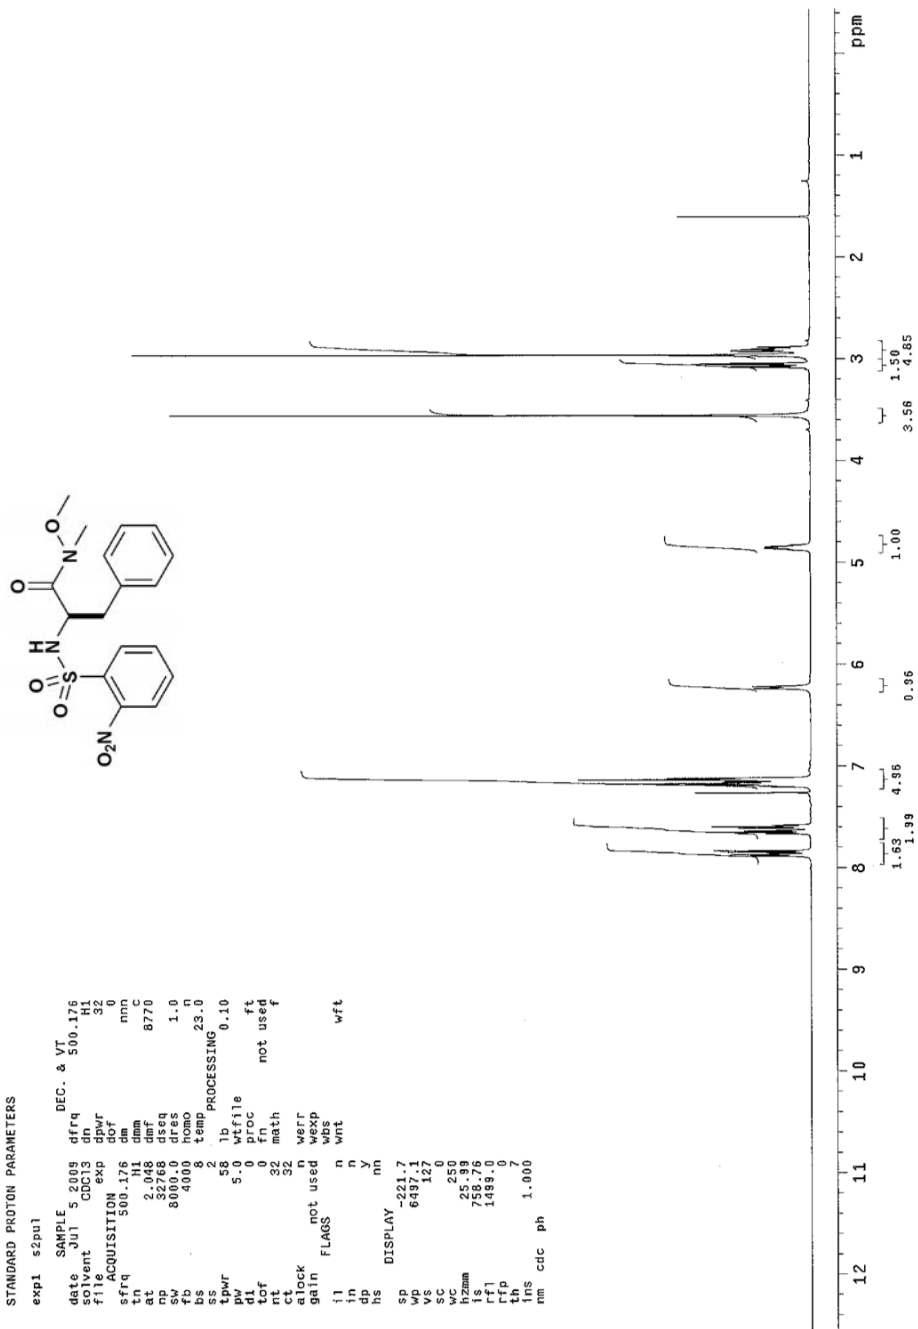

<sup>1</sup>H NMR (500 MHz, CDCl<sub>3</sub>) of compound (*R*)-ii

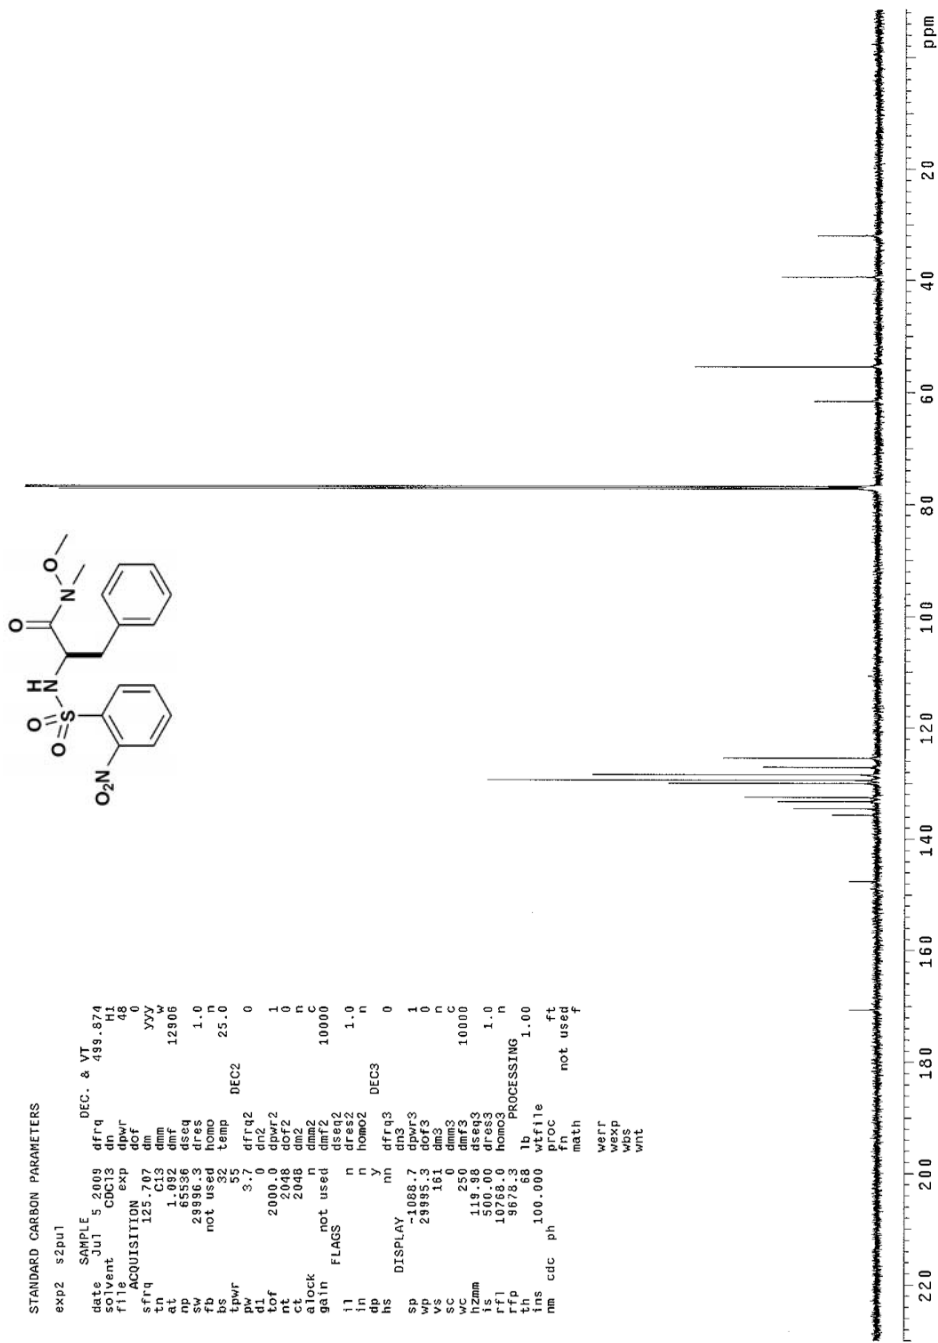

<sup>13</sup>C NMR (126 MHz, CDCl<sub>3</sub>) of compound (R)-ii

Spectral data for *S*-*N*-methoxy-*N*-methyl-2-(2-nitrophenylsulfonamido)-3-phenylpropanamide (*S*)-ii

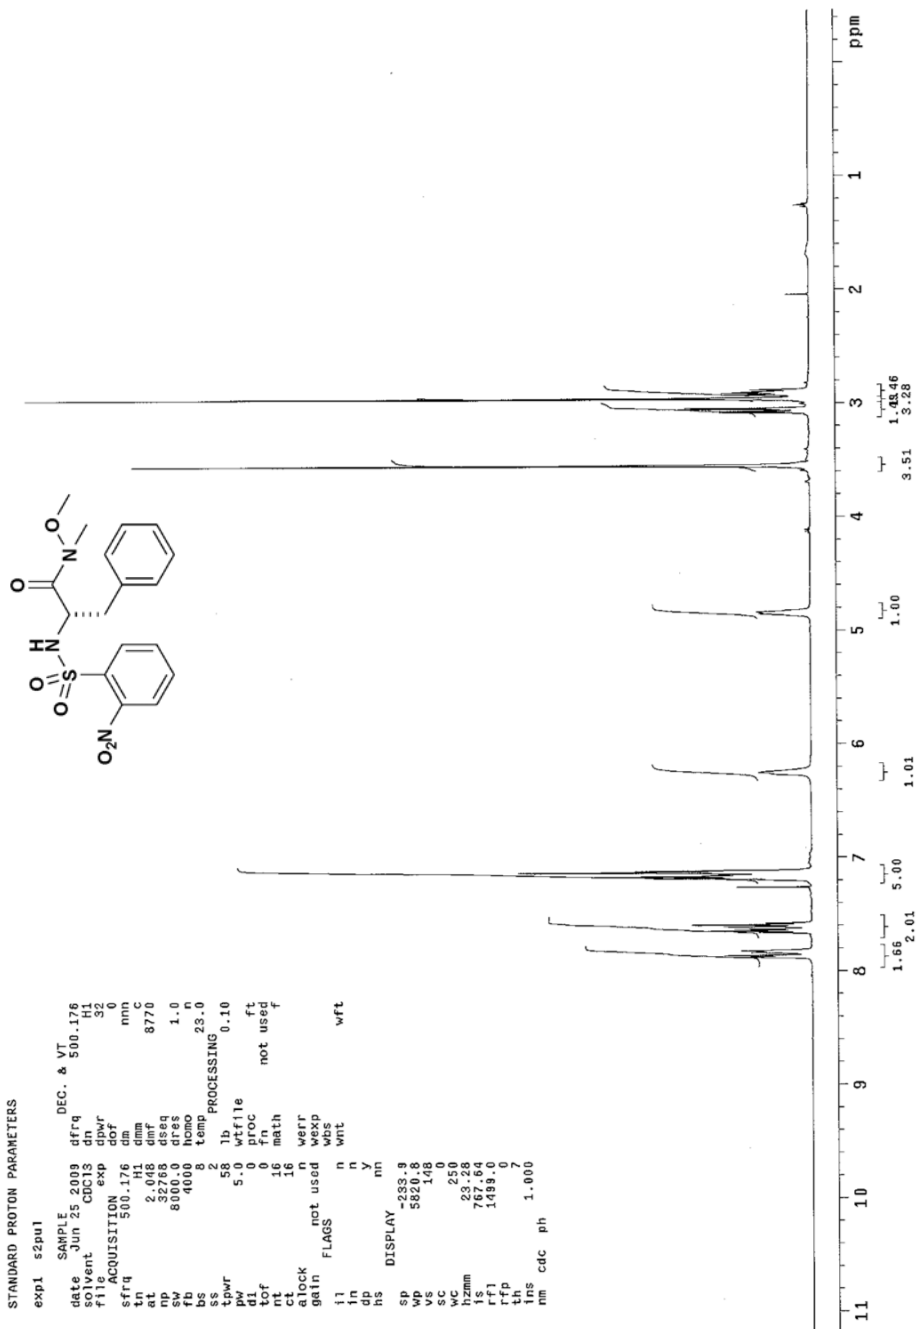

<sup>1</sup>H NMR (500 MHz, CDCl<sub>3</sub>) of compound (*S*)-ii



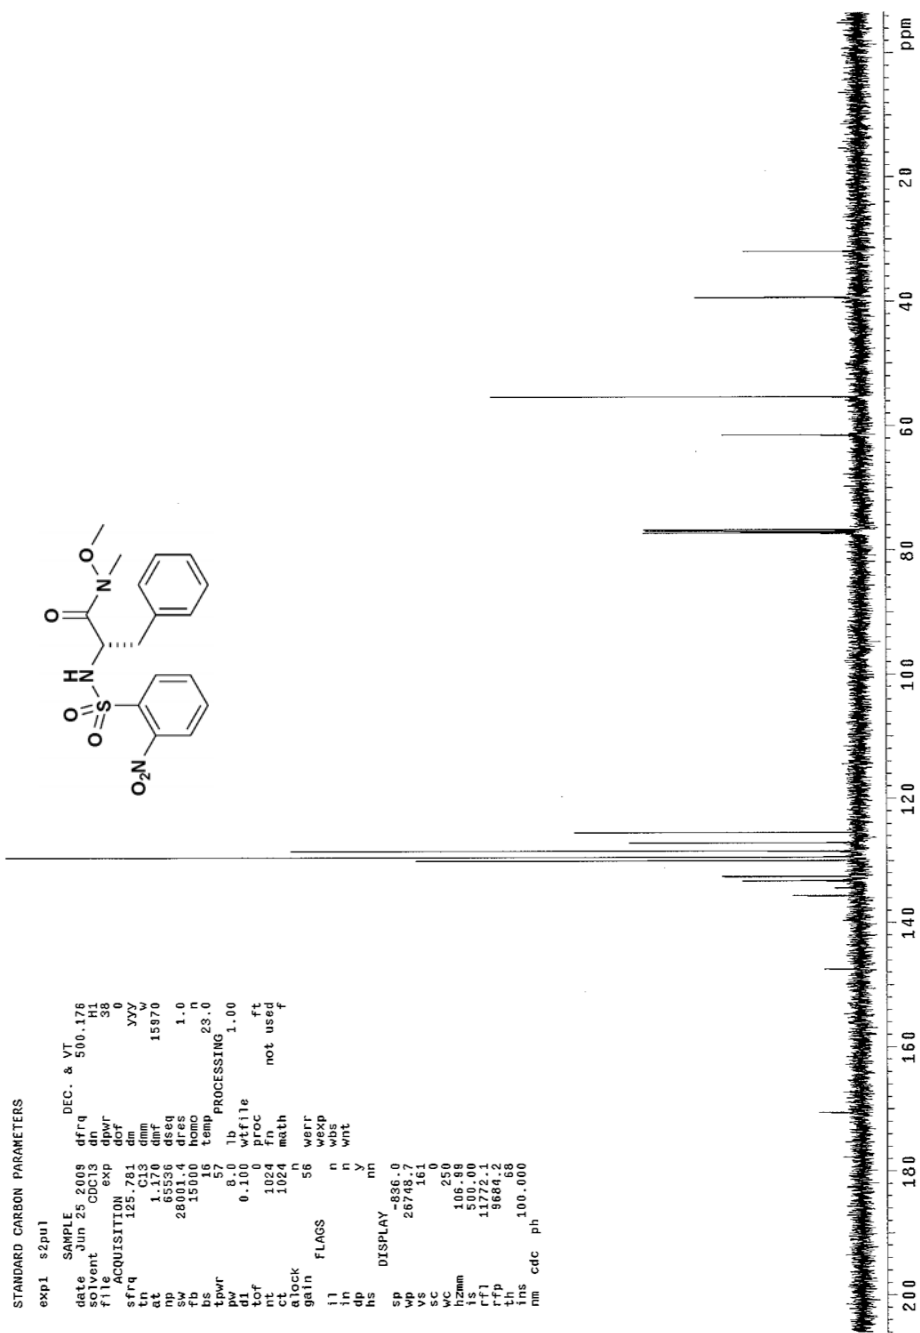

$^{13}\text{C}$  NMR (126 MHz,  $\text{CDCl}_3$ ) of compound (S)-ii

Spectral data for (*R*)-2-(*N*-allyl-2-nitrophenylsulfonamido)-*N*-methoxy-*N*-methyl-3-phenylpropanamide (**2a**)

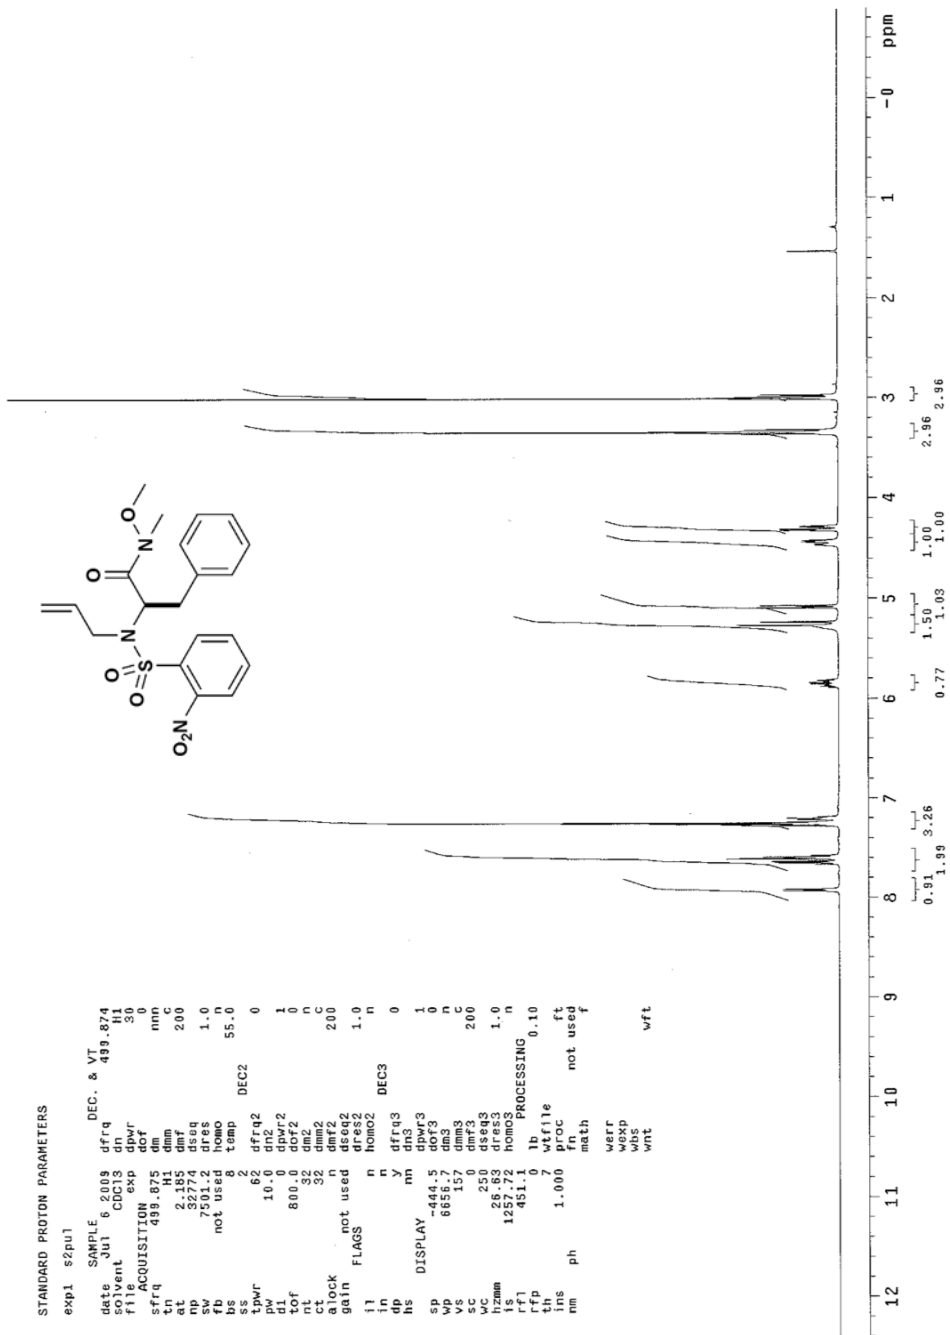

<sup>1</sup>H NMR (500 MHz, CDCl<sub>3</sub>) of compound **2a**

STANDARD CARBON PARAMETERS

```

exp2 szpui
SAMPLE 7 2009 DEC. & VI 499.874
date Jul 7 2009 dfrq 499.874
solvent C6D13 dn 48
file /export/home/~ dpwr
% 0
500C/chem/bar/P12~ dn
zifran1/R_DF3-259.0~ dmm
70709.fid dmf 12908
ACQUISITION 707 dseg 1.0
125.719 homo 1.0
et 1.082 temp 25.0
np 65596 th PROCESSING 1.00
% 299862
tb not used wtf file
bs not used proc ft
tpwr 55 fn not used f
pw 3.7 math
t 2000.0 werr
tof 2048 wexp
ct 1600 wbs
dlock not used n
gain not used n
flags n
11 n
in n
dp y
ns nm
sp DISPLAY -1065.9
wp 29796.7
vc 152
sc 156
wc 250
hzmm 118.18
ls 500.00
f1 1000.13
rfp 8678.9
th 11
ins 100.000
nm cdc ph
  
```

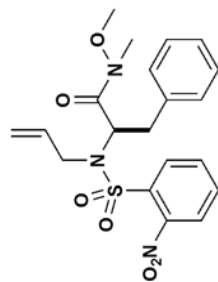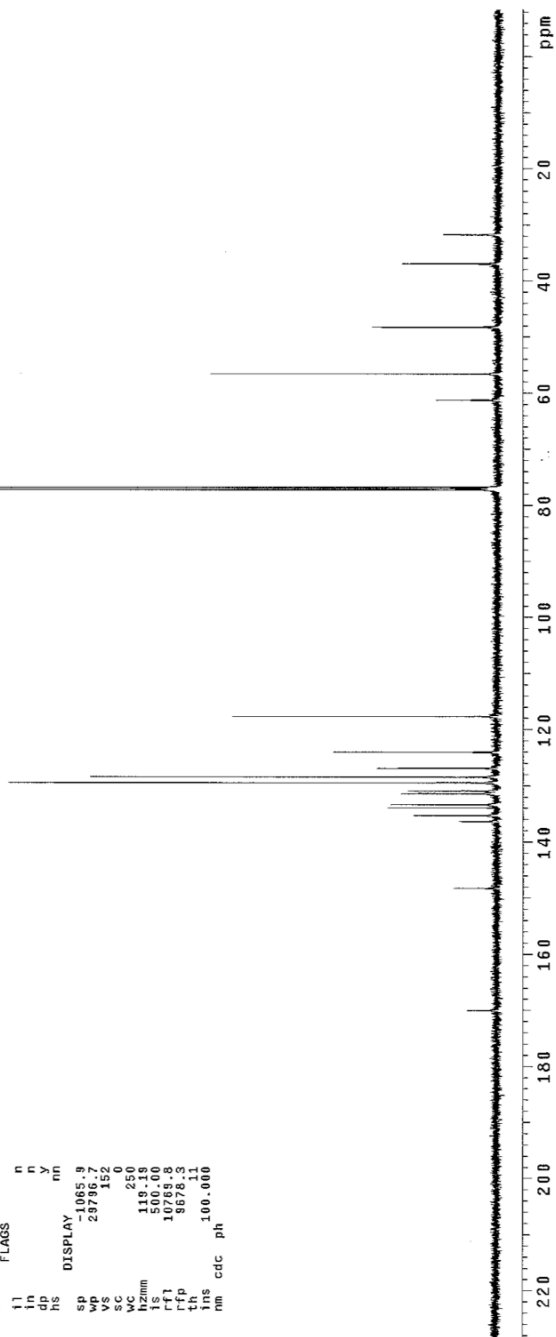

<sup>13</sup>C NMR (126 MHz, CDCl<sub>3</sub>) of compound 2a

Spectral data for (*S*)-2-(*N*-allyl-2-nitrophenylsulfonamido)-*N*-methoxy-*N*-methyl-3-phenylpropanamide (**2b**)

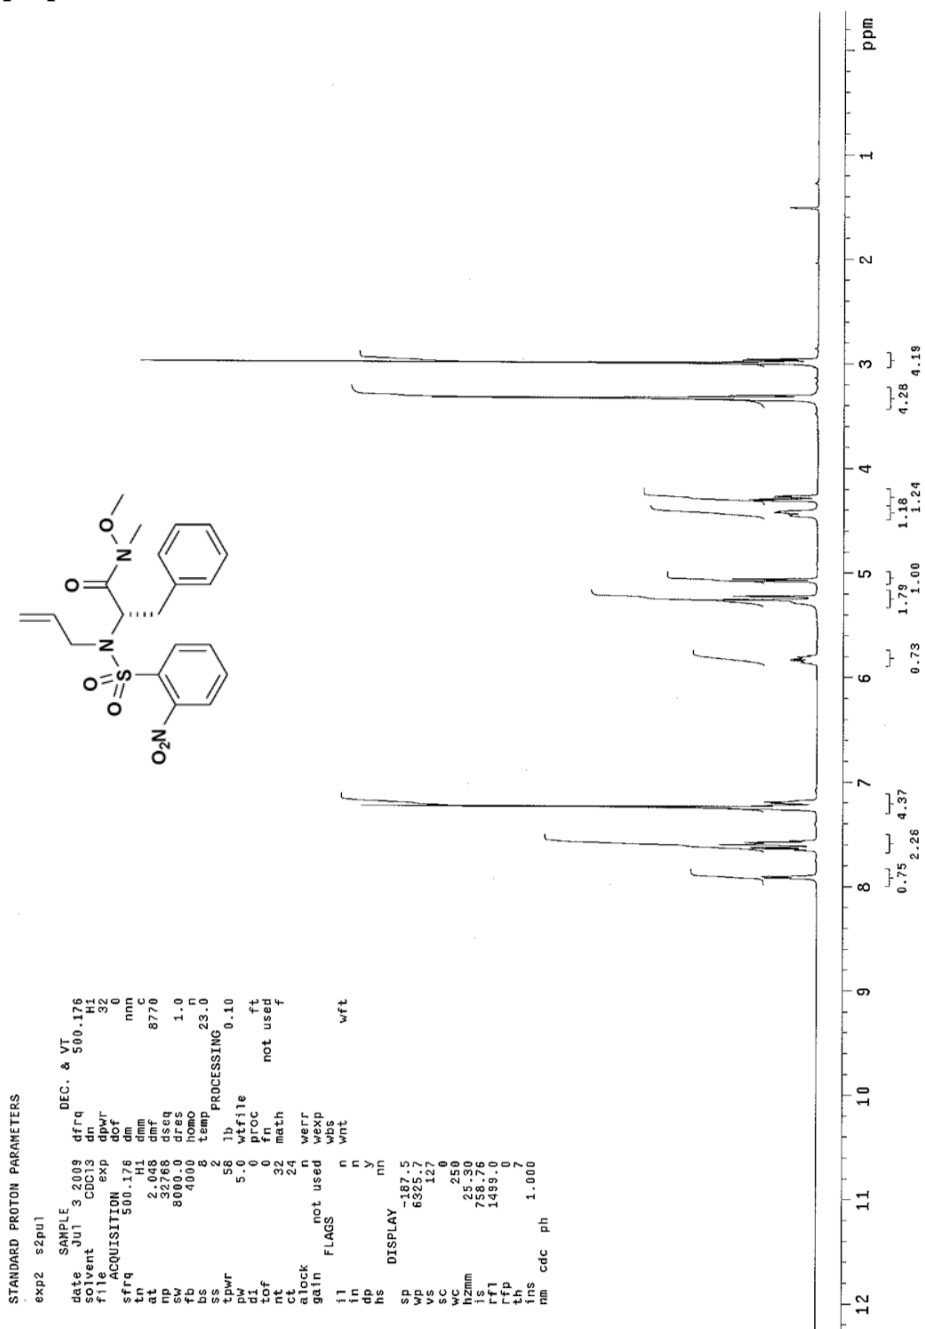

<sup>1</sup>H NMR (500 MHz, CDCl<sub>3</sub>) of compound **2b**

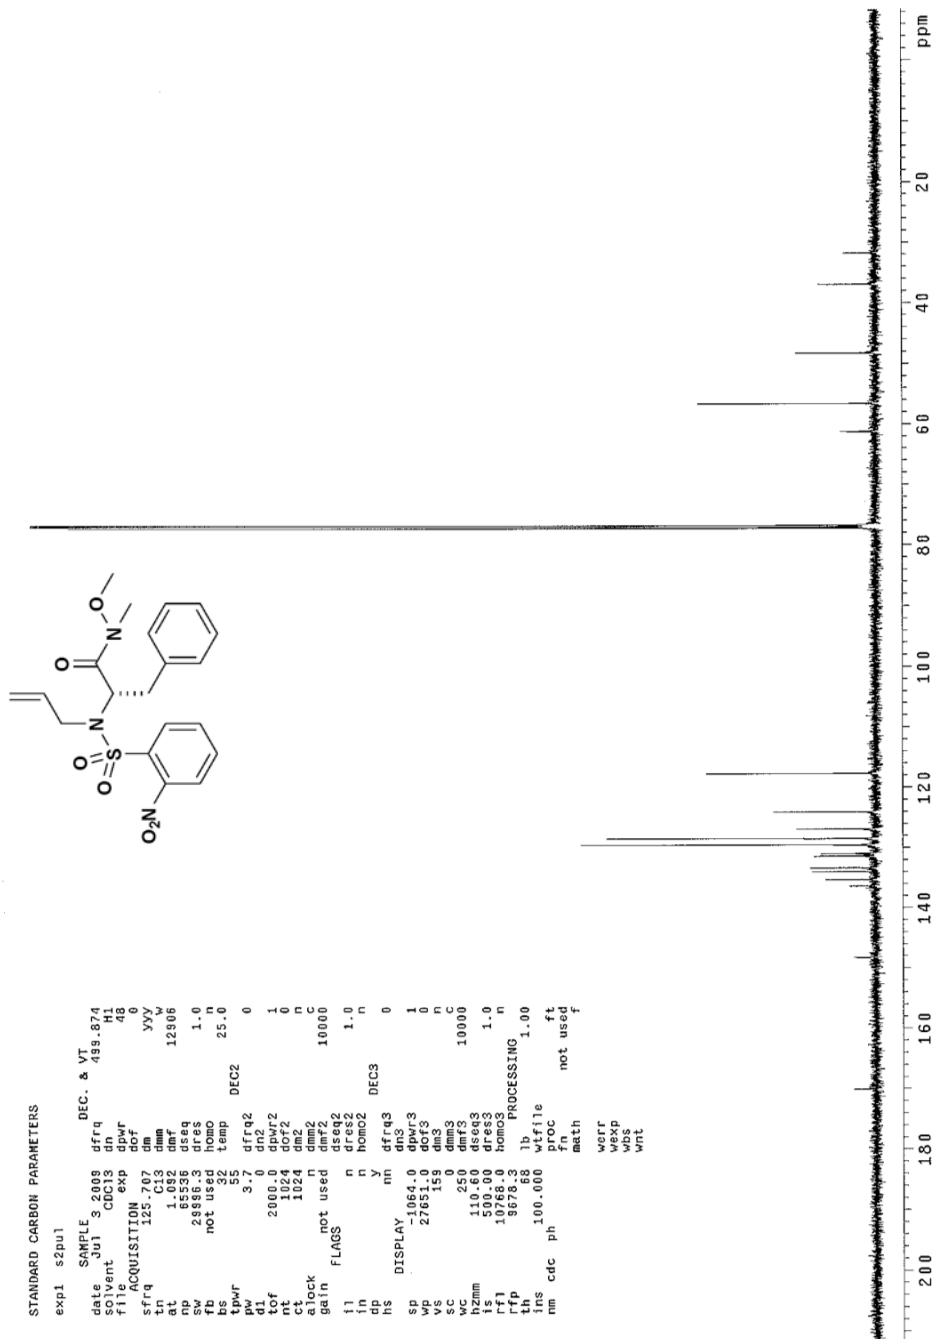

$^{13}\text{C}$  NMR (126 MHz,  $\text{CDCl}_3$ ) of compound **2b**

Spectral data for (*R*)-*N*-allyl-2-nitro-*N*-(3-oxo-1-phenyl-5-(triethylsilyl)pent-4-yn-2-yl)benzenesulfonamide (**3a**)

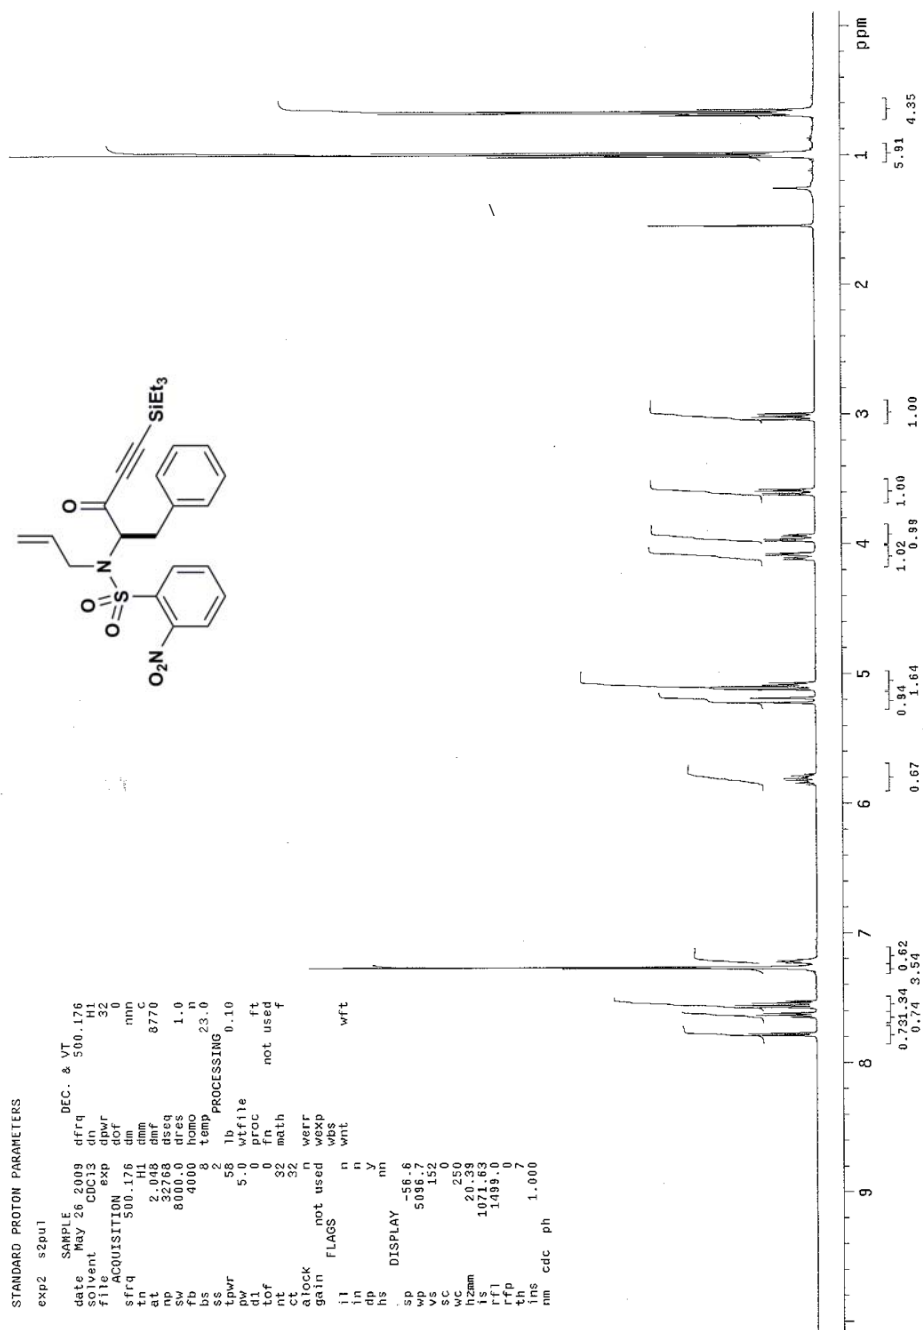

<sup>1</sup>H NMR (500 MHz, CDCl<sub>3</sub>) of compound **3a**

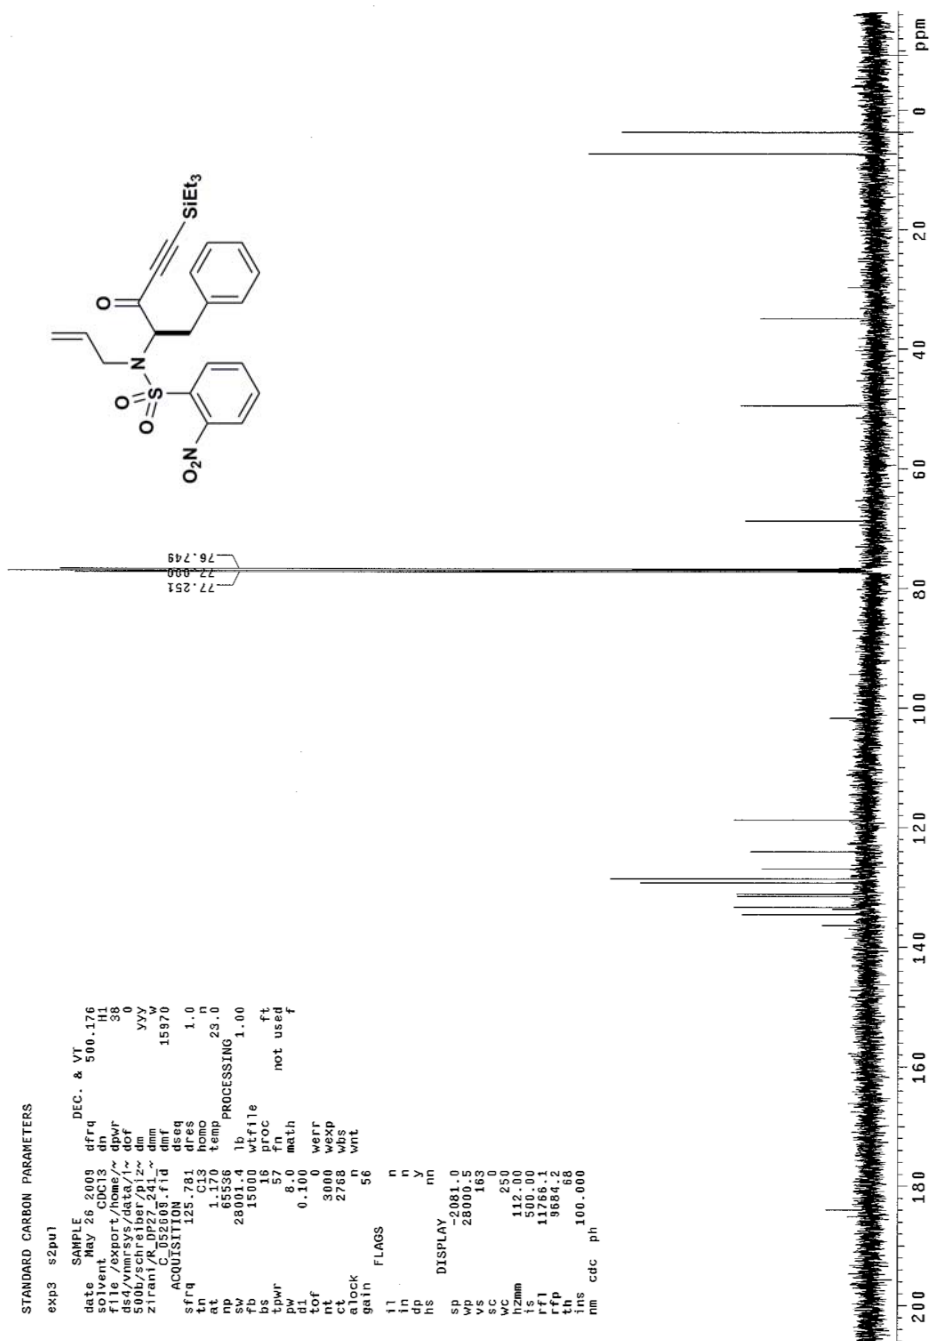

$^{13}\text{C}$  NMR (126 MHz,  $\text{CDCl}_3$ ) of compound **3a**

Spectral data for (*S*)-*N*-allyl-2-nitro-*N*-(3-oxo-1-phenyl-5-(triethylsilyl)pent-4-yn-2-yl)benzenesulfonamide (**3b**)

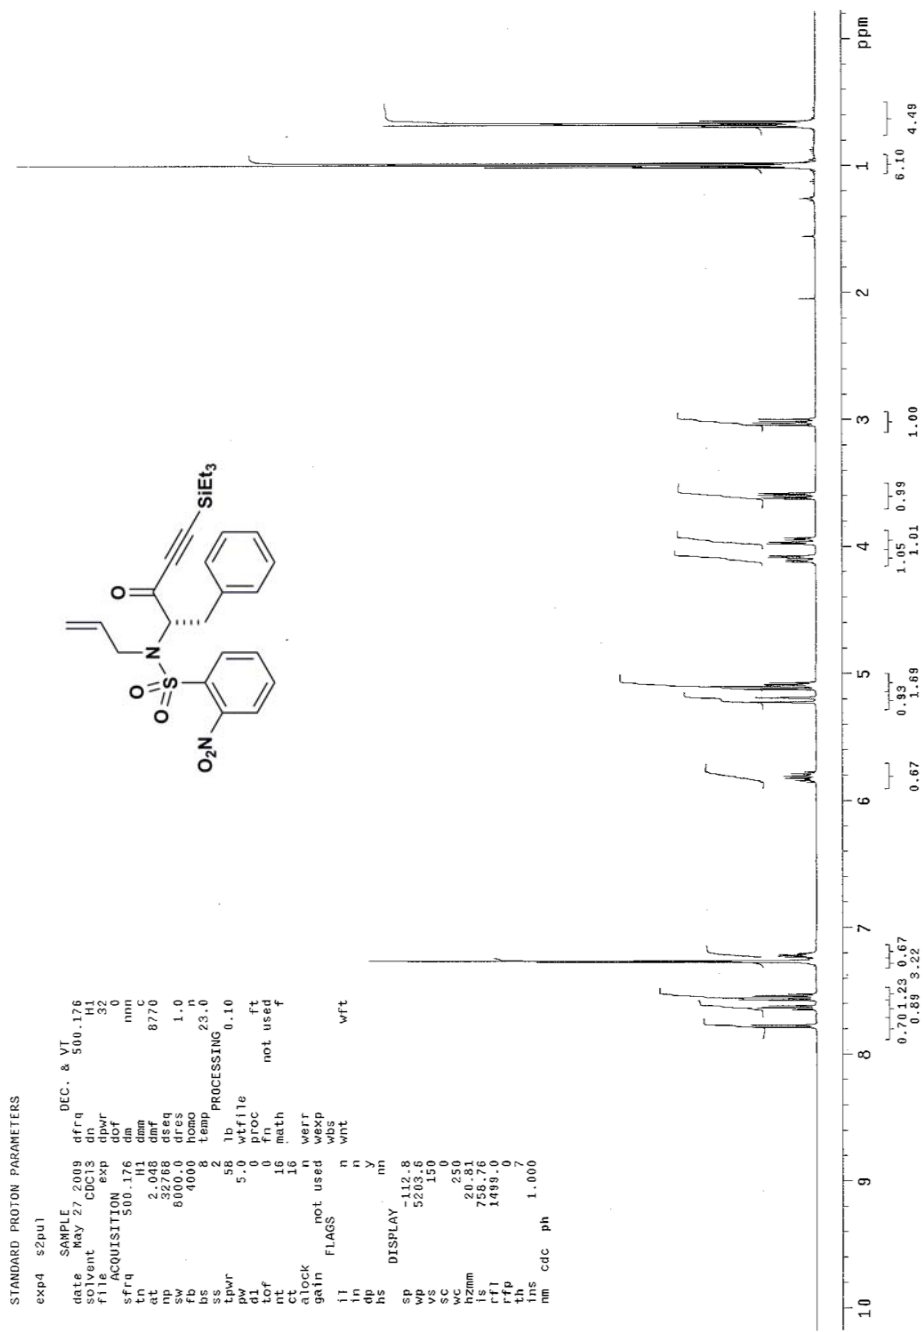

<sup>1</sup>H NMR (500 MHz, CDCl<sub>3</sub>) of compound **3b**







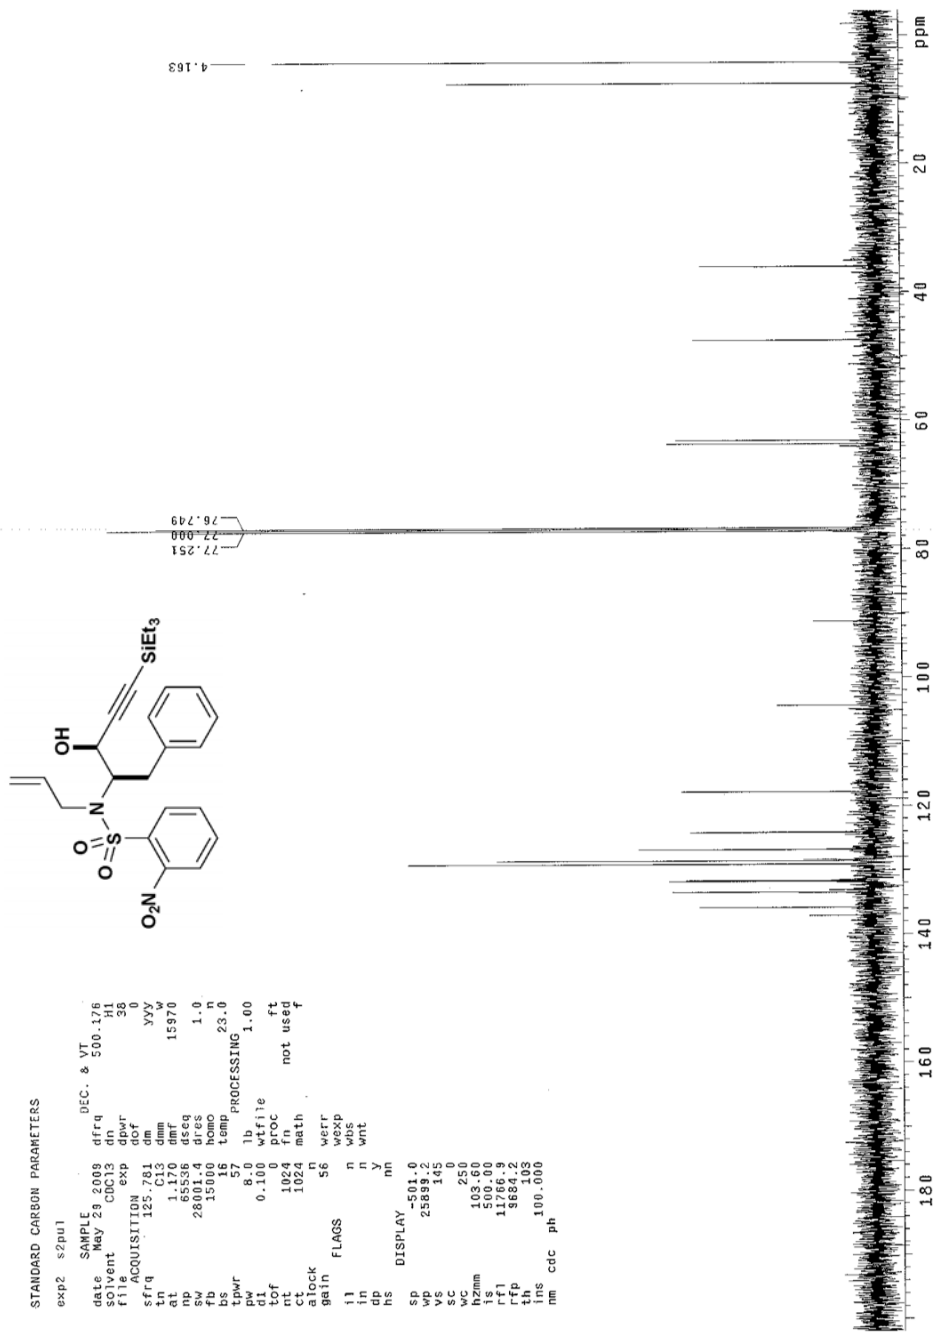

$^{13}\text{C}$  NMR (126 MHz,  $\text{CDCl}_3$ ) of compound **4a**

Spectral data for *N*-allyl-*N*-((2*R*,3*R*)-3-hydroxy-1-phenyl-5-(triethylsilyl)pent-4-yn-2-yl)-2-nitrobenzene sulfonamide (**4b**)

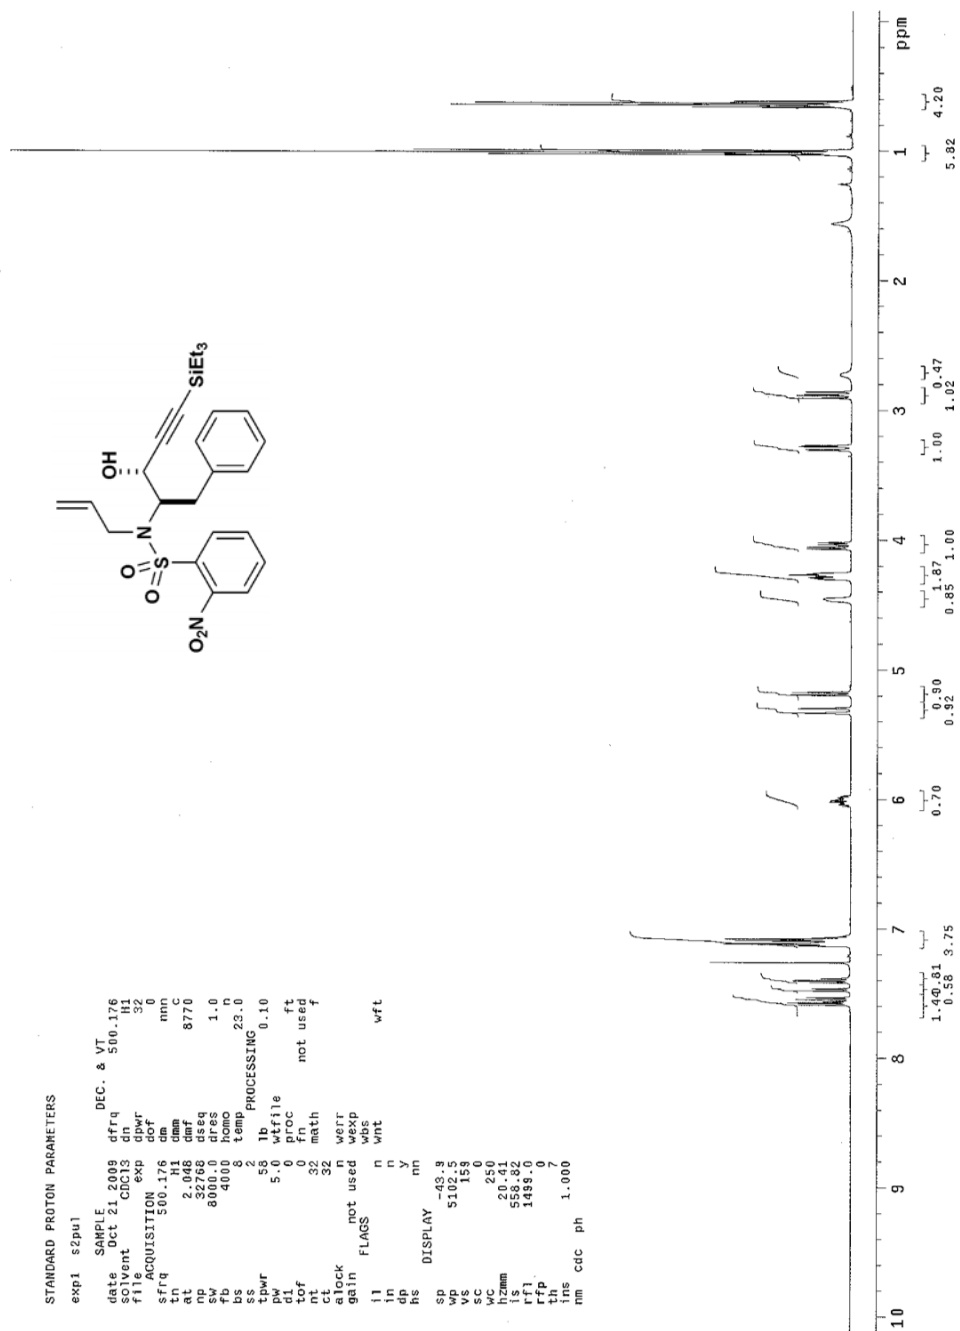

<sup>1</sup>H NMR (500 MHz, CDCl<sub>3</sub>) of compound **4b**

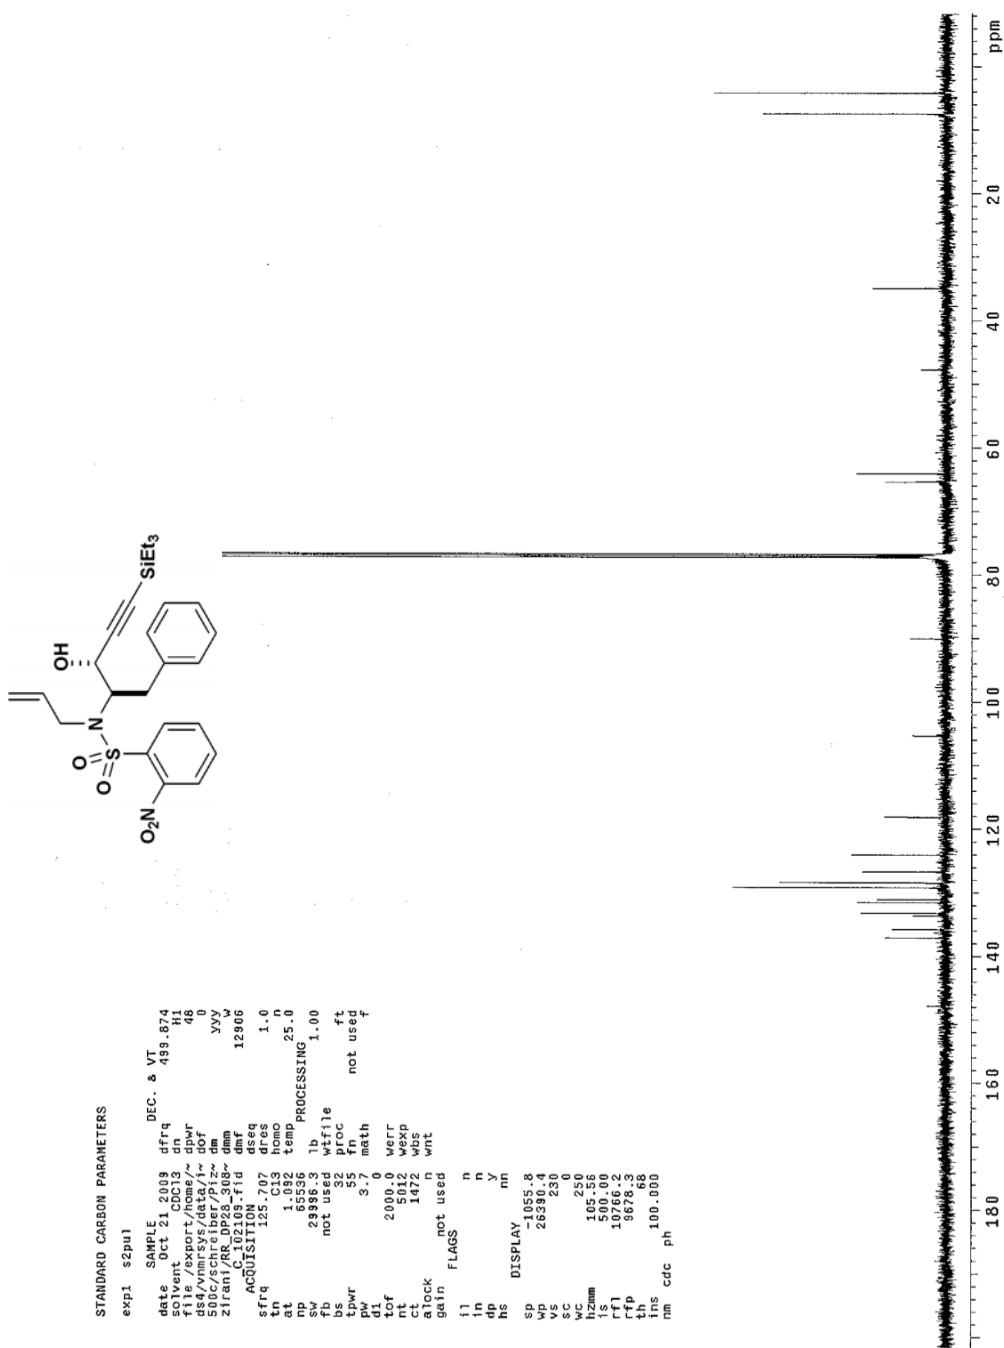

```

STANDARD CARBON PARAMETERS
exp1 s2bu1
SAMPLE DEC. & VI
date Oct 21 2008 dfrq 499.874
solvent CDCl3 dn R1
file /export/home/~dpwr 48
ds4/vmr/sy/data/1~ dof 0
00C/5/cre/dps/302~ nm Yyy
Zifam/CR DP5/302~ dmf 12966
C_102109-fid dmf 12966
ACQUISITION dseq
$frq 125.707 dres 1.0
at 1.092 temp 25.0
np 65536
sw 23996.3 lb PROCESSING 1.00
hb not used wfile
tpwr 55 proc ft
pw 3.7 math not used f
di 2000.0 verr
tof 5012 wbp
ct 1472 wbs
gain not used wnt
il FLAG n
in n
dp y
hs nn
SP DISPLAY -1055.8
wp 26390.4
vs 230
SC 0
h2nm 105.56
ls 500.00
rfi 40766.2
tpp 9877.68
lms 100.000
nm cdc ph
  
```

<sup>13</sup>C NMR (126 MHz, CDCl<sub>3</sub>) of compound **4b**

Spectral data for *N*-allyl-*N*-((2*S*,3*S*)-3-hydroxy-1-phenyl-5-(triethylsilyl)pent-4-yn-2-yl)-2-nitrobenzene sulfonamide (**4c**)

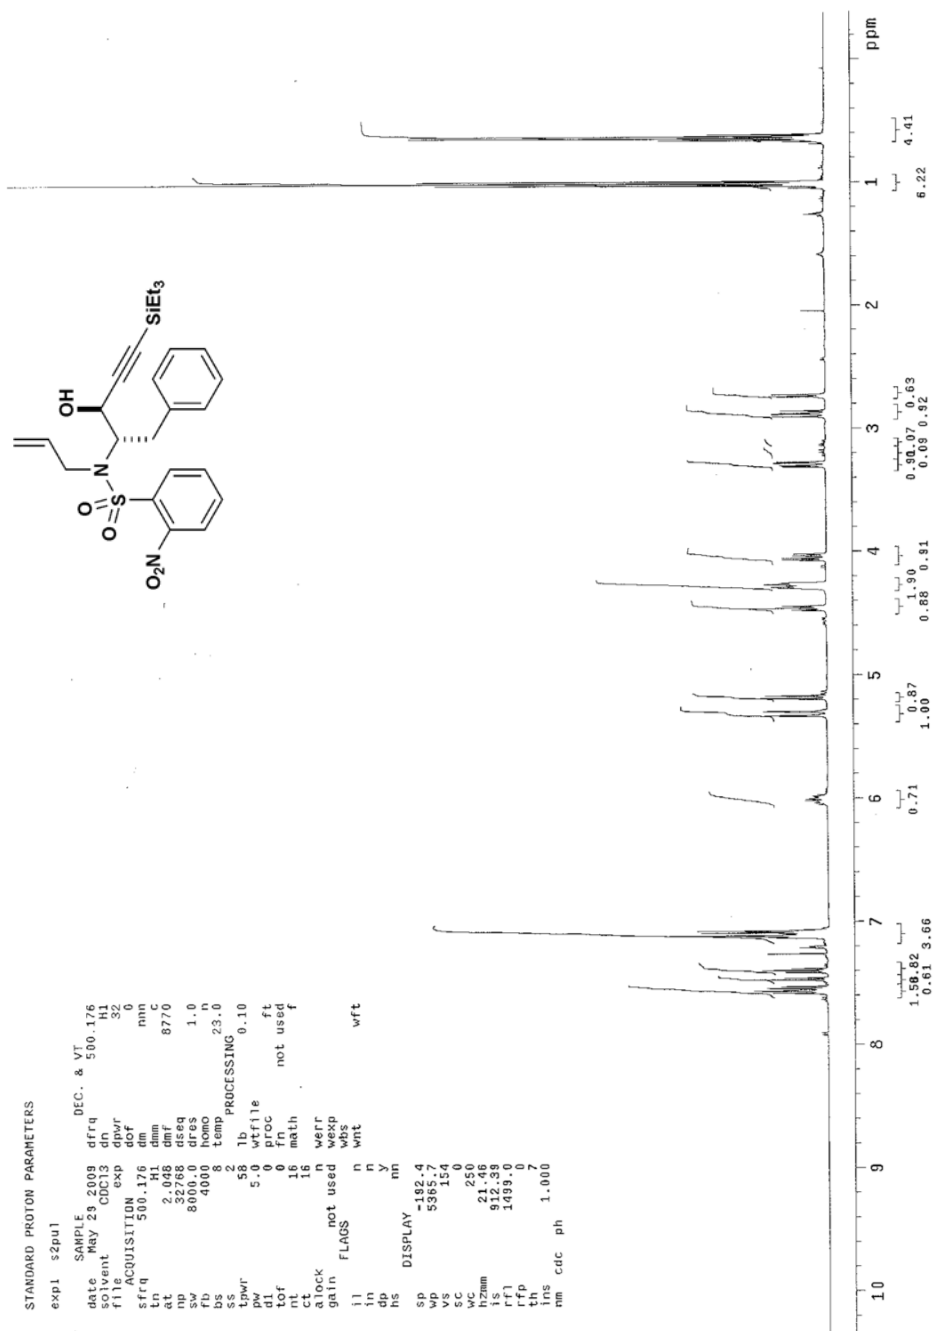

<sup>1</sup>H NMR (500 MHz, CDCl<sub>3</sub>) of compound **4c**

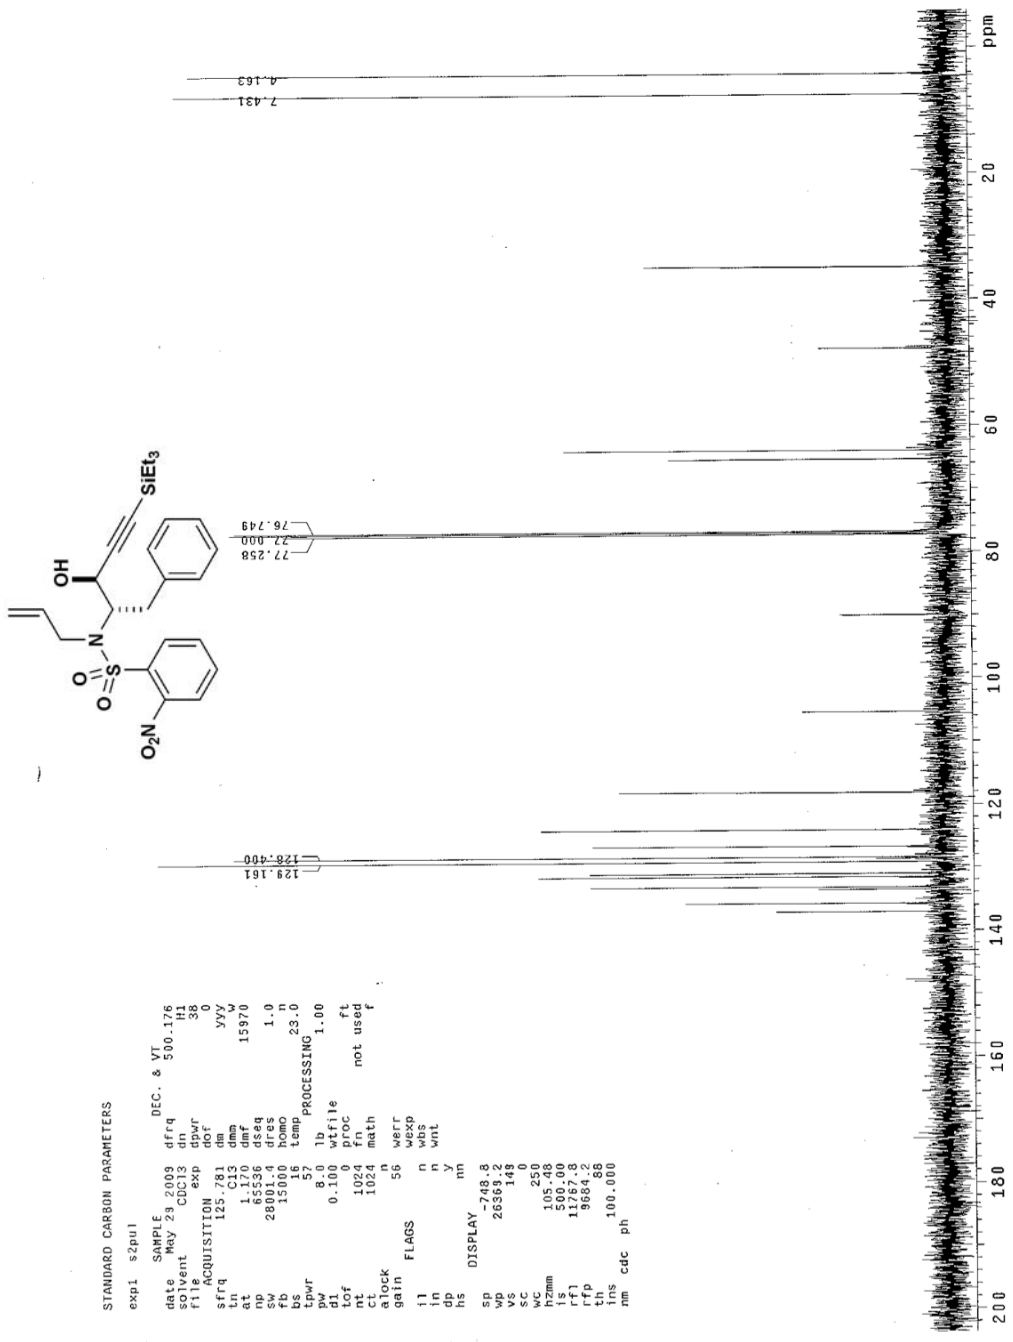

<sup>13</sup>C NMR (126 MHz, CDCl<sub>3</sub>) of compound **4c**





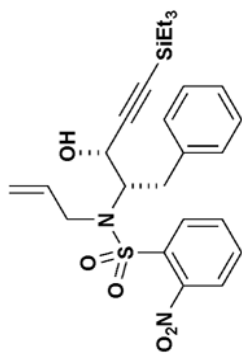

STANDARD CARBON PARAMETERS

```

exp1 s2pu1
date Dec 16 2009 DEC. & VT
solvent Dec CDC13 dn H1
file ACQUISITION exp dpr 49
sfrq 125.707 dpr 49
tr 1.092 dmf 12000
at 1.092 dmf 12000
np 85536 dseq 1.0
fb not used homo 1.0
bs S2 temp 25.0 DEC2
tpwr 55
pw 4.2 dfrq2 0
tof 2000.0 dpr2 1
nt 2048 dof2 0
ct 0 dm2 n
atock not used dm2 10000
gain FLAGS dseq2 1.0
il n homo2 n
in y dfrq3 0
ns DISPLAY dn dn3 0
sp -713.5 dpr3 1
wp 26095.7 dof3 0
sc 140 dm3 C
wc 250 dm3 10000
h2mm 104.38 dseq3 1.0
ls 500.00 dres3 n
rfp 1055.0 homo PROCESSING n
th ns cdc ph 6 lb 1-00
nm cdc ph 77.000 wifile ft
proc not used
math
werr
wsp
wnt
  
```

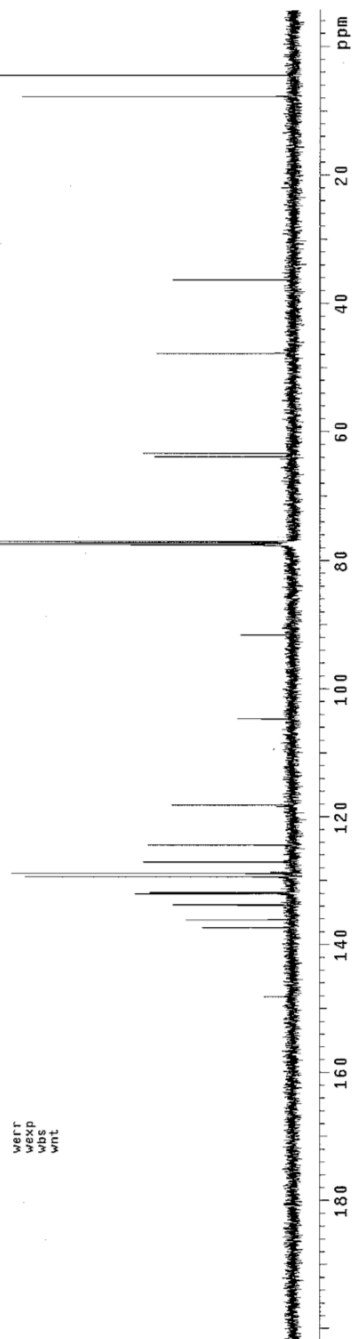

<sup>13</sup>C NMR (126 MHz, CDCl<sub>3</sub>) of compound **4d**

Spectral data for *N*-allyl-*N*-((2*R*,3*S*)-3-hydroxy-1-phenylpent-4-yn-2-yl)-2-nitrobenzenesulfonamide (**1a**)

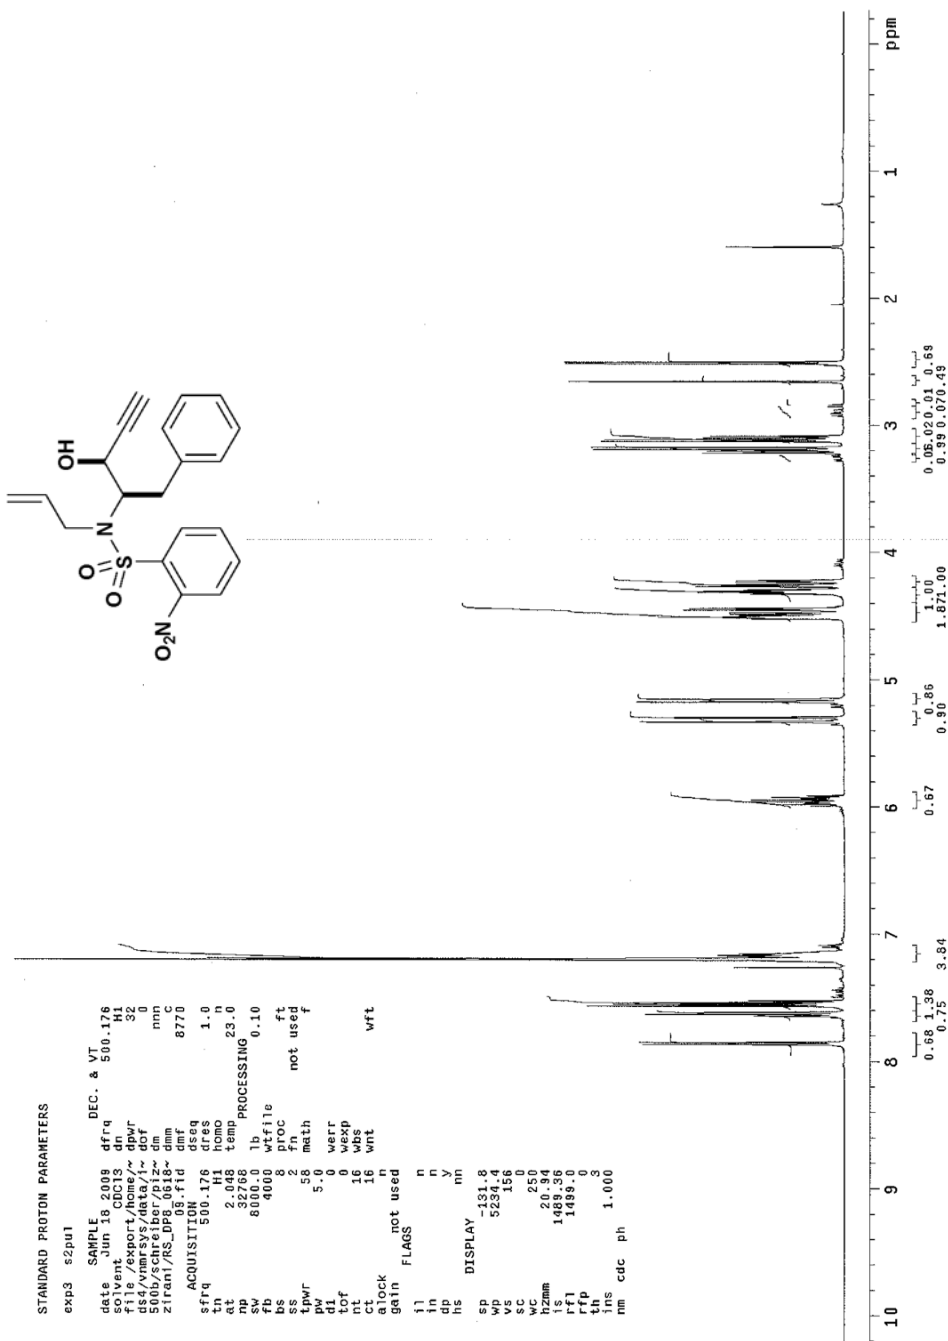

<sup>1</sup>H NMR (500 MHz, CDCl<sub>3</sub>) of compound **1a**

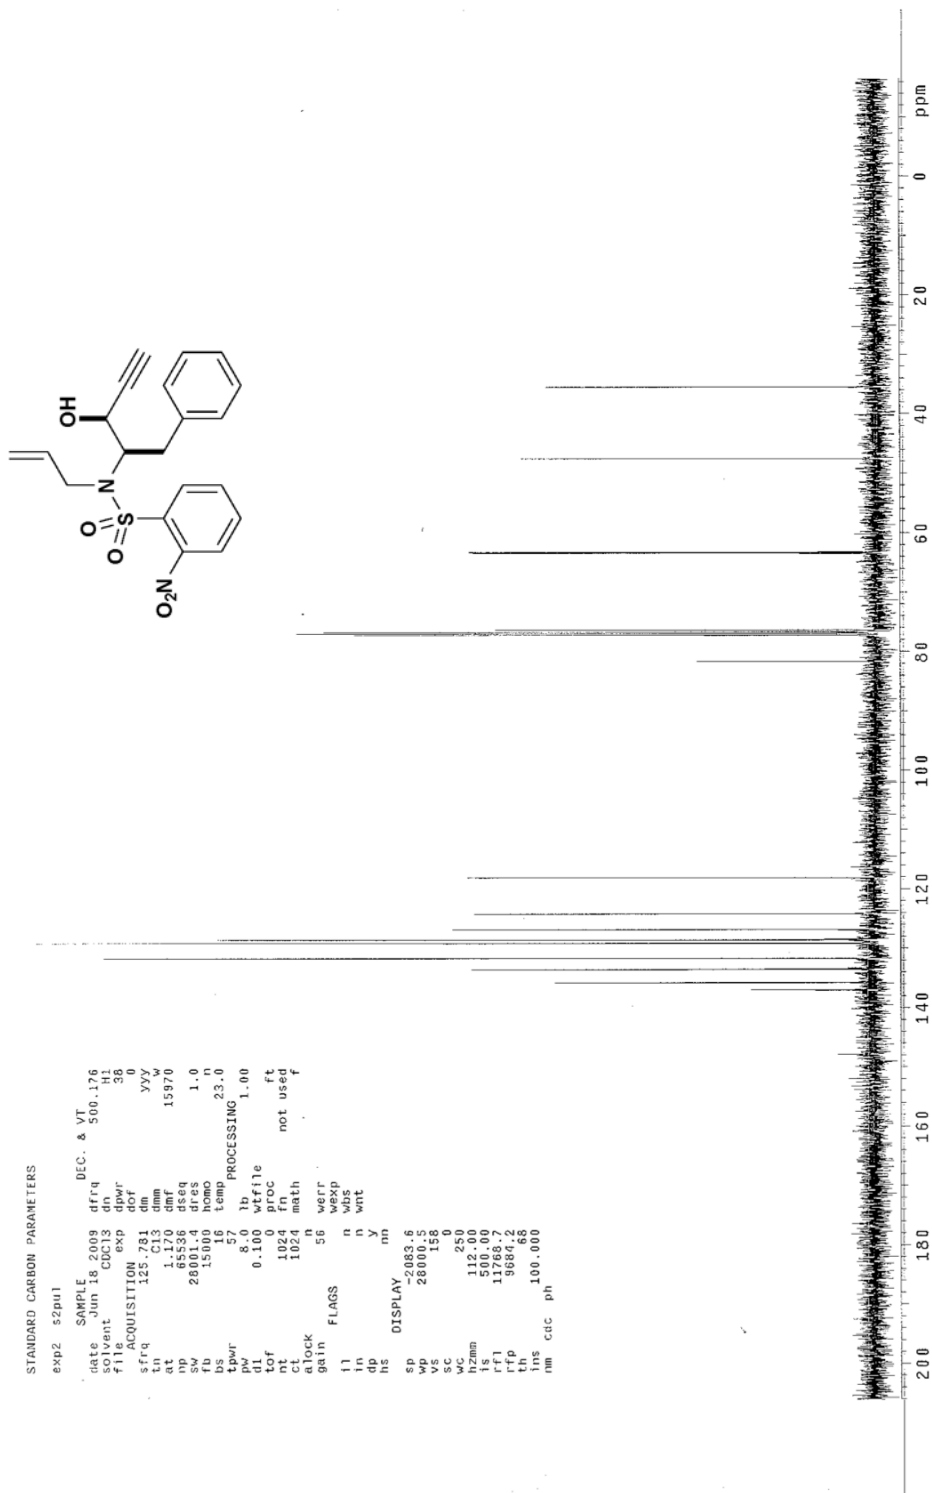

$^{13}\text{C}$  NMR (126 MHz,  $\text{CDCl}_3$ ) of compound **1a**

Sectral data for *N*-allyl-*N*-((2*R*,3*R*)-3-hydroxy-1-phenylpent-4-yn-2-yl)-2-nitrobenzenesulfonamide (**1b**)

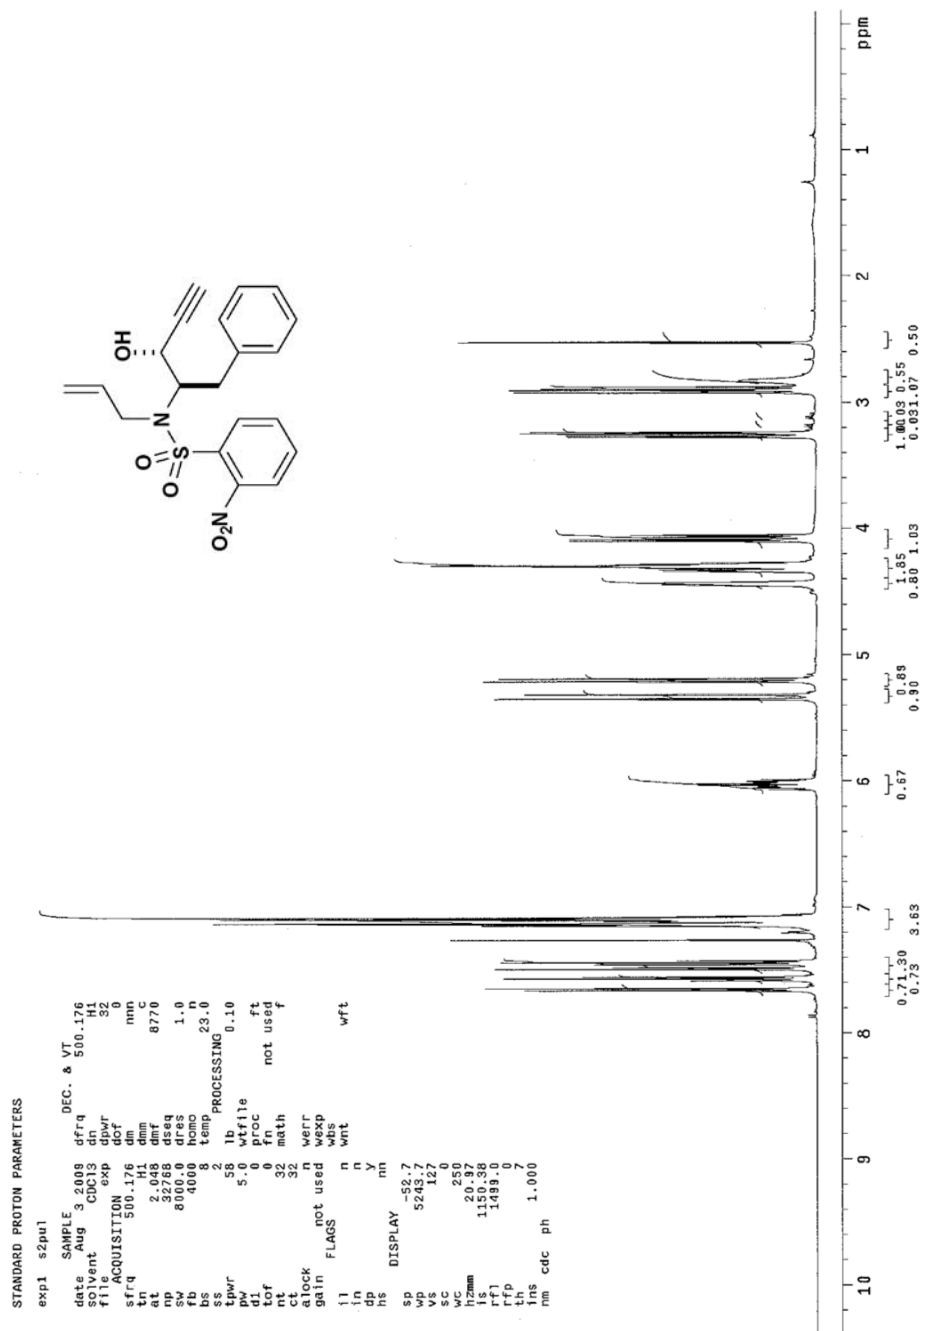

<sup>1</sup>H NMR (500 MHz, CDCl<sub>3</sub>) of compound **1b**

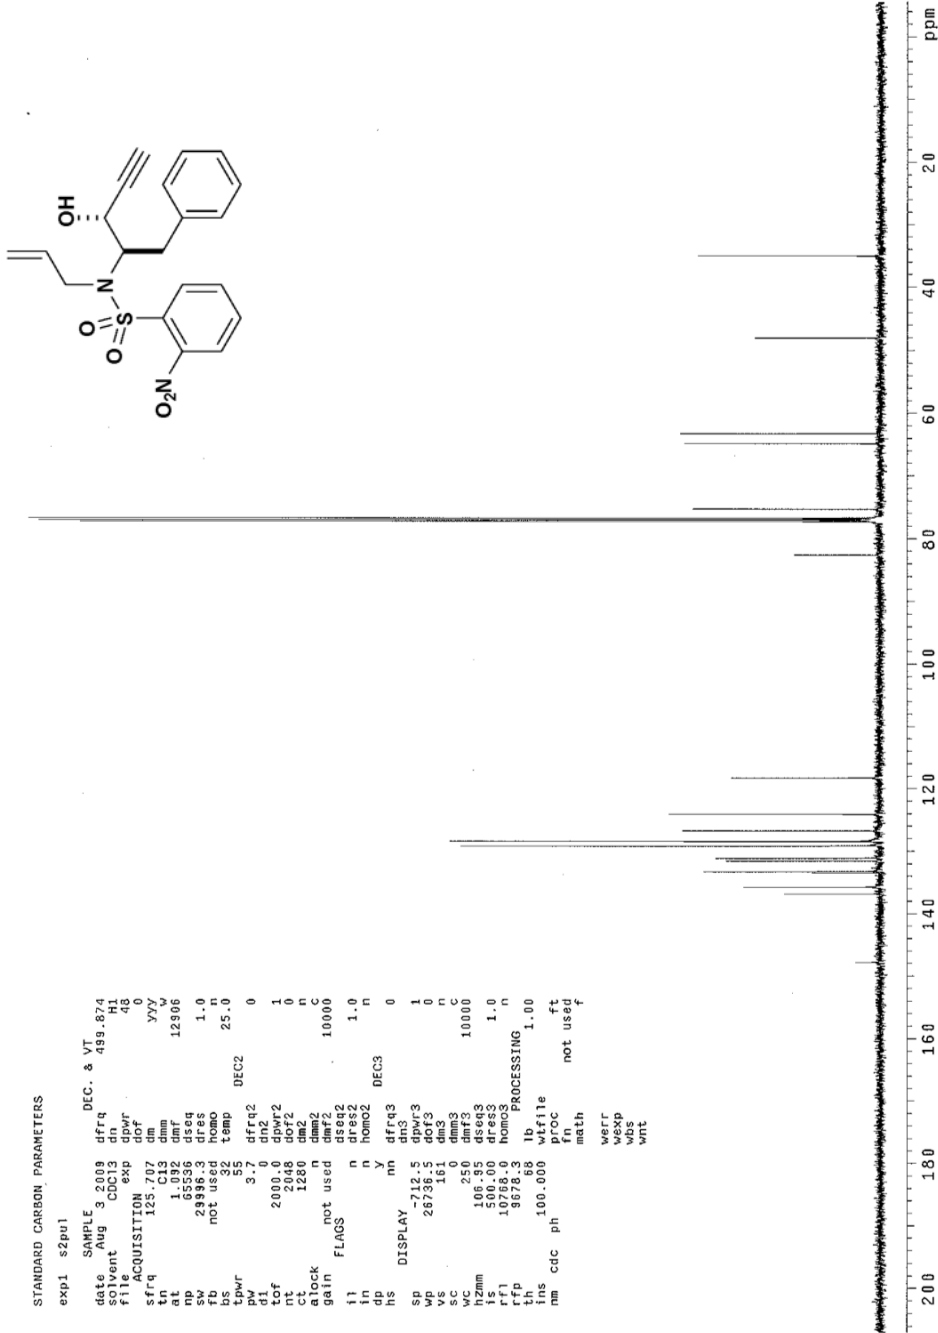

$^{13}\text{C}$  NMR (126 MHz,  $\text{CDCl}_3$ ) of compound **1b**

Spectral data for *N*-allyl-*N*-((2*S*,3*S*)-3-hydroxy-1-phenylpent-4-yn-2-yl)-2-nitrobenzenesulfonamide (**1c**)

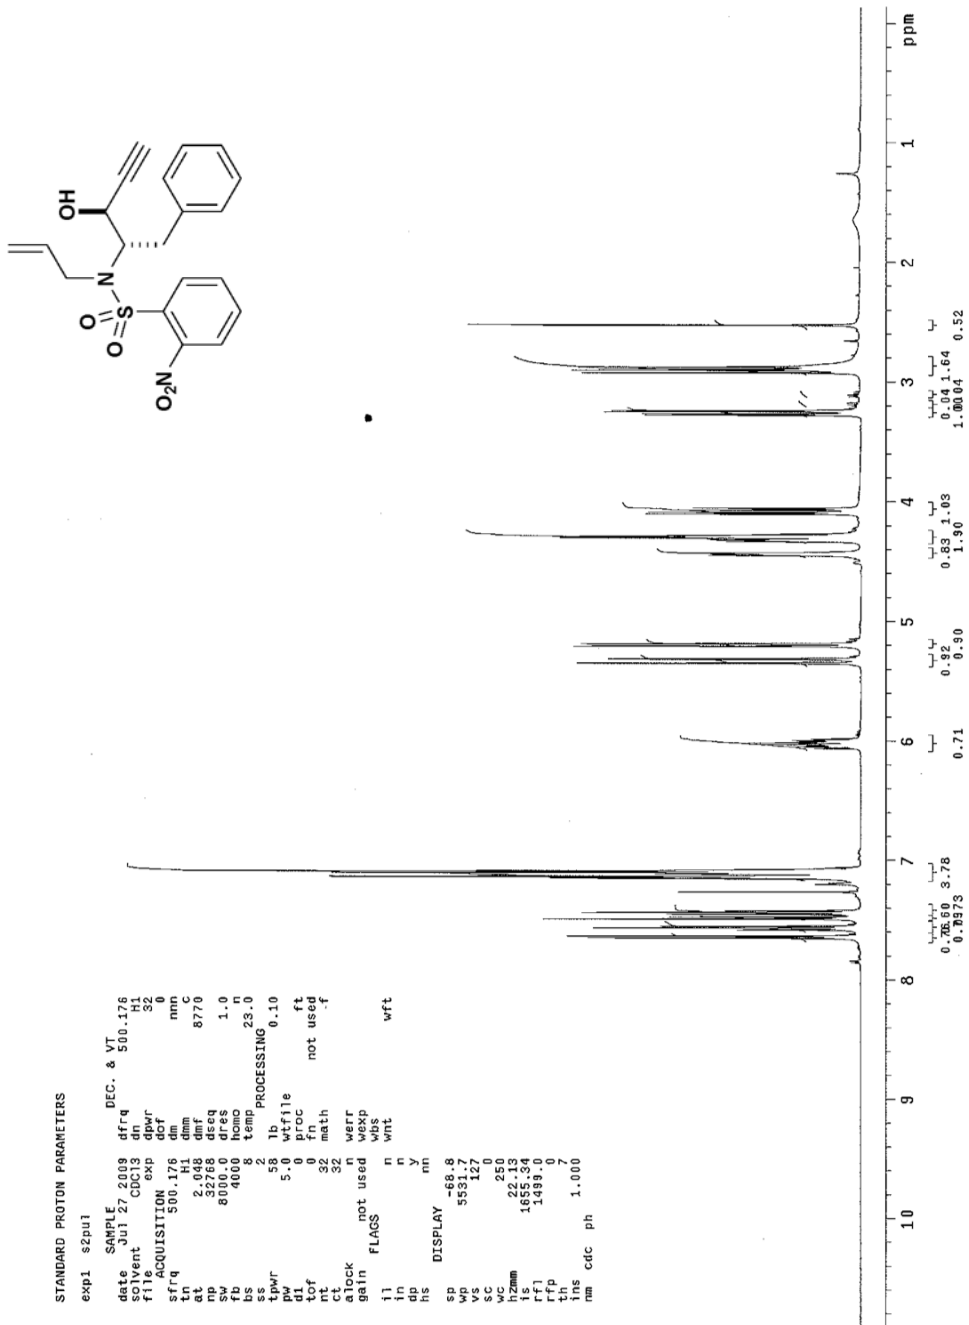

<sup>1</sup>H NMR (500 MHz, CDCl<sub>3</sub>) of compound **1c**

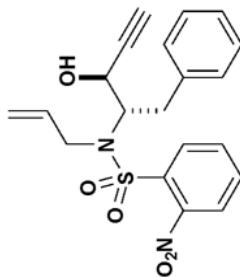

STANDARD CARBON PARAMETERS

```

exp2 s2pu1
SAMPLE DEC. & VT
date Jul 27 2009 dfrq 489.874
solvent CDCl3 dn HI
file 48 dpr 48
ACQUISITION exp /
sfrq 125.707 dm VVY
tn 12906
at 1.052 dmf
sp 289528 dseq 12906
fb not used homo 1.0
bs 32 temp 25.0
tpwr 55
d1 3.0 dfrq2 0
d2 2000.0 dpwr2 1
nt 5012 dot2 0
ct 1600 dm2 n
check n
gain not used dm2 10000
ll n dseq2 1.0
ln n homo2 1.0
ls n dfrq3 0
DISPLAY nm dfrq3 0
sp -1052.2 dpwr3 1
wp 27835.3 dot3 0
sc 157 dm3 C
wc 0 dm3 C
h2mm 250 dmf3 10000
rf1 111.34 dseq3
rf2 107.07 homo3 1.0
rfp 9678.3 homo3
th lb 58 lb 1.00
ins 100.000 wfile ft
nm cdc ph proc not used
          fn math
          werr
          wps
          wbs
          wnt
  
```

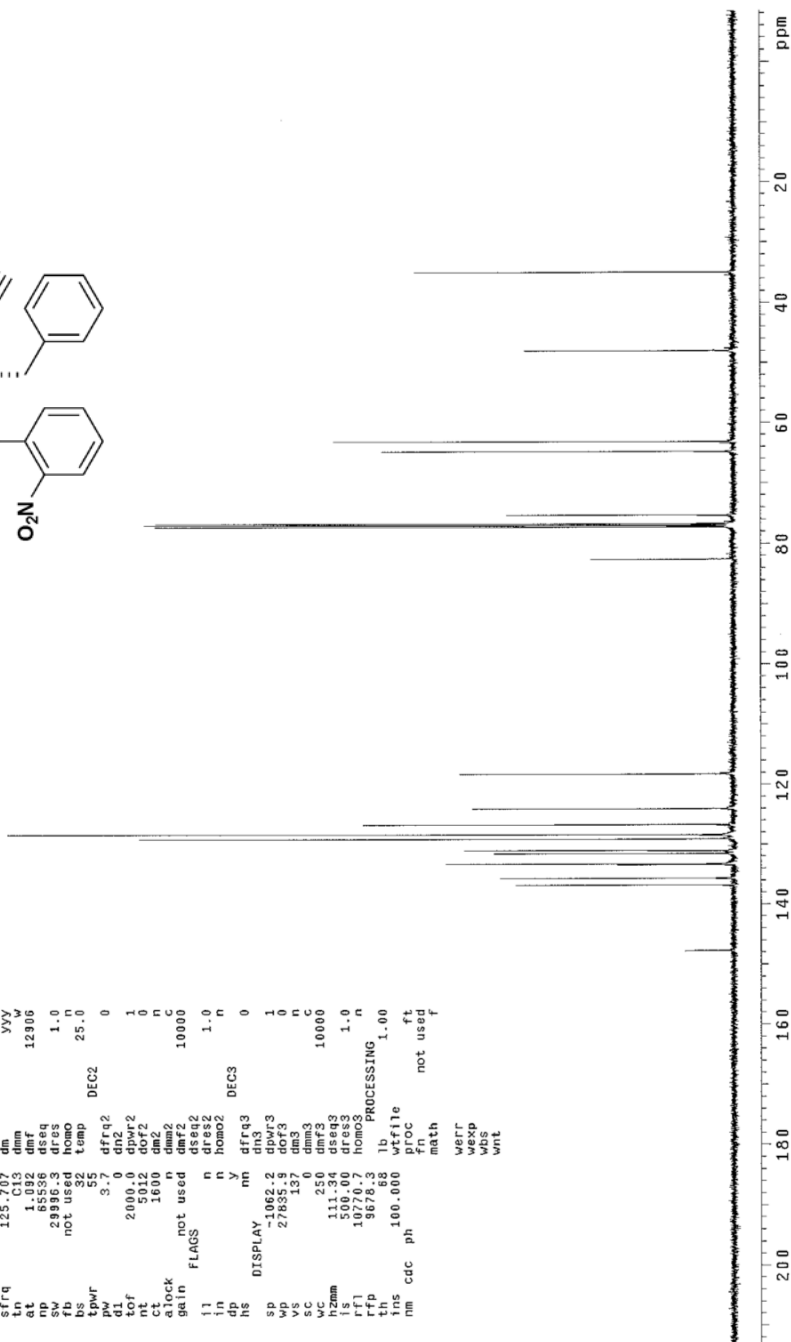

$^{13}\text{C}$  NMR (126 MHz,  $\text{CDCl}_3$ ) of compound 1c

Spectral data for *N*-allyl-*N*-((2*S*,3*R*)-3-hydroxy-1-phenylpent-4-yn-2-yl)-2-nitrobenzenesulfonamide (**1d**)

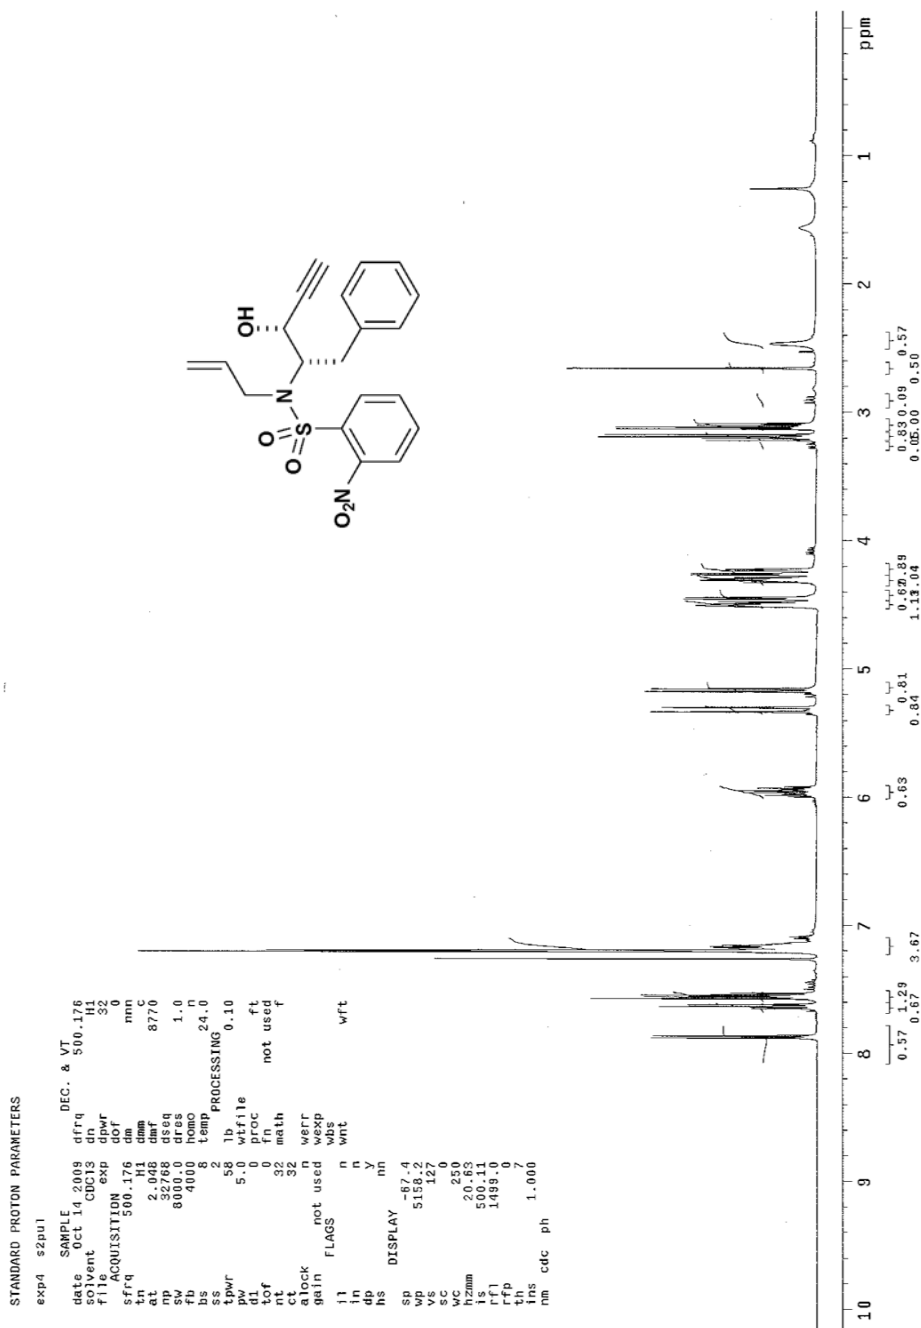

<sup>1</sup>H NMR (500 MHz, CDCl<sub>3</sub>) of compound **1d**



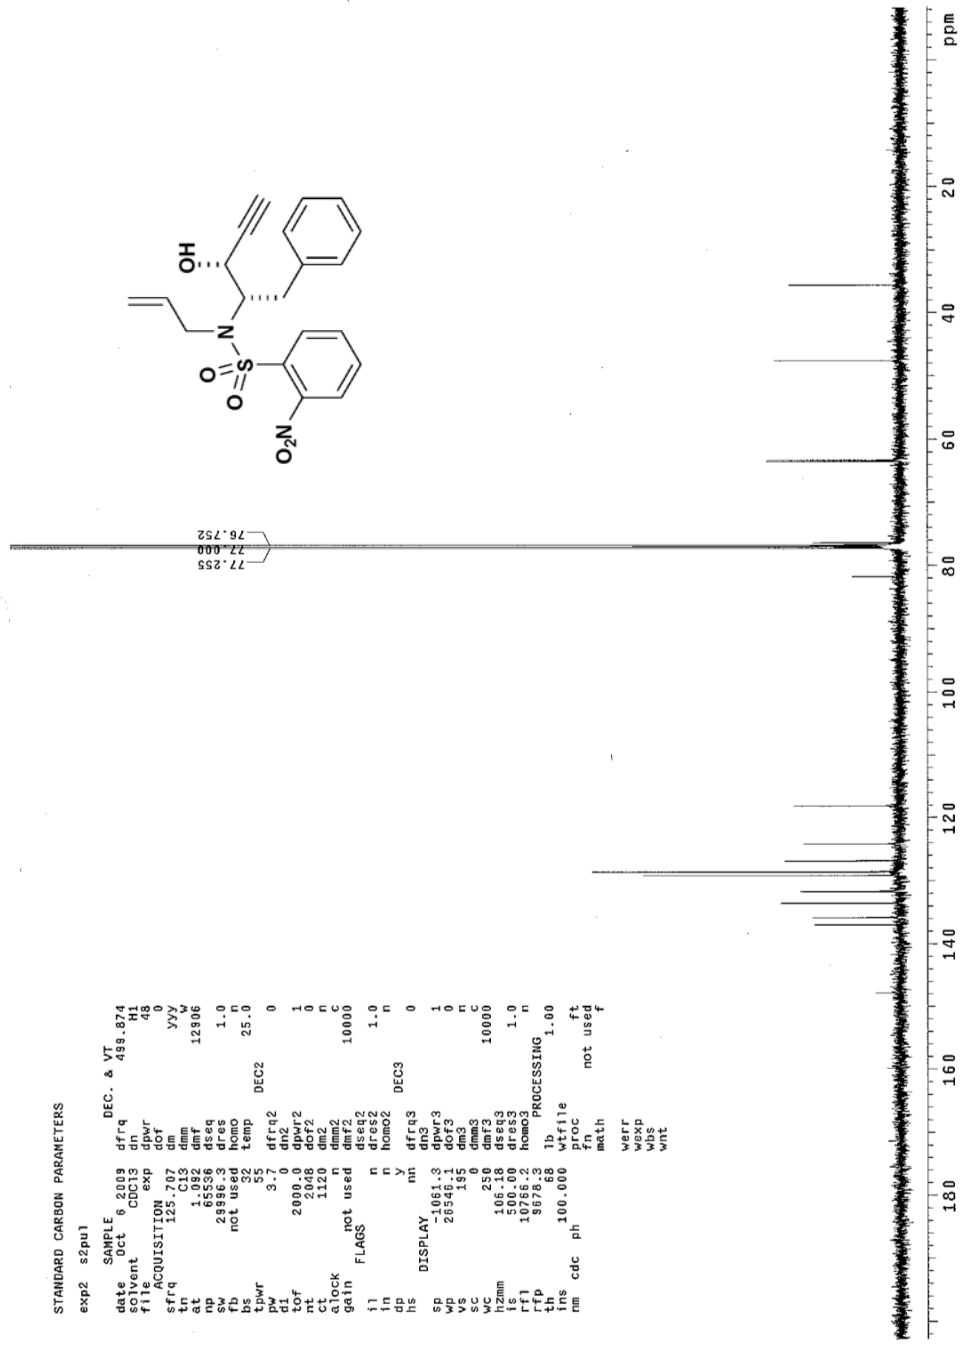

STANDARD CARBON PARAMETERS

exp2 s2pu1

date SAMPLE DEC. & VT  
 Oct 6.2003 dfrq 489.874  
 solvent CDCl3 dn 48  
 fl ACQUISITION exp dof 0  
 sfrq 125.707 dm yy 12896  
 tn 1 C13 dnm 12896  
 np 65536 dresq  
 sw 28986.3 dres 1.0  
 fb not used homo n  
 bs 52 temp 25.0  
 pwr 3.7  
 d1 3.7 dfrq2 0  
 d2 0 dn2 0  
 tof 2000.0 dpwr2 1  
 ct 1120 ds2 0  
 alock n dnm2 C  
 gain not used dmf2 10000  
 flags dse42 n  
 l n homo2 1.0  
 dp n y  
 hs DISPLAY mn dfrq3 0  
 sp 1051.3 dns 1  
 vs 26566.1 dfr3 0  
 vs 195 dm3 n  
 sc 0 dnm3 C  
 wc 1050 dmf3 10000  
 is 500.00 dres3 1.0  
 rfl 10766.2 homo3 n  
 rfp 9676.3 1b PROCESSING n  
 th 68 wfile 1.00  
 ms 100.000 proc ft  
 nm cdc ph fn not used f  
 math  
 werr  
 wexp  
 wbs  
 wnt

<sup>13</sup>C NMR (126 MHz, CDCl<sub>3</sub>) of compound 1d





Spectral data for (3*R*,4*R*)-4-(*N*-allyl-2-nitrophenylsulfonamido)-5-phenylpent-1-yn-3-yl acetate (**6b**)

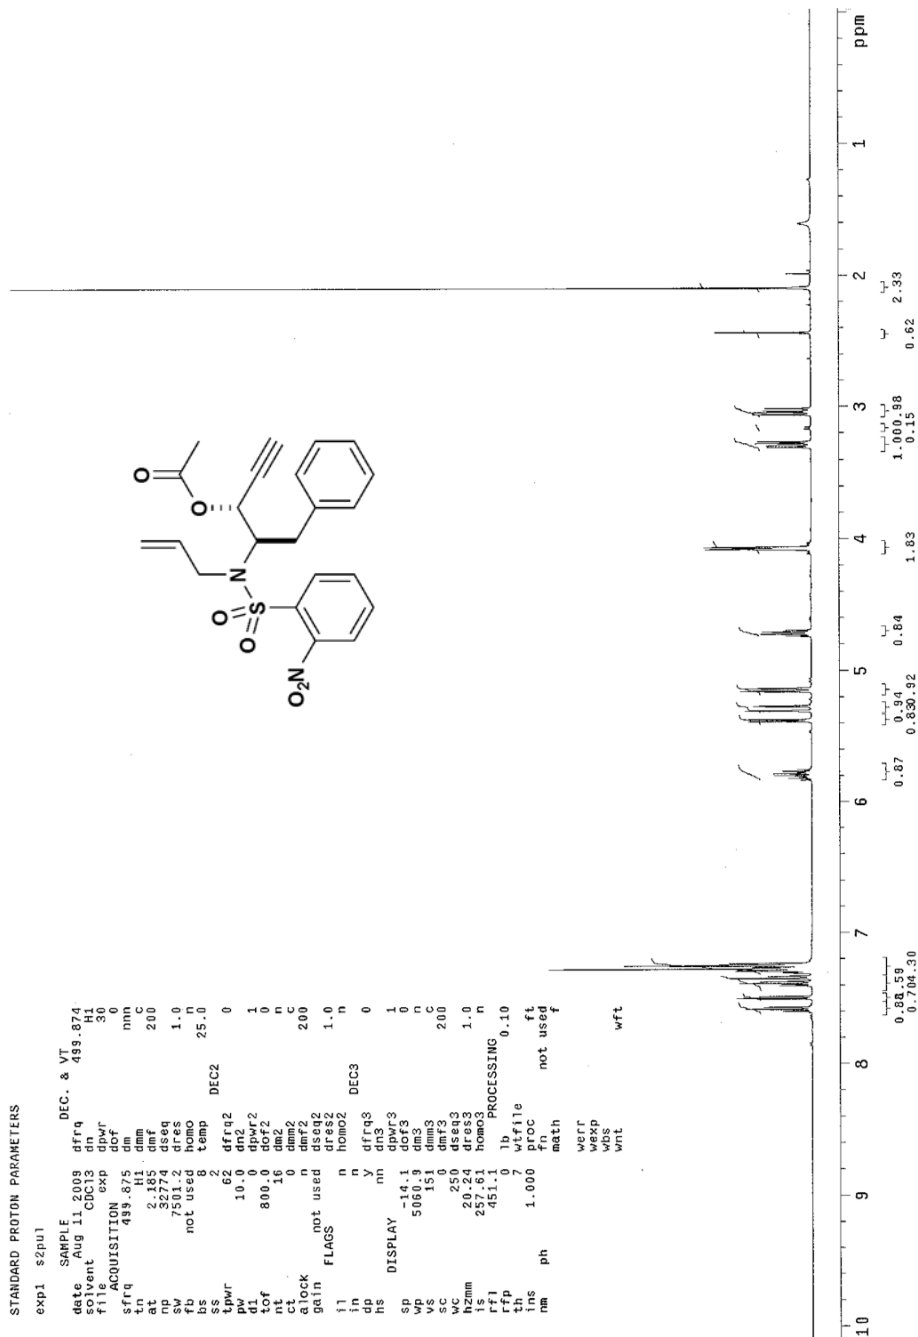

<sup>1</sup>H NMR (500 MHz, CDCl<sub>3</sub>) of compound **6b**

```

STANDARD CARBON PARAMETERS
exp1 s2pu1
date SAMPLE DEC. & VT
file Aug 11 2009 dfrq H1
solvent Aug 11 2009 dfrq H1
file exp dpwr 48
ACQUISITION exp dof 0
frfq 125.707 dnm yyv
at 1.092 dmf 12906
np 85536 dseq 1.0
sw 28936.3 dres 1.0
bs not used temp 25.0
tpwr 55 DEC2
pw 3.7 dfrq2 0
d1 2000.0 dnc 1
d2 2048 dof2 1
ct 0 dm2 0
alock n dnm2 n
gain not used dfr2 10000
flags n dres2 1.0
in n homo2 n
dp n y dfrq3 0
hs DISPLAY m dnc 0
sp -1039.3 dpwr3 1
wp 26476.5 dof3 0
vs 164 dms n
vc 250 dmf3 10000
h2mm 105.91 dseq3 1.0
is 500.00 dres3 1.0
rfi 10758.3 homo3 n
th 3876.8 lb PROCESSING 1.00
ins 100.000 wtfile
nm cdc ph in proc not used
math werr
wexp
wfs
wnl

```

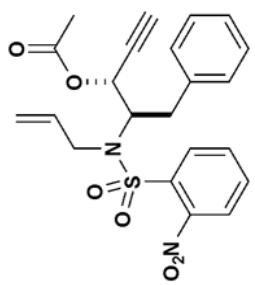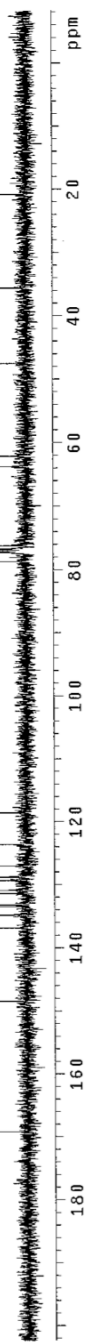

<sup>13</sup>C NMR (126 MHz, CDCl<sub>3</sub>) of compound **6b**

Spectral data for (2*R*,3*S*,*Z*)-2-benzyl-4-methylene-1-(2-nitrophenylsulfonyl)-2,3,4,7-tetrahydro-1*H*-azepin-3-ol (**5a**)

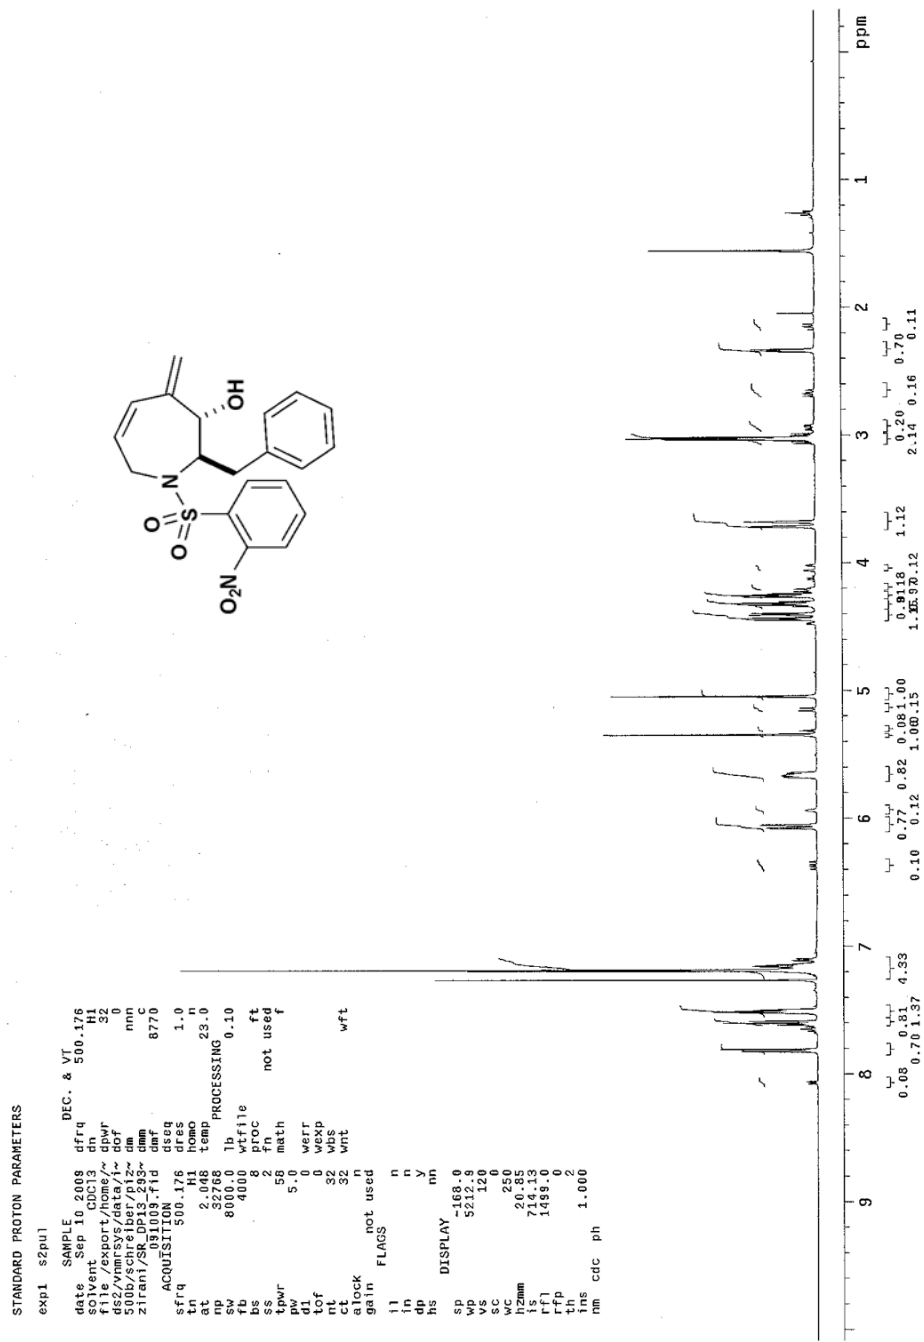

<sup>1</sup>H NMR (500 MHz, CDCl<sub>3</sub>) of compound **5a**

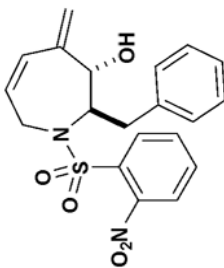

STANDARD CARBON PARAMETERS

```

exp2  s2bu1
SAMPLE Dec 15 2009 DEC. & VT
date Dec 15 2009 dfrq 489.874
solvent CDCl3 dn H1
flig CEC13 exp 49
acq CEC13 exp 49
sfrq 125.707 dm yy W
tn C13 dmm 12000
at 1.082 dmf
sp 2885.28 dseq
ps 1.00 pas
fb not used homo 1.0
bs 32 temp 25.0
tpwr 55
d1 4.6 dfrq2 0
d1 4.6 d1c
tof 2000.0 dpwr2 1
nt 5034 dotf2 0
ct 1248 dm2
check not used dm2
gain not used dm2 10000
fl FLAGS n dseq2 1.0
i1 n homo2 1.0
i2 n
i3 n
i4 n
i5 n
i6 n
i7 n
i8 n
i9 n
i10 n
i11 n
i12 n
i13 n
i14 n
i15 n
i16 n
i17 n
i18 n
i19 n
i20 n
i21 n
i22 n
i23 n
i24 n
i25 n
i26 n
i27 n
i28 n
i29 n
i30 n
i31 n
i32 n
i33 n
i34 n
i35 n
i36 n
i37 n
i38 n
i39 n
i40 n
i41 n
i42 n
i43 n
i44 n
i45 n
i46 n
i47 n
i48 n
i49 n
i50 n
i51 n
i52 n
i53 n
i54 n
i55 n
i56 n
i57 n
i58 n
i59 n
i60 n
i61 n
i62 n
i63 n
i64 n
i65 n
i66 n
i67 n
i68 n
i69 n
i70 n
i71 n
i72 n
i73 n
i74 n
i75 n
i76 n
i77 n
i78 n
i79 n
i80 n
i81 n
i82 n
i83 n
i84 n
i85 n
i86 n
i87 n
i88 n
i89 n
i90 n
i91 n
i92 n
i93 n
i94 n
i95 n
i96 n
i97 n
i98 n
i99 n
i100 n
i101 n
i102 n
i103 n
i104 n
i105 n
i106 n
i107 n
i108 n
i109 n
i110 n
i111 n
i112 n
i113 n
i114 n
i115 n
i116 n
i117 n
i118 n
i119 n
i120 n
i121 n
i122 n
i123 n
i124 n
i125 n
i126 n
i127 n
i128 n
i129 n
i130 n
i131 n
i132 n
i133 n
i134 n
i135 n
i136 n
i137 n
i138 n
i139 n
i140 n
i141 n
i142 n
i143 n
i144 n
i145 n
i146 n
i147 n
i148 n
i149 n
i150 n
i151 n
i152 n
i153 n
i154 n
i155 n
i156 n
i157 n
i158 n
i159 n
i160 n
i161 n
i162 n
i163 n
i164 n
i165 n
i166 n
i167 n
i168 n
i169 n
i170 n
i171 n
i172 n
i173 n
i174 n
i175 n
i176 n
i177 n
i178 n
i179 n
i180 n
i181 n
i182 n
i183 n
i184 n
i185 n
i186 n
i187 n
i188 n
i189 n
i190 n
i191 n
i192 n
i193 n
i194 n
i195 n
i196 n
i197 n
i198 n
i199 n
i200 n
i201 n
i202 n
i203 n
i204 n
i205 n
i206 n
i207 n
i208 n
i209 n
i210 n
i211 n
i212 n
i213 n
i214 n
i215 n
i216 n
i217 n
i218 n
i219 n
i220 n
i221 n
i222 n
i223 n
i224 n
i225 n
i226 n
i227 n
i228 n
i229 n
i230 n
i231 n
i232 n
i233 n
i234 n
i235 n
i236 n
i237 n
i238 n
i239 n
i240 n
i241 n
i242 n
i243 n
i244 n
i245 n
i246 n
i247 n
i248 n
i249 n
i250 n
i251 n
i252 n
i253 n
i254 n
i255 n
i256 n
i257 n
i258 n
i259 n
i260 n
i261 n
i262 n
i263 n
i264 n
i265 n
i266 n
i267 n
i268 n
i269 n
i270 n
i271 n
i272 n
i273 n
i274 n
i275 n
i276 n
i277 n
i278 n
i279 n
i280 n
i281 n
i282 n
i283 n
i284 n
i285 n
i286 n
i287 n
i288 n
i289 n
i290 n
i291 n
i292 n
i293 n
i294 n
i295 n
i296 n
i297 n
i298 n
i299 n
i300 n
i301 n
i302 n
i303 n
i304 n
i305 n
i306 n
i307 n
i308 n
i309 n
i310 n
i311 n
i312 n
i313 n
i314 n
i315 n
i316 n
i317 n
i318 n
i319 n
i320 n
i321 n
i322 n
i323 n
i324 n
i325 n
i326 n
i327 n
i328 n
i329 n
i330 n
i331 n
i332 n
i333 n
i334 n
i335 n
i336 n
i337 n
i338 n
i339 n
i340 n
i341 n
i342 n
i343 n
i344 n
i345 n
i346 n
i347 n
i348 n
i349 n
i350 n
i351 n
i352 n
i353 n
i354 n
i355 n
i356 n
i357 n
i358 n
i359 n
i360 n
i361 n
i362 n
i363 n
i364 n
i365 n
i366 n
i367 n
i368 n
i369 n
i370 n
i371 n
i372 n
i373 n
i374 n
i375 n
i376 n
i377 n
i378 n
i379 n
i380 n
i381 n
i382 n
i383 n
i384 n
i385 n
i386 n
i387 n
i388 n
i389 n
i390 n
i391 n
i392 n
i393 n
i394 n
i395 n
i396 n
i397 n
i398 n
i399 n
i400 n
i401 n
i402 n
i403 n
i404 n
i405 n
i406 n
i407 n
i408 n
i409 n
i410 n
i411 n
i412 n
i413 n
i414 n
i415 n
i416 n
i417 n
i418 n
i419 n
i420 n
i421 n
i422 n
i423 n
i424 n
i425 n
i426 n
i427 n
i428 n
i429 n
i430 n
i431 n
i432 n
i433 n
i434 n
i435 n
i436 n
i437 n
i438 n
i439 n
i440 n
i441 n
i442 n
i443 n
i444 n
i445 n
i446 n
i447 n
i448 n
i449 n
i450 n
i451 n
i452 n
i453 n
i454 n
i455 n
i456 n
i457 n
i458 n
i459 n
i460 n
i461 n
i462 n
i463 n
i464 n
i465 n
i466 n
i467 n
i468 n
i469 n
i470 n
i471 n
i472 n
i473 n
i474 n
i475 n
i476 n
i477 n
i478 n
i479 n
i480 n
i481 n
i482 n
i483 n
i484 n
i485 n
i486 n
i487 n
i488 n
i489 n
i490 n
i491 n
i492 n
i493 n
i494 n
i495 n
i496 n
i497 n
i498 n
i499 n
i500 n
i501 n
i502 n
i503 n
i504 n
i505 n
i506 n
i507 n
i508 n
i509 n
i510 n
i511 n
i512 n
i513 n
i514 n
i515 n
i516 n
i517 n
i518 n
i519 n
i520 n
i521 n
i522 n
i523 n
i524 n
i525 n
i526 n
i527 n
i528 n
i529 n
i530 n
i531 n
i532 n
i533 n
i534 n
i535 n
i536 n
i537 n
i538 n
i539 n
i540 n
i541 n
i542 n
i543 n
i544 n
i545 n
i546 n
i547 n
i548 n
i549 n
i550 n
i551 n
i552 n
i553 n
i554 n
i555 n
i556 n
i557 n
i558 n
i559 n
i560 n
i561 n
i562 n
i563 n
i564 n
i565 n
i566 n
i567 n
i568 n
i569 n
i570 n
i571 n
i572 n
i573 n
i574 n
i575 n
i576 n
i577 n
i578 n
i579 n
i580 n
i581 n
i582 n
i583 n
i584 n
i585 n
i586 n
i587 n
i588 n
i589 n
i590 n
i591 n
i592 n
i593 n
i594 n
i595 n
i596 n
i597 n
i598 n
i599 n
i600 n
i601 n
i602 n
i603 n
i604 n
i605 n
i606 n
i607 n
i608 n
i609 n
i610 n
i611 n
i612 n
i613 n
i614 n
i615 n
i616 n
i617 n
i618 n
i619 n
i620 n
i621 n
i622 n
i623 n
i624 n
i625 n
i626 n
i627 n
i628 n
i629 n
i630 n
i631 n
i632 n
i633 n
i634 n
i635 n
i636 n
i637 n
i638 n
i639 n
i640 n
i641 n
i642 n
i643 n
i644 n
i645 n
i646 n
i647 n
i648 n
i649 n
i650 n
i651 n
i652 n
i653 n
i654 n
i655 n
i656 n
i657 n
i658 n
i659 n
i660 n
i661 n
i662 n
i663 n
i664 n
i665 n
i666 n
i667 n
i668 n
i669 n
i670 n
i671 n
i672 n
i673 n
i674 n
i675 n
i676 n
i677 n
i678 n
i679 n
i680 n
i681 n
i682 n
i683 n
i684 n
i685 n
i686 n
i687 n
i688 n
i689 n
i690 n
i691 n
i692 n
i693 n
i694 n
i695 n
i696 n
i697 n
i698 n
i699 n
i700 n
i701 n
i702 n
i703 n
i704 n
i705 n
i706 n
i707 n
i708 n
i709 n
i710 n
i711 n
i712 n
i713 n
i714 n
i715 n
i716 n
i717 n
i718 n
i719 n
i720 n
i721 n
i722 n
i723 n
i724 n
i725 n
i726 n
i727 n
i728 n
i729 n
i730 n
i731 n
i732 n
i733 n
i734 n
i735 n
i736 n
i737 n
i738 n
i739 n
i740 n
i741 n
i742 n
i743 n
i744 n
i745 n
i746 n
i747 n
i748 n
i749 n
i750 n
i751 n
i752 n
i753 n
i754 n
i755 n
i756 n
i757 n
i758 n
i759 n
i760 n
i761 n
i762 n
i763 n
i764 n
i765 n
i766 n
i767 n
i768 n
i769 n
i770 n
i771 n
i772 n
i773 n
i774 n
i775 n
i776 n
i777 n
i778 n
i779 n
i780 n
i781 n
i782 n
i783 n
i784 n
i785 n
i786 n
i787 n
i788 n
i789 n
i790 n
i791 n
i792 n
i793 n
i794 n
i795 n
i796 n
i797 n
i798 n
i799 n
i800 n
i801 n
i802 n
i803 n
i804 n
i805 n
i806 n
i807 n
i808 n
i809 n
i810 n
i811 n
i812 n
i813 n
i814 n
i815 n
i816 n
i817 n
i818 n
i819 n
i820 n
i821 n
i822 n
i823 n
i824 n
i825 n
i826 n
i827 n
i828 n
i829 n
i830 n
i831 n
i832 n
i833 n
i834 n
i835 n
i836 n
i837 n
i838 n
i839 n
i840 n
i841 n
i842 n
i843 n
i844 n
i845 n
i846 n
i847 n
i848 n
i849 n
i850 n
i851 n
i852 n
i853 n
i854 n
i855 n
i856 n
i857 n
i858 n
i859 n
i860 n
i861 n
i862 n
i863 n
i864 n
i865 n
i866 n
i867 n
i868 n
i869 n
i870 n
i871 n
i872 n
i873 n
i874 n
i875 n
i876 n
i877 n
i878 n
i879 n
i880 n
i881 n
i882 n
i883 n
i884 n
i885 n
i886 n
i887 n
i888 n
i889 n
i890 n
i891 n
i892 n
i893 n
i894 n
i895 n
i896 n
i897 n
i898 n
i899 n
i900 n
i901 n
i902 n
i903 n
i904 n
i905 n
i906 n
i907 n
i908 n
i909 n
i910 n
i911 n
i912 n
i913 n
i914 n
i915 n
i916 n
i917 n
i918 n
i919 n
i920 n
i921 n
i922 n
i923 n
i924 n
i925 n
i926 n
i927 n
i928 n
i929 n
i930 n
i931 n
i932 n
i933 n
i934 n
i935 n
i936 n
i937 n
i938 n
i939 n
i940 n
i941 n
i942 n
i943 n
i944 n
i945 n
i946 n
i947 n
i948 n
i949 n
i950 n
i951 n
i952 n
i953 n
i954 n
i955 n
i956 n
i957 n
i958 n
i959 n
i960 n
i961 n
i962 n
i963 n
i964 n
i965 n
i966 n
i967 n
i968 n
i969 n
i970 n
i971 n
i972 n
i973 n
i974 n
i975 n
i976 n
i977 n
i978 n
i979 n
i980 n
i981 n
i982 n
i983 n
i984 n
i985 n
i986 n
i987 n
i988 n
i989 n
i990 n
i991 n
i992 n
i993 n
i994 n
i995 n
i996 n
i997 n
i998 n
i999 n
i1000 n

```

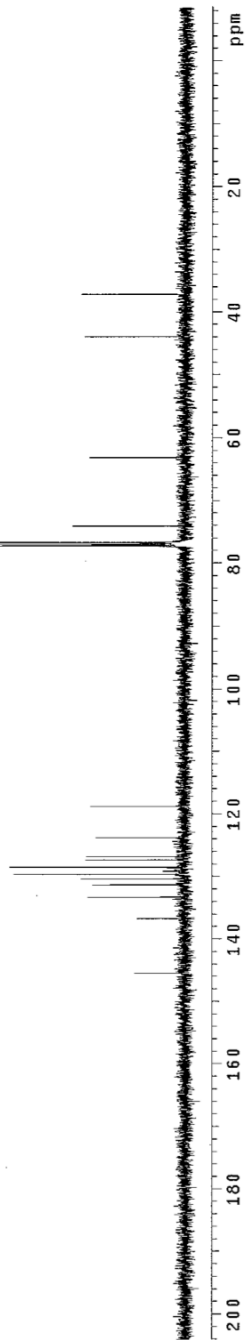

<sup>13</sup>C NMR (126 MHz, CDCl<sub>3</sub>) of compound **5a**

Spectral data for (2*R*,3*S*)-2-benzyl-1-(2-nitrophenylsulfonyl)-4-vinyl-1,2,3,6-tetrahydropyridin-3-yl-acetate (**7a**)

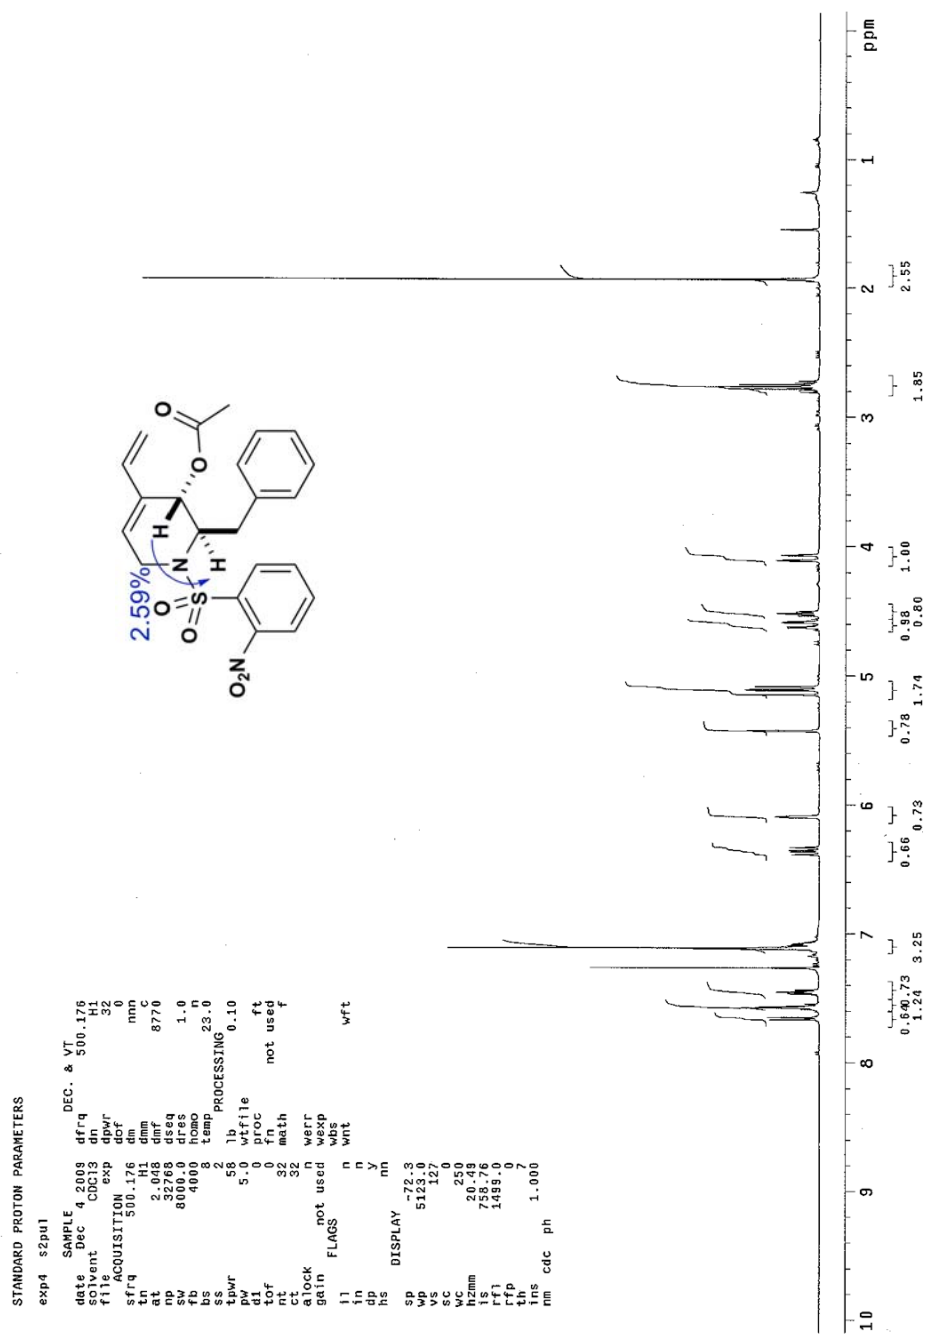

<sup>1</sup>H NMR (500 MHz, CDCl<sub>3</sub>) of compound **7a**



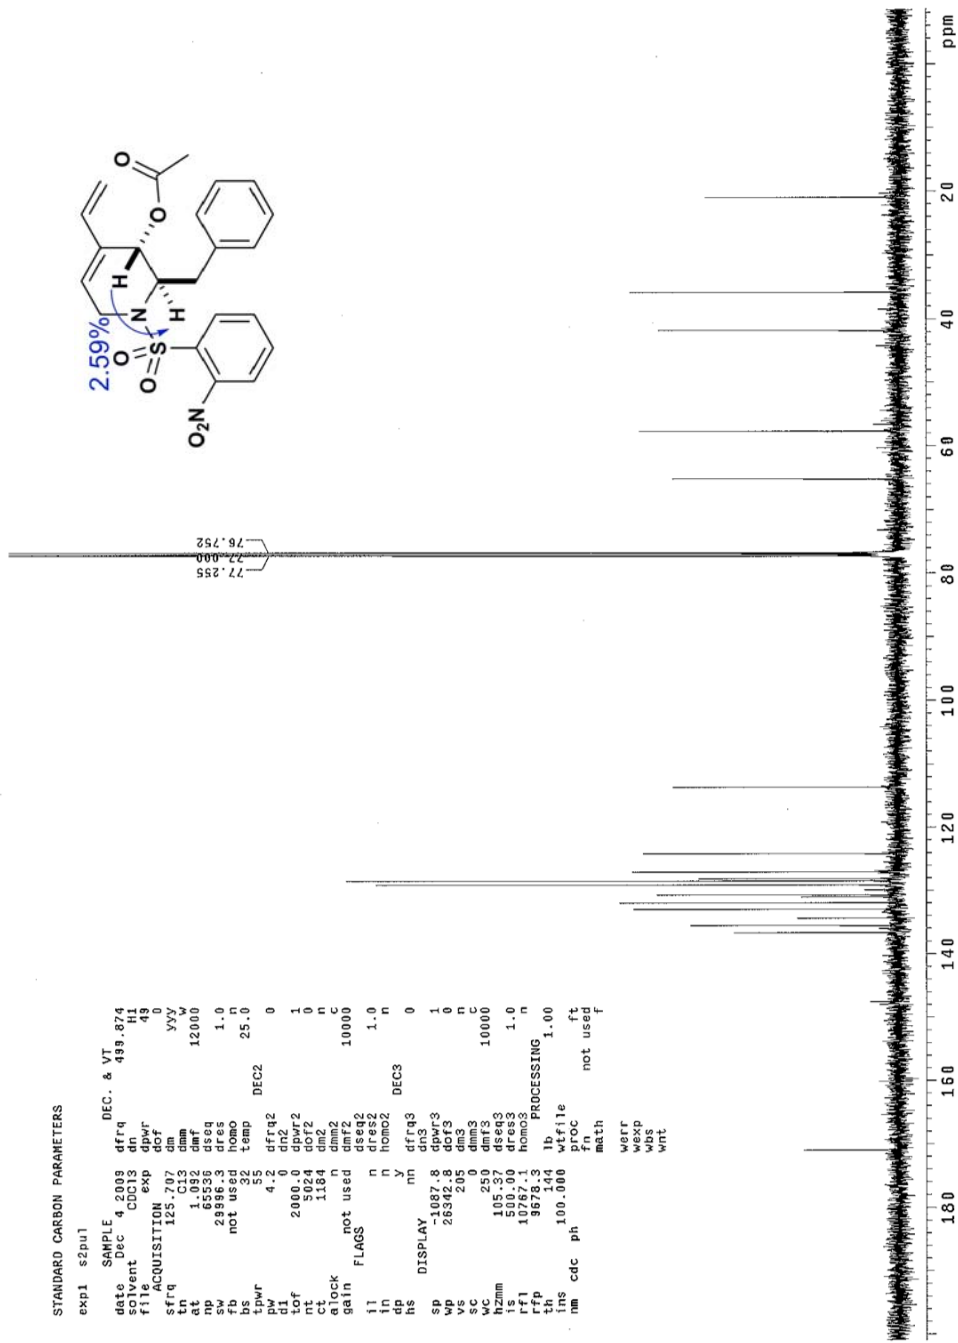

$^{13}\text{C}$  NMR (126 MHz,  $\text{CDCl}_3$ ) of compound **7a**

Spectral data for (2*R*,3*R*)-2-benzyl-1-(2-nitrophenylsulfonyl)-4-vinyl-1,2,3,6-tetrahydropyridin-3-yl-acetate (**7b**)

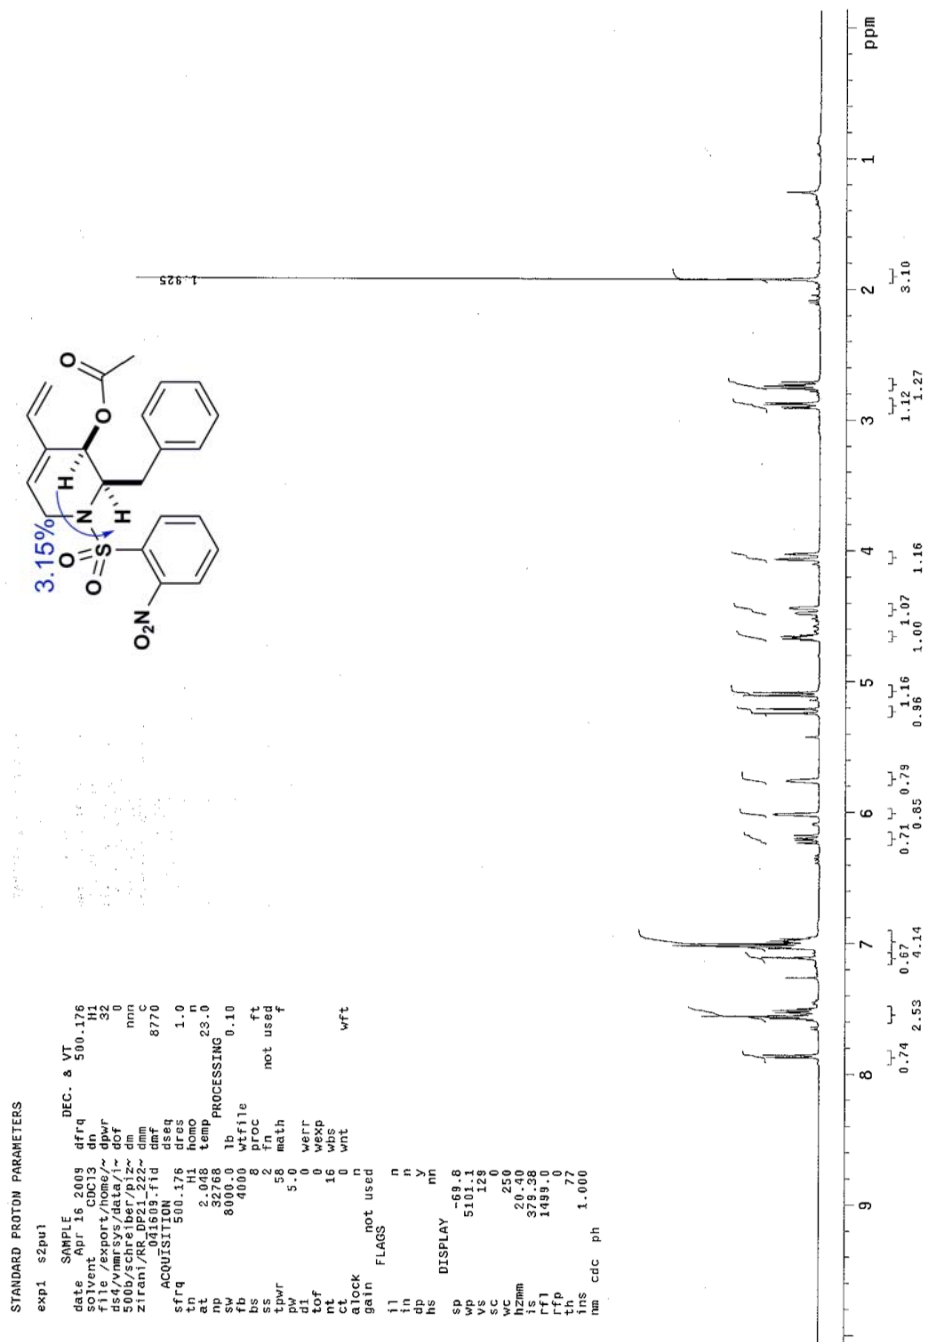

<sup>1</sup>H NMR (500 MHz, CDCl<sub>3</sub>) of compound **7b**

STANDARD CARBON PARAMETERS

```

exp1 s2pu1
SAMPLE DEC. & VT
date Dec 6 2009 dfrq 499.874
solvent CDCl3 dn 4
rf ACQUISITION exp dcr 45
sfrq 125.707 dm vvy 12000 W
at 1.013 dmm 12000 W
sw 65392 dres 1.0
fb not used homo 29996.3 dres 1.0
bs not used temp 32 temp 25.0
tpwr 4.2 dfrq2 0
d1 0 dn2 0
tof 2000.0 dpwr2 1
nt 5040 dpf2 0
atlock 84 dn3 0
gain not used dm2 C
gain 10000 dmf2 10000
flags dseq2 1.0
i1 n dres2 1.0
dn y homo2 DECS 0
hs DISPLAY nn dfrq3 0
sp -8064.9 dn3 1
ve 28358.4 dpwr3 0
vc 94 dn3 n
sc 0 dmm3 C
wc 250 dmf3 10000
l2mm 500.00 dres 1.0
rfi 10768.9 homo3 n
rfp 9678.3 lb PROCESSING n
th ns 1.00
nm cdc ph 100.000 proc ft
fn not used f
meth
werr
wexp
wps
wnt
  
```

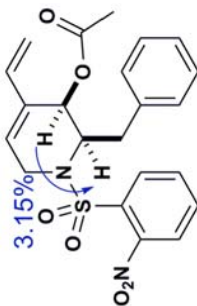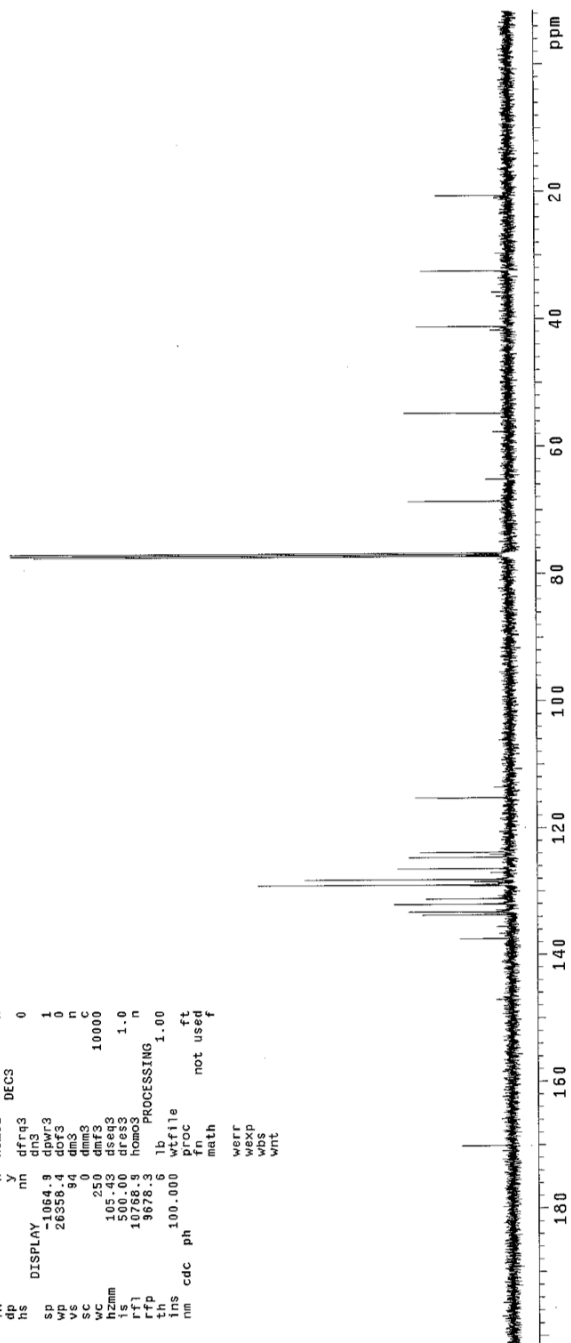

$^{13}\text{C}$  NMR (126 MHz,  $\text{CDCl}_3$ ) of compound **7b**

Spectral data for (2*R*,3*S*)-2-benzyl-1-(2-nitrophenylsulfonyl)-4-vinyl-1,2,3,6-tetrahydropyridin-3-ol (**8a**)

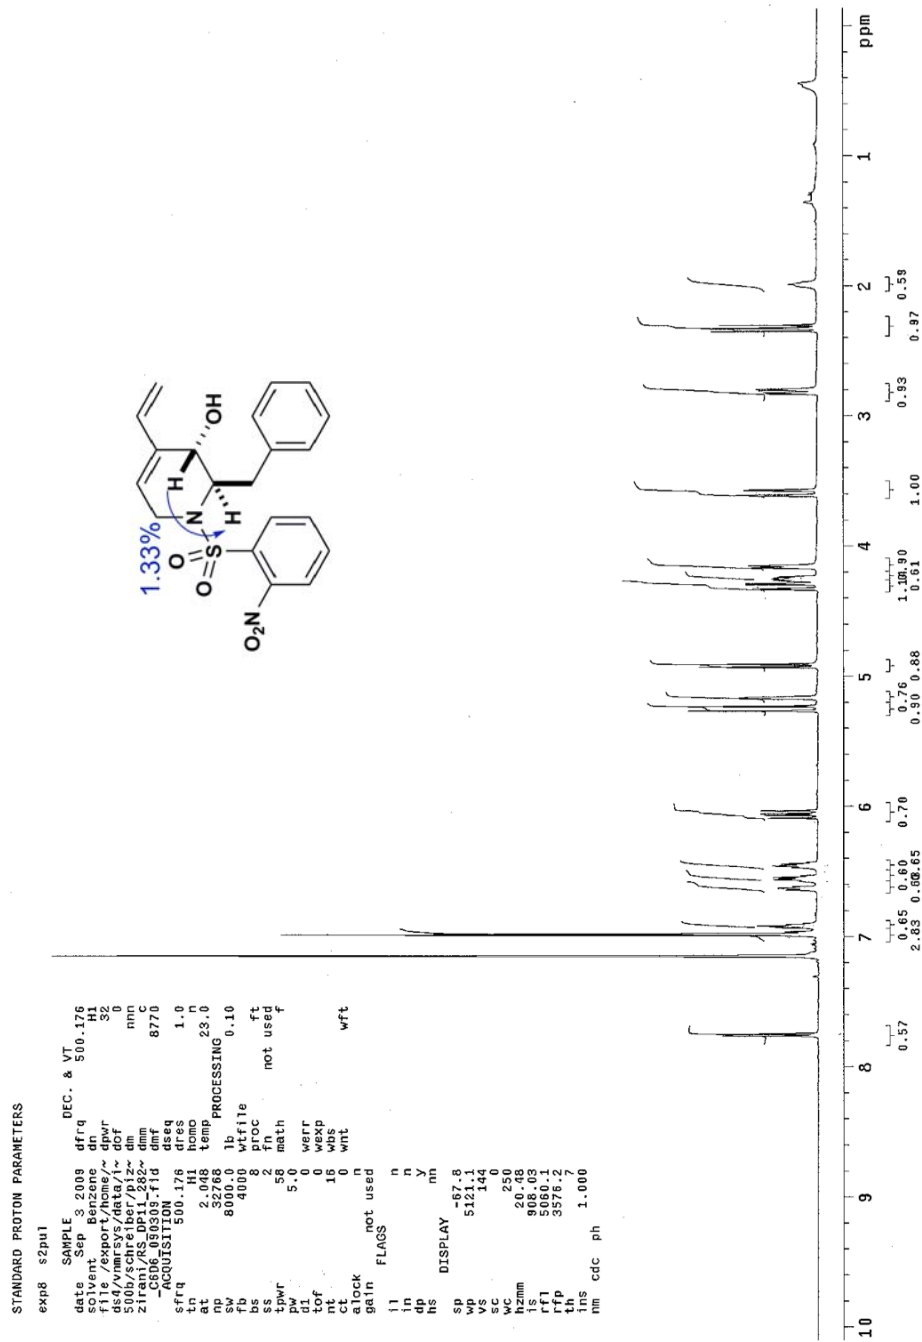

<sup>1</sup>H NMR (500 MHz, Benzene) of compound **8a**

STANDARD CARBON PARAMETERS

```

exp1 s2pu1
SAMPLE 1 2009 dfrc DEC. & VT
date Sep dnc 499.874
solvent CDC13 dn 48
fl ACQUISITION exp dpwr 48
at C13 dnm 123.707
tn C13 dnm 123.707
at 1.032 dmf 12306
pw 29886.3 dseq 1.0
fb not used homo 1.0
bs 32 temp 25.0
tpwr 55 dfrc2 DEC2
dl 3.0 dr2 0
tcf 2000.0 dpwr2 1
nt 2048 dcf2 0
clock 0 dm2 n
gain not used dmf2 10000
FLAGS n dseq2
f1 n dres2 1.0
f2 n homo2 n
f3 n homo3 DEC3
f4 n homo4 n
f5 n homo5 n
f6 n homo6 n
f7 n homo7 n
f8 n homo8 n
f9 n homo9 n
f10 n homo10 n
f11 n homo11 n
f12 n homo12 n
f13 n homo13 n
f14 n homo14 n
f15 n homo15 n
f16 n homo16 n
f17 n homo17 n
f18 n homo18 n
f19 n homo19 n
f20 n homo20 n
f21 n homo21 n
f22 n homo22 n
f23 n homo23 n
f24 n homo24 n
f25 n homo25 n
f26 n homo26 n
f27 n homo27 n
f28 n homo28 n
f29 n homo29 n
f30 n homo30 n
f31 n homo31 n
f32 n homo32 n
f33 n homo33 n
f34 n homo34 n
f35 n homo35 n
f36 n homo36 n
f37 n homo37 n
f38 n homo38 n
f39 n homo39 n
f40 n homo40 n
f41 n homo41 n
f42 n homo42 n
f43 n homo43 n
f44 n homo44 n
f45 n homo45 n
f46 n homo46 n
f47 n homo47 n
f48 n homo48 n
f49 n homo49 n
f50 n homo50 n
f51 n homo51 n
f52 n homo52 n
f53 n homo53 n
f54 n homo54 n
f55 n homo55 n
f56 n homo56 n
f57 n homo57 n
f58 n homo58 n
f59 n homo59 n
f60 n homo60 n
f61 n homo61 n
f62 n homo62 n
f63 n homo63 n
f64 n homo64 n
f65 n homo65 n
f66 n homo66 n
f67 n homo67 n
f68 n homo68 n
f69 n homo69 n
f70 n homo70 n
f71 n homo71 n
f72 n homo72 n
f73 n homo73 n
f74 n homo74 n
f75 n homo75 n
f76 n homo76 n
f77 n homo77 n
f78 n homo78 n
f79 n homo79 n
f80 n homo80 n
f81 n homo81 n
f82 n homo82 n
f83 n homo83 n
f84 n homo84 n
f85 n homo85 n
f86 n homo86 n
f87 n homo87 n
f88 n homo88 n
f89 n homo89 n
f90 n homo90 n
f91 n homo91 n
f92 n homo92 n
f93 n homo93 n
f94 n homo94 n
f95 n homo95 n
f96 n homo96 n
f97 n homo97 n
f98 n homo98 n
f99 n homo99 n
f100 n homo100 n

```

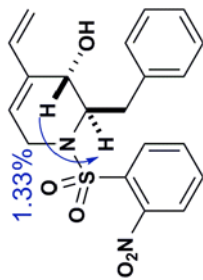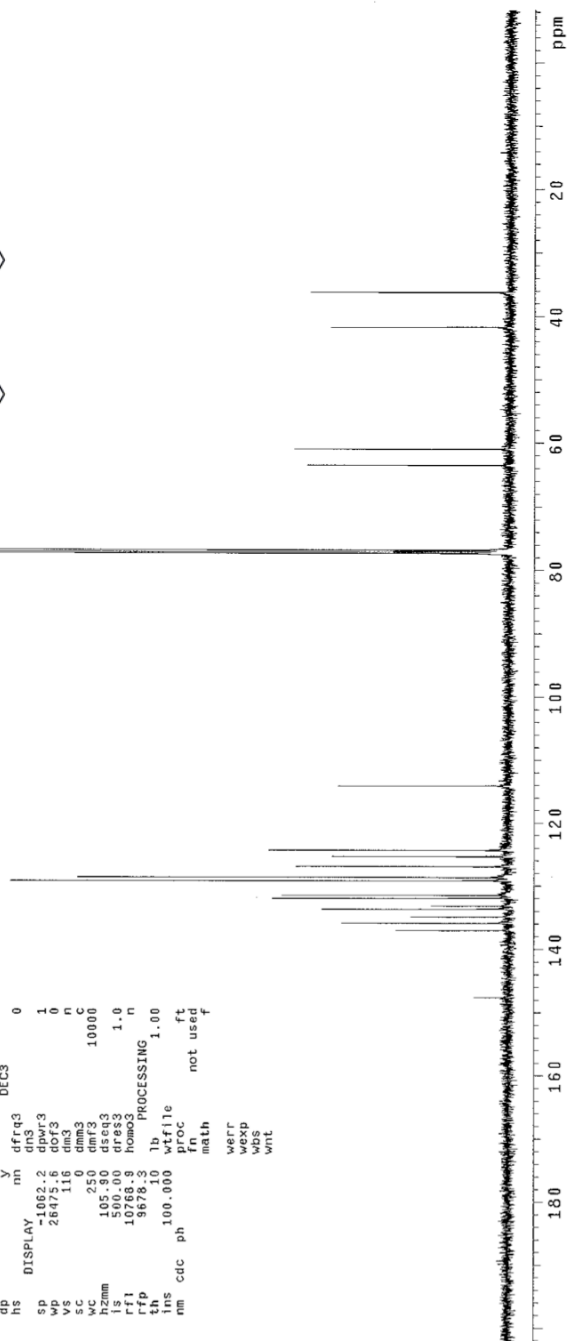

<sup>13</sup>C NMR (126 MHz, CDCl<sub>3</sub>) of compound **8a**

Spectral data for (2*R*,3*R*)-2-benzyl-1-(2-nitrophenylsulfonyl)-4-vinyl-1,2,3,6-tetrahydropyridin-3-ol (**8b**)

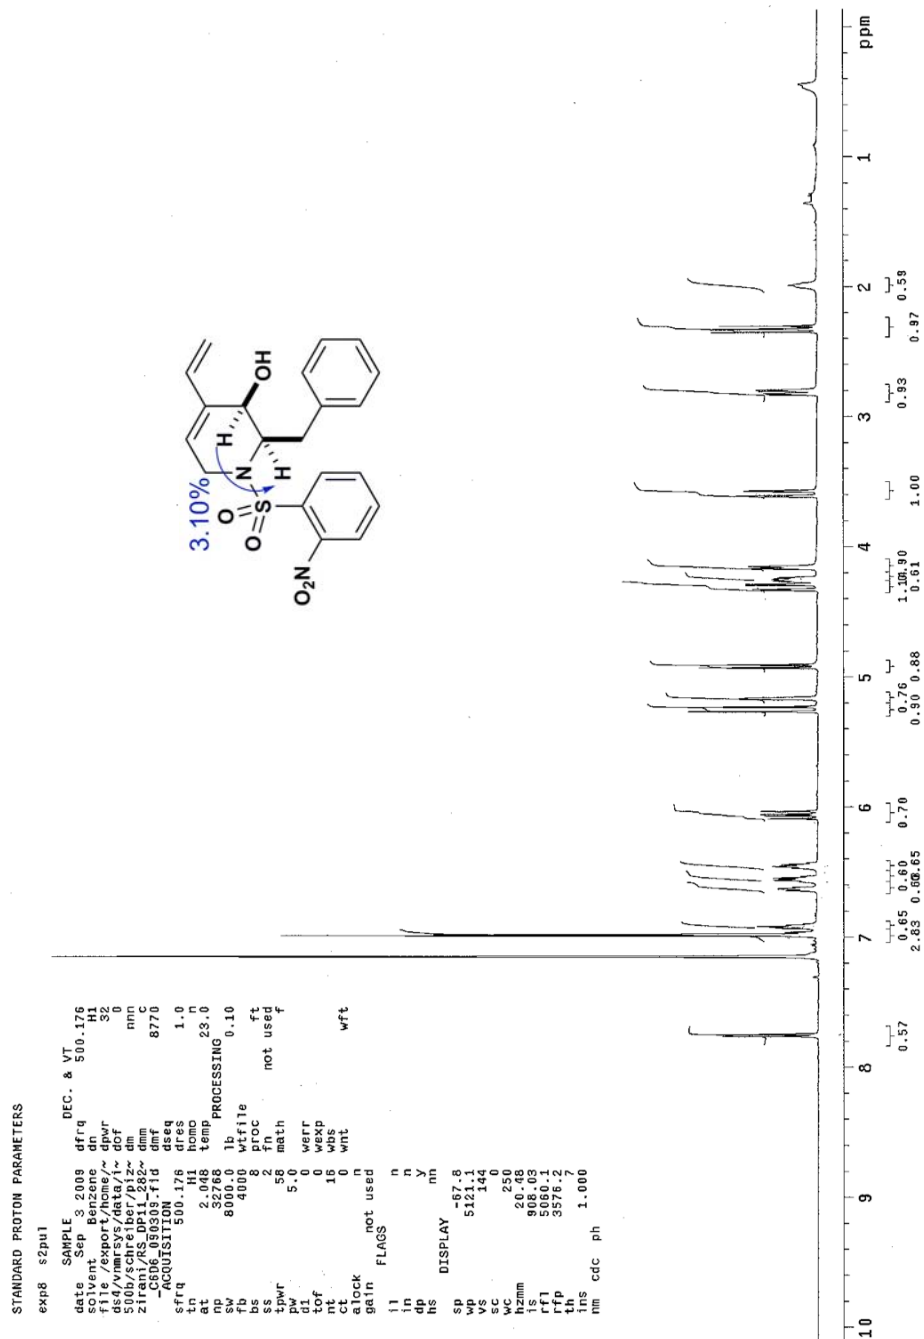

<sup>1</sup>H NMR (500 MHz, Benzene) of compound **8b**

STANDARD CARBON PARAMETERS

```

exp1 s2pu1
SAMPLE
date Sep 1 2008 DEC. & VT
solvent CDCl3 d1 499.874
file ACQUISITION exp d1vr 48
f1 125.767 dm vvy
at 1.042 dmf 12908
np 65536 dseq
sw 29386.3 dres 1.0
lg not used homo n
lp 35 temp 25.0
pwr 3.7 dfrq2 0
dl 0 dnt 0
df 2000.0 dprf2 1
nt 2048 dnt2 0
ct 0 dnt3 0
alock n dnm2 C
gain not used dnt2 10000
flags dseq dres2
l1 n homo2 1.0
in n y
dp n DEC3
hs DISPLAY nm dfrq3 0
sp -1062.2 dprf3 1
wp 28475.6 ddf3 0
vs 116 dms3 n
sc 0 dms3 C
hzmm 250 dms3 10000
ls 105.30 dseq3
l1 500.00 dres3 1.0
rf1 10769.3 homo3 n
tpp 3676.10 lb PROCESSING n
ins 100.000 wtfile 1.00
nm cdc ph proc ft
math not used f
weff
wexp
wbs
wnt

```

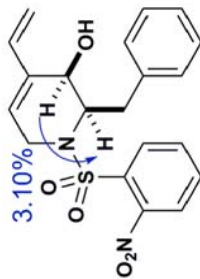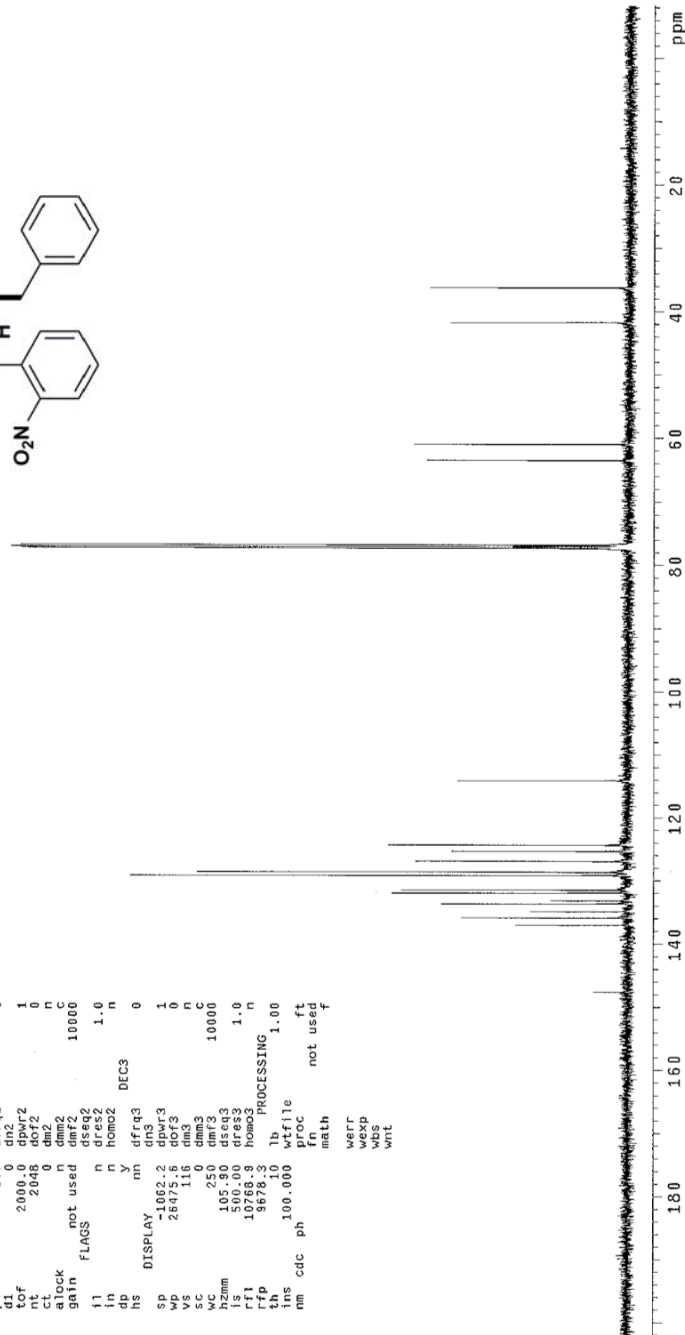

$^{13}\text{C}$  NMR (126 MHz,  $\text{CDCl}_3$ ) of compound **8b**

Spectral data for (3*R*,4*S*,7*aS*)-3-benzyl-2-(2-nitrophenylsulfonyl)-6-oxo-2,3,4,6,7,7*a*-hexahydro-1*H*-cyclopenta [c]pyridin-4-yl acetate (**9a**)

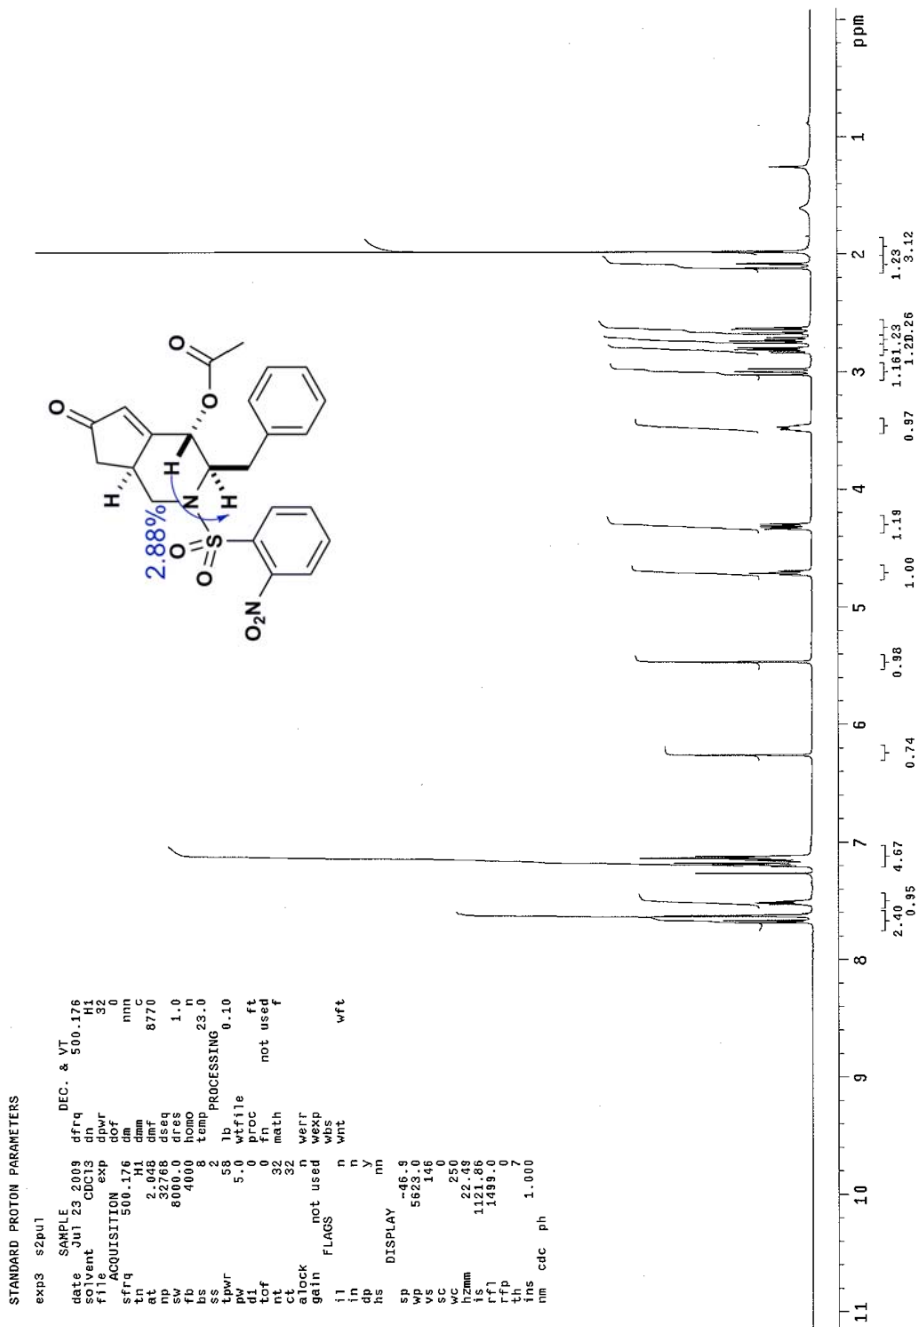

<sup>1</sup>H NMR (500 MHz, CDCl<sub>3</sub>) of compound **9a**



STANDARD CARBON PARAMETERS

```

exp1 s2put
SAMPLE
date Jul 23 2009 DEC. & VT
file CDC13 d1 493.874
solvent exp H1
file dpwr 48
ACQUISITION exp dof 0
sfreq 125.713 dmh yy
in 123.713 dmh 12905
at 1.082 dmf
np 65536 ds0q 1.0
sw 29996.3 dres
bs not us32 temp 25.0
tpwr 55 DEC2
pw 3.7 dfrq2 0
td 0 dmwr2 1
nt 2000.0 dofr2 0
ct 2048 dof2 0
atlock n dnm2
gain not used ds02 10000
FLAGS n homo2 1.0
il n y dfrq3 0
dp n y dfrq3 0
hs DISPLAY dm3
SP -1088.7 dpvr3 1
wp 29080.8 dofs 0
vs 143 dm3 C
vc 250 dmf3 10000
hzmm 116.32 dseq3
ls 500.00 dres3 1.0
rf1 18978.0 homo3
rfp 3678.3 lb PROCESSING n
ins 100.000 wf1file 1.00
nm cdc ph proc not used
math
werr
wexp
wof
wnt

```

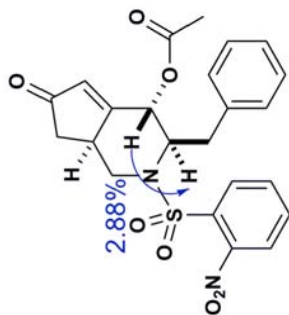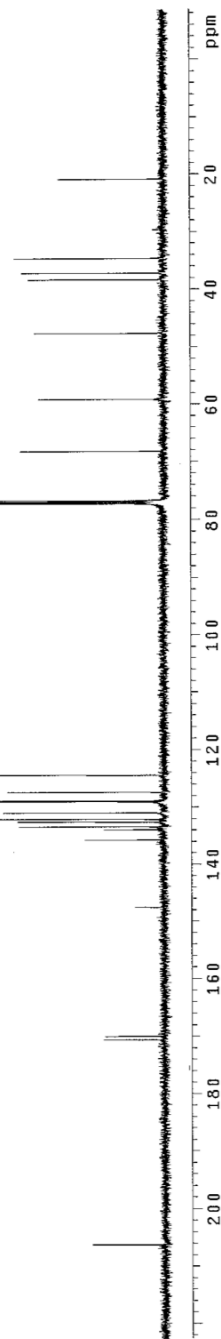

$^{13}\text{C}$  NMR (126 MHz,  $\text{CDCl}_3$ ) of compound **9a**

Spectral data for (3*R*,4*R*,7*aS*)-3-benzyl-2-(2-nitrophenylsulfonyl)-6-oxo-2,3,4,6,7,7*a*-hexahydro-1*H*-cyclopenta [c]pyridin-4-yl acetate (**9b**)

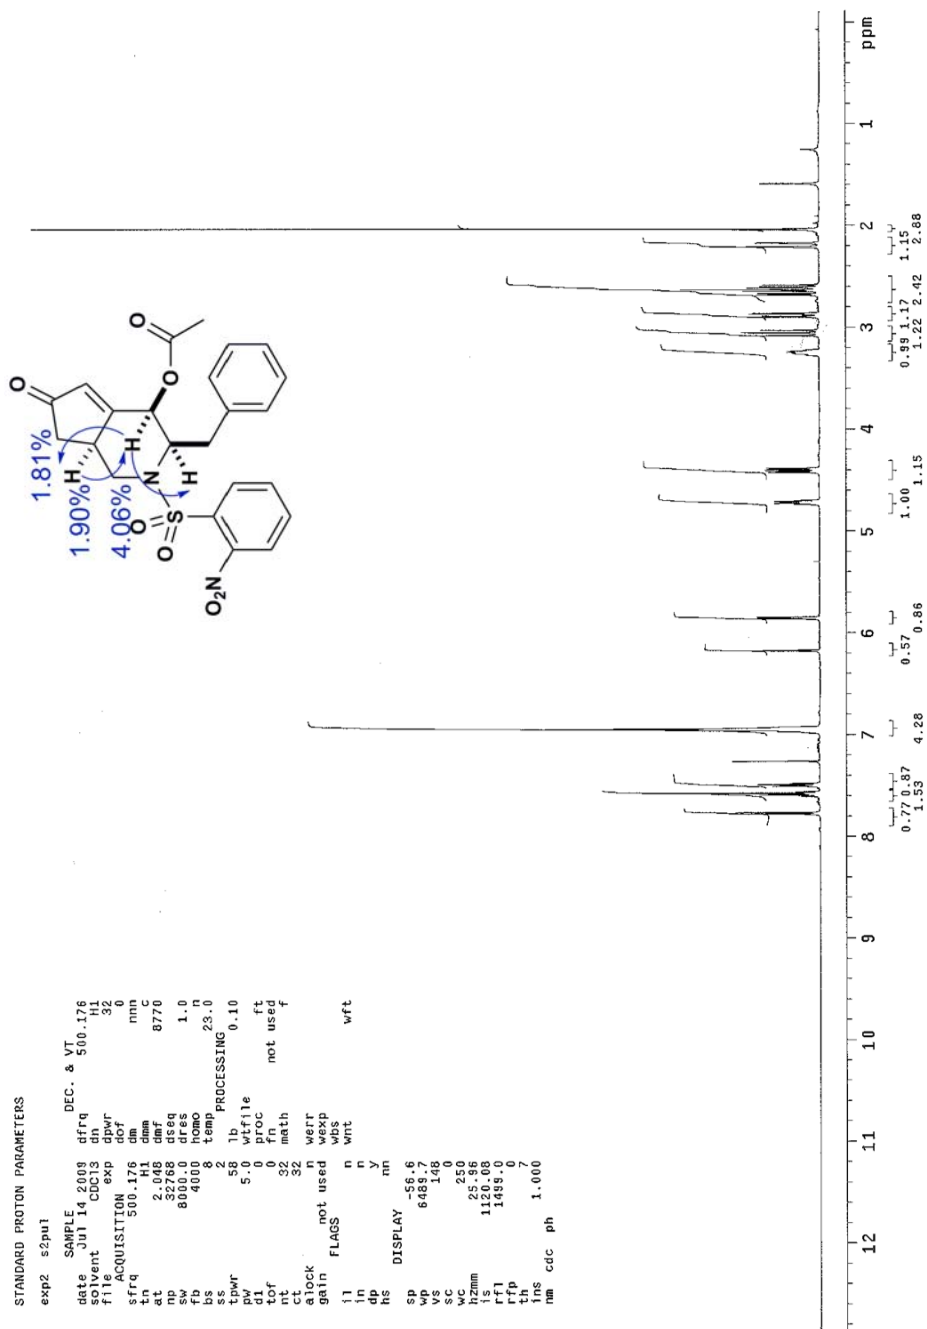

<sup>1</sup>H NMR (500 MHz, CDCl<sub>3</sub>) of compound **9b**

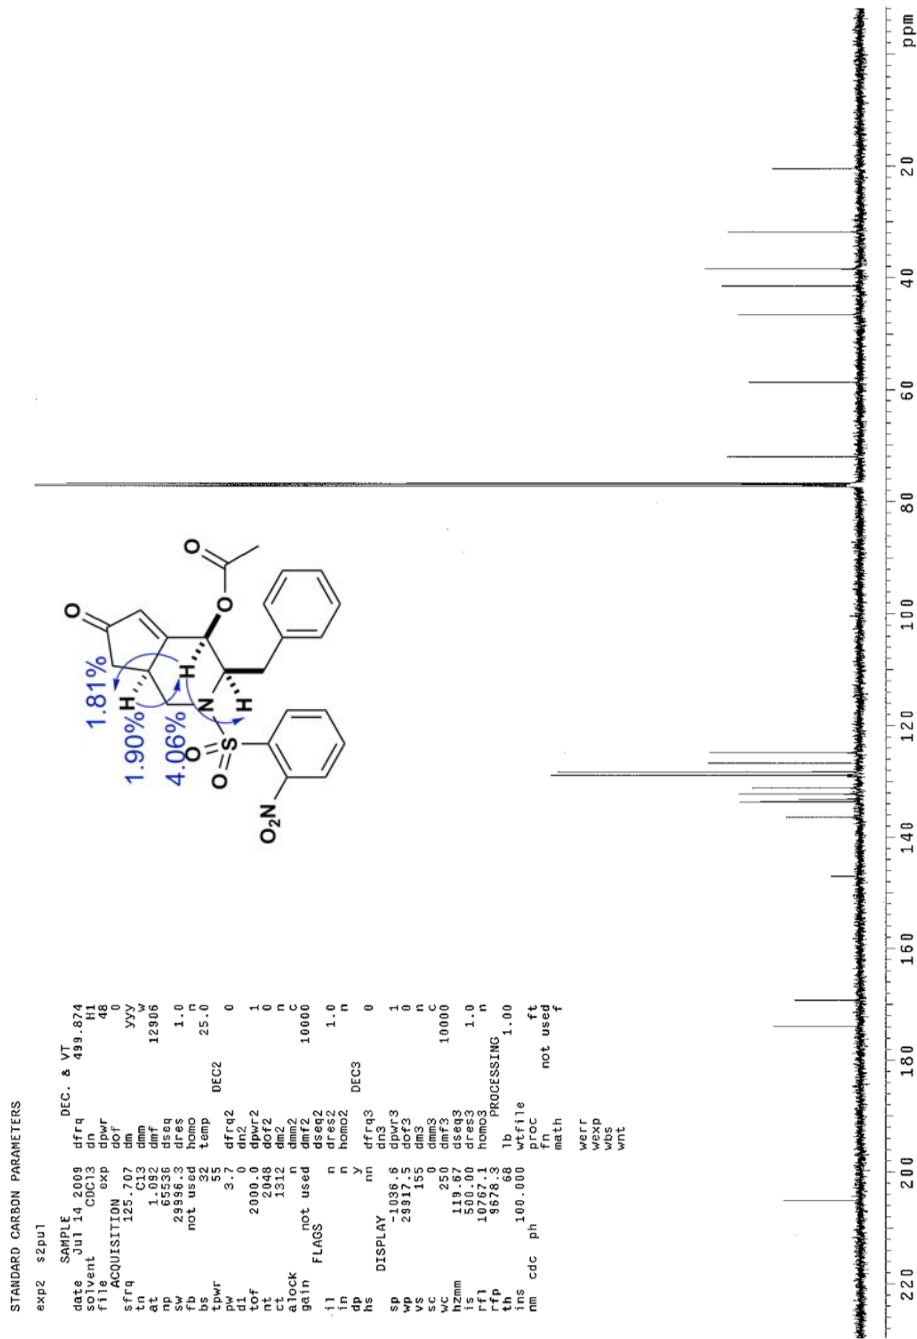

$^{13}\text{C}$  NMR (126 MHz,  $\text{CDCl}_3$ ) of compound **9b**

Spectral data for (2*R*,3*S*)-*N*-allyl-3-(2-nitrophenoxy)-1-phenylpent-4-yn-2-amine (10a)

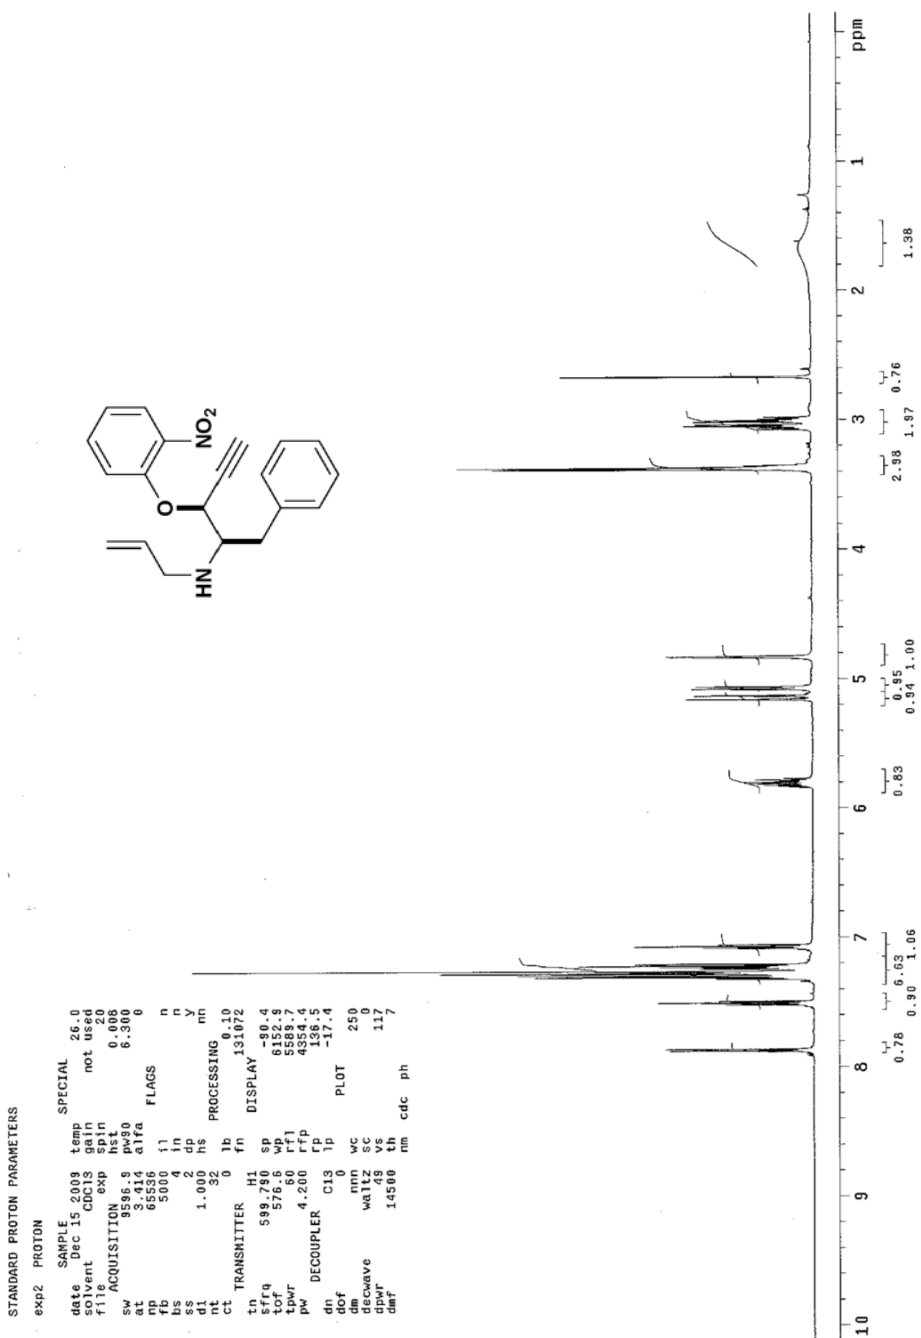

<sup>1</sup>H NMR (600 MHz, CDCl<sub>3</sub>) of compound 10a

STANDARD CARBON PARAMETERS

```

exp2 szpu1
SAMPLE DEC. & VT
date Dec 15 2009 dfrq 499.874
time 12.50.00 dm3 49
file 12.50.00 dpmr 49
ACQUISITION exp 0
sfrq 125.707 dm yxy
at 1.082 dmp 12000
np 55336 dseq
sw 23896.3 dres 1.0
fb not used homo
ts 55 temp 25.0
tavr 4.2 dfrq2 0
d1 2000.0 dn2 1
tof 1580.0 dpmr2 1
ct 5824 dm2 n
atlock not used dmm2 C
gain 10000 dmf2
ll in homo2 1.0
in in homo2 1.0
dp y dfrq3 0
hs DISPLAY dn3 0
sp 1059.4 dof3 1
wp 26510.4 dof3 0
vs 177 dm3 n
sc 0 dmm3 C
sz 0 dm3 10000
h2mm 105.04 dres
is 500.00 dres 1.0
rf1 10766.2 homo3 n
rfp 9676.3 lb PROCESSING
ins 100.000 wf1file ft
nm cdc ph proc fn not used f
math werr
wexp wbs
wnt

```

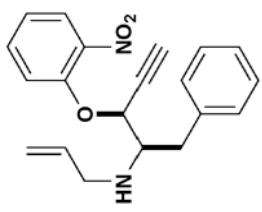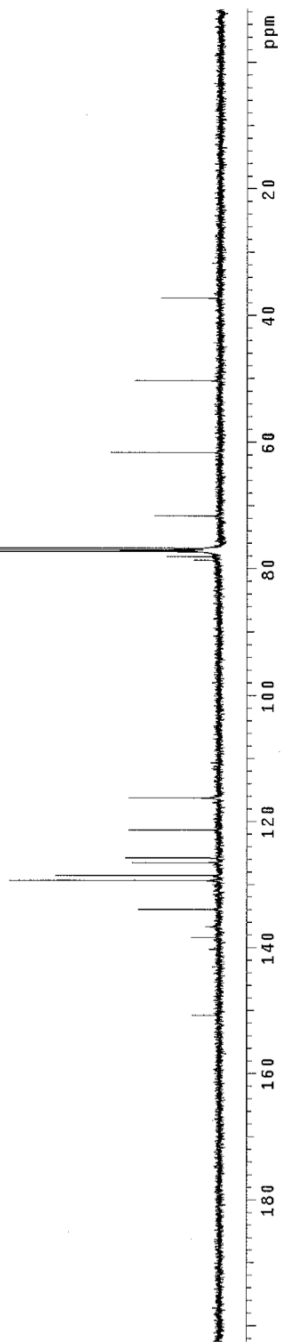

<sup>13</sup>C NMR (126 MHz, CDCl<sub>3</sub>) of compound 10a

Spectral data for (2*R*,3*R*)-*N*-allyl-3-(2-nitrophenoxy)-1-phenylpent-4-yn-2-amine (10b)

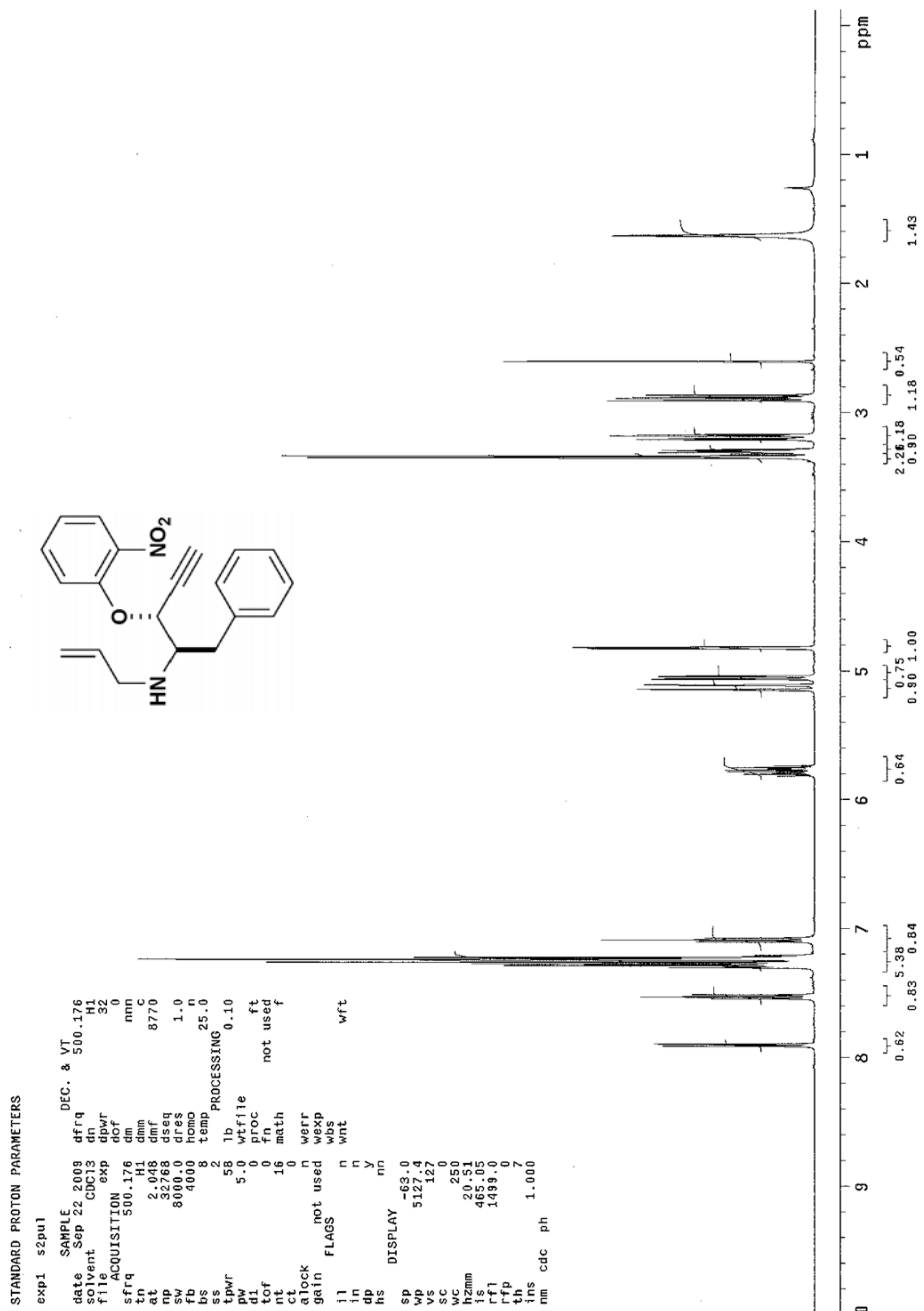

<sup>1</sup>H NMR (500 MHz, CDCl<sub>3</sub>) of compound 10b

STANDARD CARBON PARAMETERS

```

exp8 s2pu1
SAMPLE
date Sep 22 2009 DEC. & VT
dfrq 489.874
dpc 48
file /export/home/~dpcw/
ds4/vnmrSYS/data/1~ dof 0
500c/schreiber/plz~ dm VVY
zitrarr/NO2_108_11~ dmp 12906
C082208.fid dseq
ACQUISITION
sfrq 125.707 dres 1.0 n
tn 1 C13 homo
np 65536 temp 25.0 n
sw 29996.3 lb PROCESSING 1.00
fb not used wtfile
ts 52 proc not used ft
dpc 3.7 math
d1 0
tof 2000.0 werr
ct 2008 wexp
atock 1408 wnt
gain not used
flags n
in n
dp y
hs nh
SP DISPLAY 788.5
wp 26502.1
vs 98
sc 0
vc 250
wmm 106.30
fs 500.00
rf1 10767.1
rfp 9678.3
h1 0
ins 100.000
nm cdc ph

```

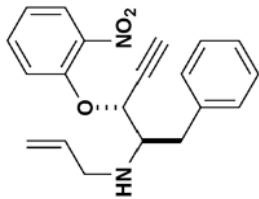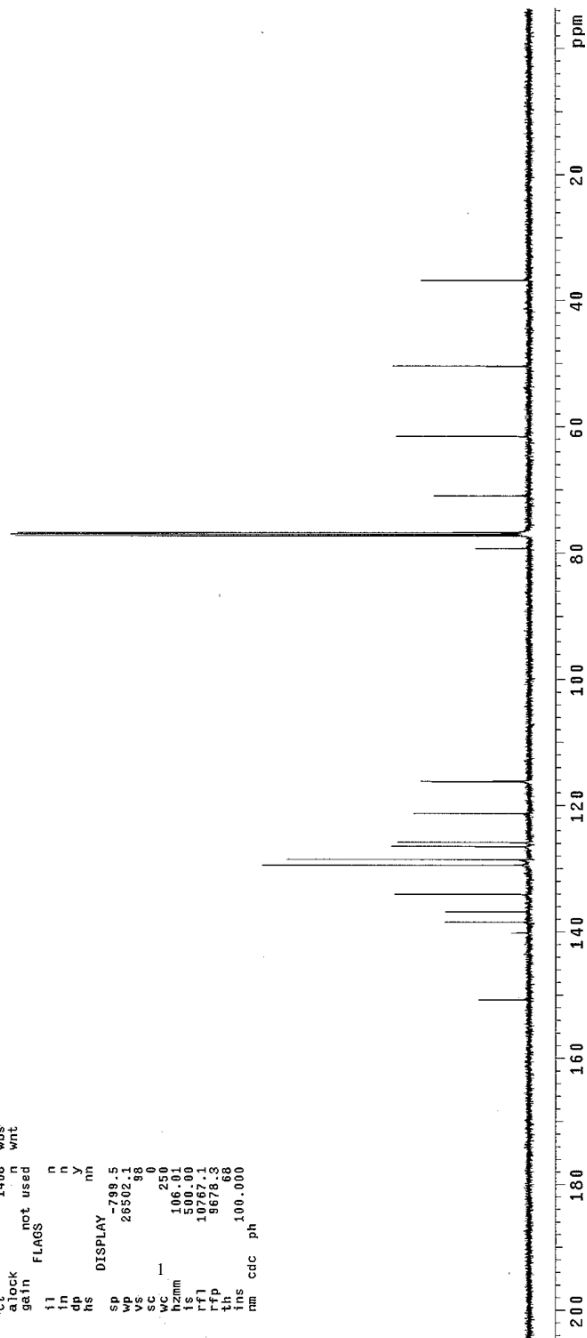

<sup>13</sup>C NMR (126 MHz, CDCl<sub>3</sub>) of compound 10b

Spectral data for (3*R*,4*S*)-3-benzyl-4-ethynyl-2-prop-2-en-1-yl-3,4-dihydro-2*H*-5,1,2-benzoxathiazepine 1,1-dioxide (11a)

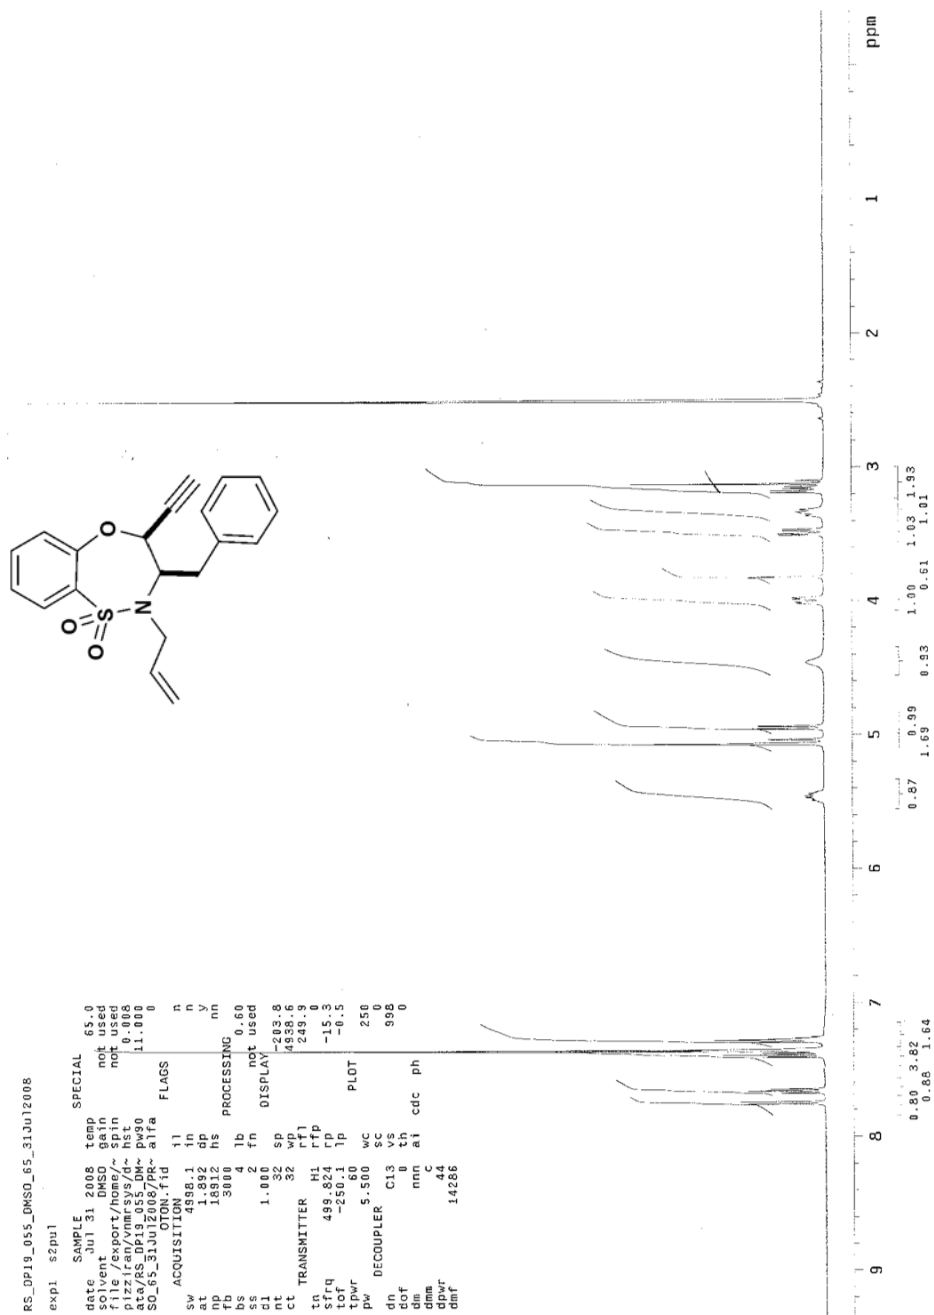

<sup>1</sup>H NMR (500 MHz, DMSO, T = 65 °C) of compound 11a



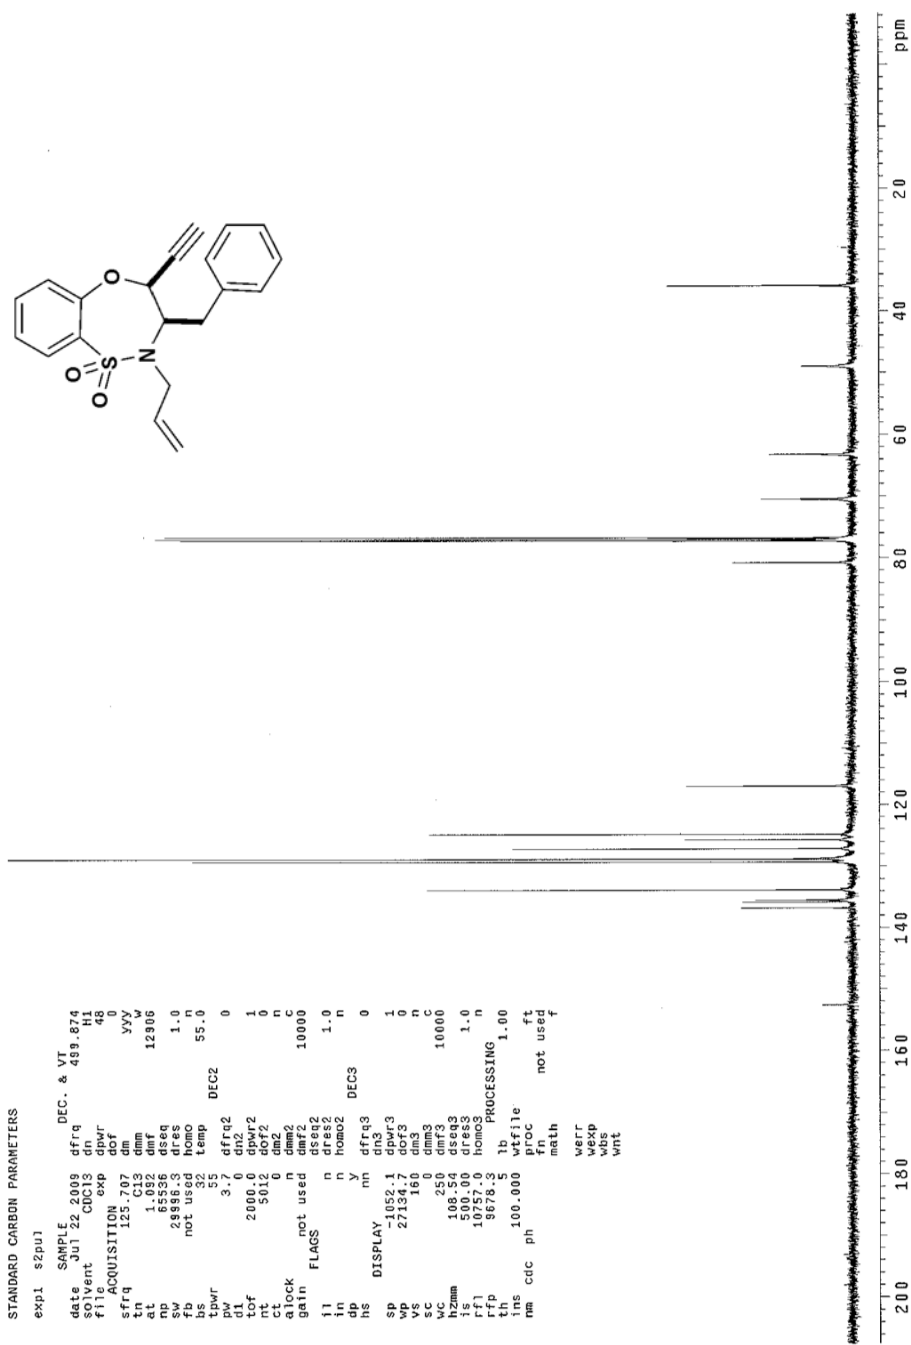

$^{13}\text{C}$  NMR (126 MHz,  $\text{CDCl}_3$ ,  $T = 55\text{ }^\circ\text{C}$ ) of compound **11a**

Spectral data for (3*R*,4*R*)-3-benzyl-4-ethynyl-2-prop-2-en-1-yl-3,4-dihydro-2*H*-5,1,2-benzoxathiazepine 1,1-dioxide (**11b**)

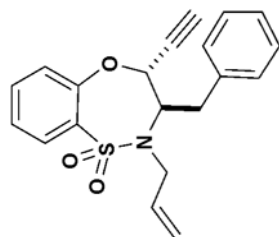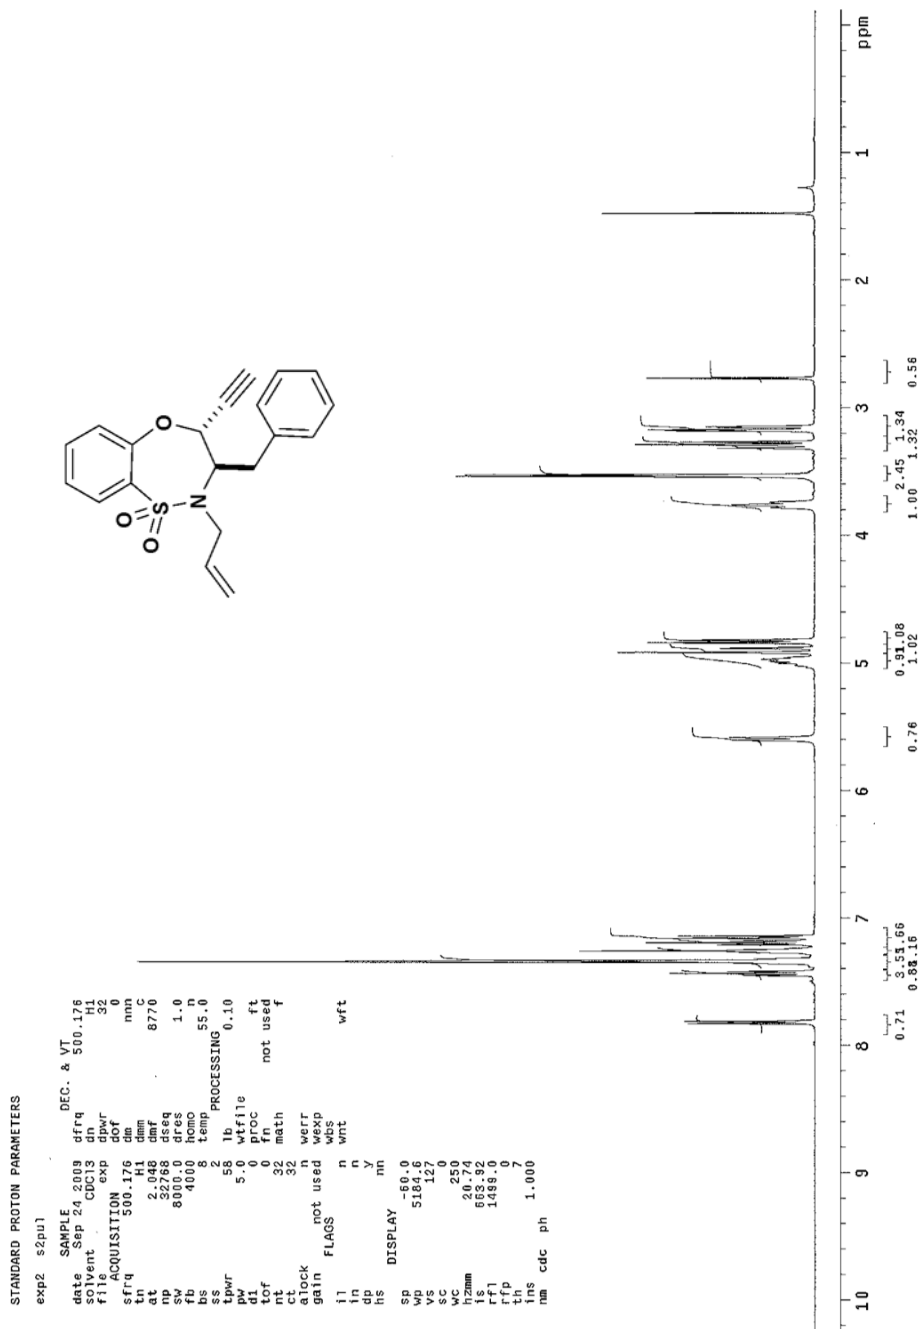

$^1\text{H}$  NMR (500 MHz,  $\text{CDCl}_3$ ,  $T = 55\text{ }^\circ\text{C}$ ) of compound **11b**

STANDARD CARBON PARAMETERS

```

exp1 s2pu1
date 22.2008 dfrq DEC. & VT
solvent Sep CDCl3 dn H1
f1 ACQUISITION 2-sp dnr 40
sfrq 125.707 dm YYY
tn 1.0 C13 dnm 12806
at 55.56 dfrq
sv 29996.3 dres 1.0
fb not used homo n
bs 32 temp 55.0
pwr 3.7 dfrq2 DEC2
d1 3.7 dn2
tof 2000.0 dpwr2 1
rt 5012 dor2 0
st 211n dnm C
stoc not used dm2 10000
gain
flags n n
l1 n homo2 DEC3 1.0
l2 Y
l3 mn dfrq3 0
hs
sp DISPLAY dn3 0
vs 1846.5 dpwr3 1
vs 26443.5 dnr3 0
vs 86 dms n
sc 0 dnm3 C
wc 105250 dmF3 10000
ls 500.00 dres3
rfi 10754.3 homo3 1.0
rff 9678.3
tr 68
trc 100.000 proc ft
mm cdc ph fn not used
math werr
wexp wbs
wnt
  
```

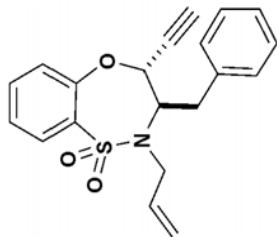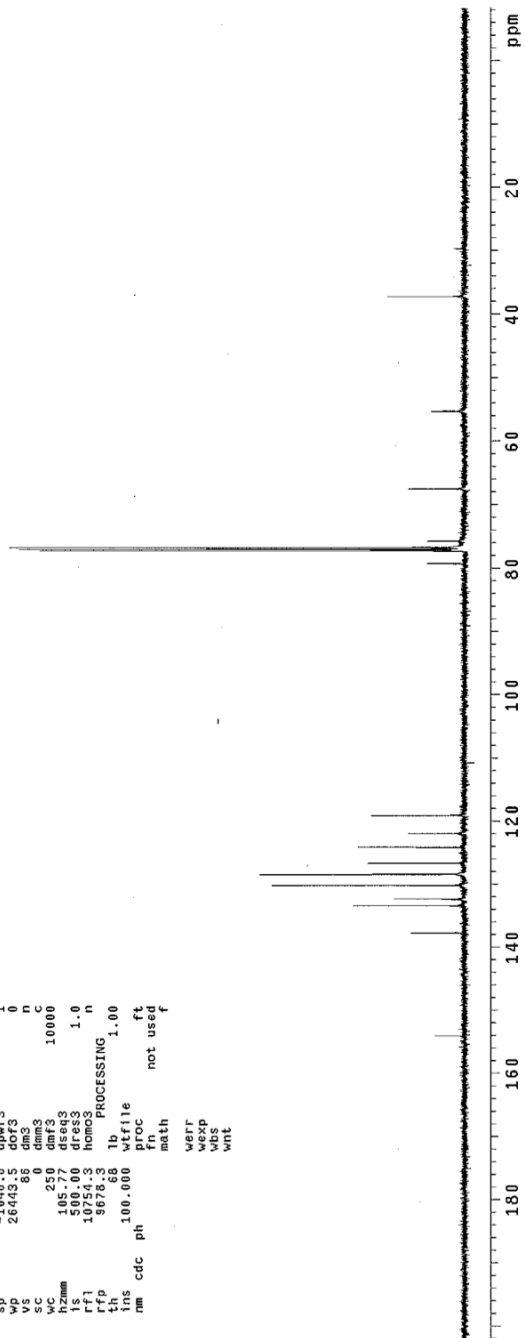

<sup>13</sup>C NMR (126 MHz, CDCl<sub>3</sub>, T = 55 °C) of compound **11b**

Spectral data for (3*R*,4*S*)-3-benzyl-4-(1-methyleneprop-2-en-1-yl)-2-prop-2-en-1-yl-3,4-dihydro-2*H*-5,1,2-benzoxathiazepine (12a)

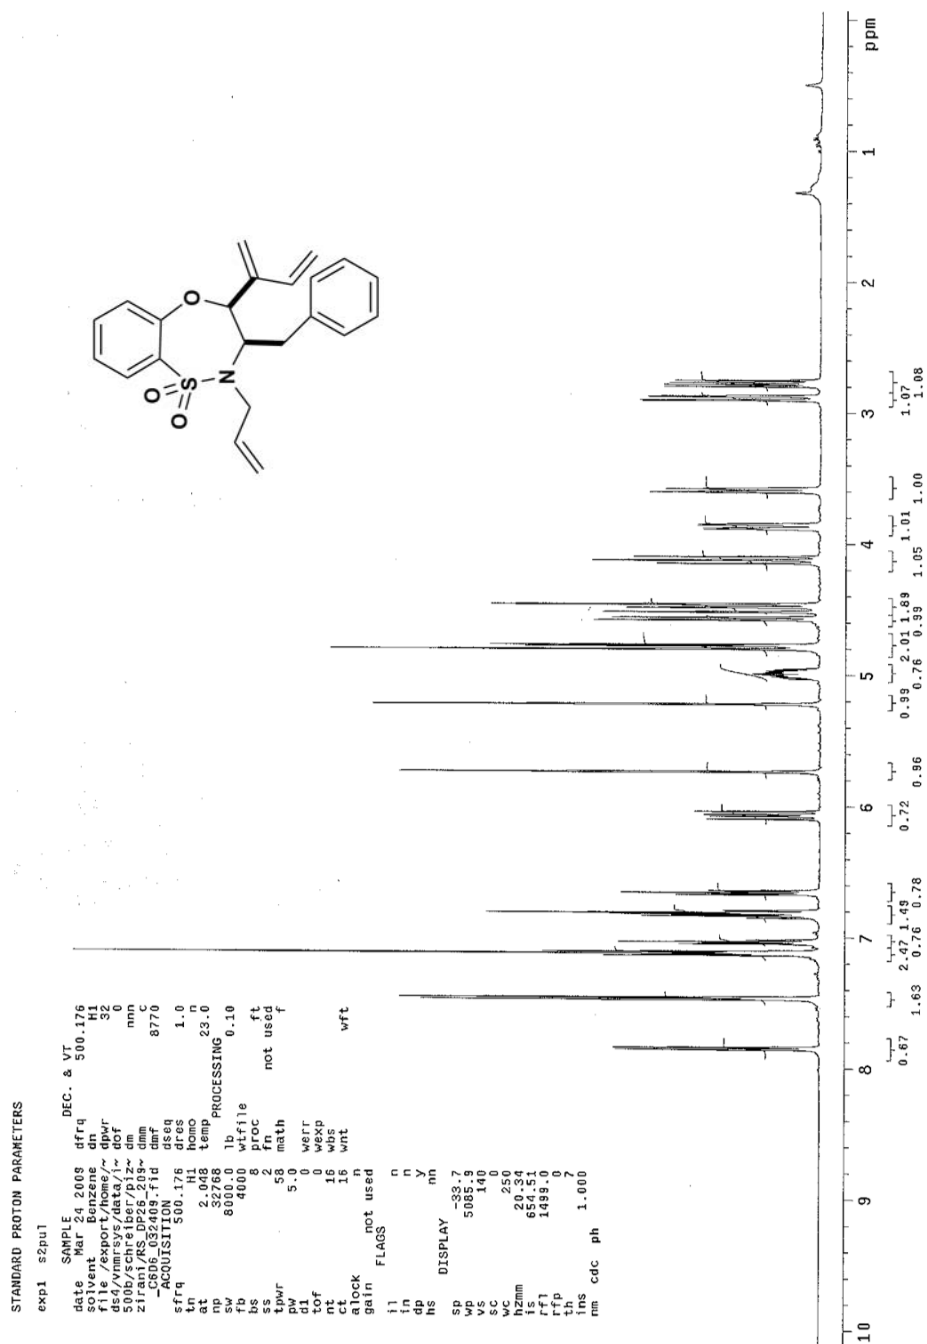

<sup>1</sup>H NMR (500 MHz, Benzene) of compound 12a

STANDARD CARBON PARAMETERS

```

exp4 s2pu1
SAMPLE
date Mar 22 2009 dfrq DEC. & VT
solvent CDC13 dn 500.175
file /export/home/~ dpwr 38
dsc/vmrxy/data/~ dor 0
ziran/rs dp26 208- dim 15670
032209 fid dmf
ACQUISITION
sfrq 125.251 dseq 1.0
at 1.170 pres 23.0
np 65536 lb 1.00
sw 28001.4 lb 1.00
bs 15008 wpc file
ps 57 pcc not used
tpwr 8.10 math
di 0.100 wscr
nt 1000 wexp
ct 1000 wbs
gain 56 wnt
FLAGS
f1 in
f2 in
f3 in
f4 in
f5 in
f6 in
f7 in
f8 in
f9 in
f10 in
f11 in
f12 in
f13 in
f14 in
f15 in
f16 in
f17 in
f18 in
f19 in
f20 in
f21 in
f22 in
f23 in
f24 in
f25 in
f26 in
f27 in
f28 in
f29 in
f30 in
f31 in
f32 in
f33 in
f34 in
f35 in
f36 in
f37 in
f38 in
f39 in
f40 in
f41 in
f42 in
f43 in
f44 in
f45 in
f46 in
f47 in
f48 in
f49 in
f50 in
f51 in
f52 in
f53 in
f54 in
f55 in
f56 in
f57 in
f58 in
f59 in
f60 in
f61 in
f62 in
f63 in
f64 in
f65 in
f66 in
f67 in
f68 in
f69 in
f70 in
f71 in
f72 in
f73 in
f74 in
f75 in
f76 in
f77 in
f78 in
f79 in
f80 in
f81 in
f82 in
f83 in
f84 in
f85 in
f86 in
f87 in
f88 in
f89 in
f90 in
f91 in
f92 in
f93 in
f94 in
f95 in
f96 in
f97 in
f98 in
f99 in
f100 in
f101 in
f102 in
f103 in
f104 in
f105 in
f106 in
f107 in
f108 in
f109 in
f110 in
f111 in
f112 in
f113 in
f114 in
f115 in
f116 in
f117 in
f118 in
f119 in
f120 in
f121 in
f122 in
f123 in
f124 in
f125 in
f126 in
f127 in
f128 in
f129 in
f130 in
f131 in
f132 in
f133 in
f134 in
f135 in
f136 in
f137 in
f138 in
f139 in
f140 in
f141 in
f142 in
f143 in
f144 in
f145 in
f146 in
f147 in
f148 in
f149 in
f150 in
f151 in
f152 in
f153 in
f154 in
f155 in
f156 in
f157 in
f158 in
f159 in
f160 in
f161 in
f162 in
f163 in
f164 in
f165 in
f166 in
f167 in
f168 in
f169 in
f170 in
f171 in
f172 in
f173 in
f174 in
f175 in
f176 in
f177 in
f178 in
f179 in
f180 in
f181 in
f182 in
f183 in
f184 in
f185 in
f186 in
f187 in
f188 in
f189 in
f190 in
f191 in
f192 in
f193 in
f194 in
f195 in
f196 in
f197 in
f198 in
f199 in
f200 in
f201 in
f202 in
f203 in
f204 in
f205 in
f206 in
f207 in
f208 in
f209 in
f210 in
f211 in
f212 in
f213 in
f214 in
f215 in
f216 in
f217 in
f218 in
f219 in
f220 in
f221 in
f222 in
f223 in
f224 in
f225 in
f226 in
f227 in
f228 in
f229 in
f230 in
f231 in
f232 in
f233 in
f234 in
f235 in
f236 in
f237 in
f238 in
f239 in
f240 in
f241 in
f242 in
f243 in
f244 in
f245 in
f246 in
f247 in
f248 in
f249 in
f250 in
f251 in
f252 in
f253 in
f254 in
f255 in
f256 in
f257 in
f258 in
f259 in
f260 in
f261 in
f262 in
f263 in
f264 in
f265 in
f266 in
f267 in
f268 in
f269 in
f270 in
f271 in
f272 in
f273 in
f274 in
f275 in
f276 in
f277 in
f278 in
f279 in
f280 in
f281 in
f282 in
f283 in
f284 in
f285 in
f286 in
f287 in
f288 in
f289 in
f290 in
f291 in
f292 in
f293 in
f294 in
f295 in
f296 in
f297 in
f298 in
f299 in
f300 in
f301 in
f302 in
f303 in
f304 in
f305 in
f306 in
f307 in
f308 in
f309 in
f310 in
f311 in
f312 in
f313 in
f314 in
f315 in
f316 in
f317 in
f318 in
f319 in
f320 in
f321 in
f322 in
f323 in
f324 in
f325 in
f326 in
f327 in
f328 in
f329 in
f330 in
f331 in
f332 in
f333 in
f334 in
f335 in
f336 in
f337 in
f338 in
f339 in
f340 in
f341 in
f342 in
f343 in
f344 in
f345 in
f346 in
f347 in
f348 in
f349 in
f350 in
f351 in
f352 in
f353 in
f354 in
f355 in
f356 in
f357 in
f358 in
f359 in
f360 in
f361 in
f362 in
f363 in
f364 in
f365 in
f366 in
f367 in
f368 in
f369 in
f370 in
f371 in
f372 in
f373 in
f374 in
f375 in
f376 in
f377 in
f378 in
f379 in
f380 in
f381 in
f382 in
f383 in
f384 in
f385 in
f386 in
f387 in
f388 in
f389 in
f390 in
f391 in
f392 in
f393 in
f394 in
f395 in
f396 in
f397 in
f398 in
f399 in
f400 in
f401 in
f402 in
f403 in
f404 in
f405 in
f406 in
f407 in
f408 in
f409 in
f410 in
f411 in
f412 in
f413 in
f414 in
f415 in
f416 in
f417 in
f418 in
f419 in
f420 in
f421 in
f422 in
f423 in
f424 in
f425 in
f426 in
f427 in
f428 in
f429 in
f430 in
f431 in
f432 in
f433 in
f434 in
f435 in
f436 in
f437 in
f438 in
f439 in
f440 in
f441 in
f442 in
f443 in
f444 in
f445 in
f446 in
f447 in
f448 in
f449 in
f450 in
f451 in
f452 in
f453 in
f454 in
f455 in
f456 in
f457 in
f458 in
f459 in
f460 in
f461 in
f462 in
f463 in
f464 in
f465 in
f466 in
f467 in
f468 in
f469 in
f470 in
f471 in
f472 in
f473 in
f474 in
f475 in
f476 in
f477 in
f478 in
f479 in
f480 in
f481 in
f482 in
f483 in
f484 in
f485 in
f486 in
f487 in
f488 in
f489 in
f490 in
f491 in
f492 in
f493 in
f494 in
f495 in
f496 in
f497 in
f498 in
f499 in
f500 in
f501 in
f502 in
f503 in
f504 in
f505 in
f506 in
f507 in
f508 in
f509 in
f510 in
f511 in
f512 in
f513 in
f514 in
f515 in
f516 in
f517 in
f518 in
f519 in
f520 in
f521 in
f522 in
f523 in
f524 in
f525 in
f526 in
f527 in
f528 in
f529 in
f530 in
f531 in
f532 in
f533 in
f534 in
f535 in
f536 in
f537 in
f538 in
f539 in
f540 in
f541 in
f542 in
f543 in
f544 in
f545 in
f546 in
f547 in
f548 in
f549 in
f550 in
f551 in
f552 in
f553 in
f554 in
f555 in
f556 in
f557 in
f558 in
f559 in
f560 in
f561 in
f562 in
f563 in
f564 in
f565 in
f566 in
f567 in
f568 in
f569 in
f570 in
f571 in
f572 in
f573 in
f574 in
f575 in
f576 in
f577 in
f578 in
f579 in
f580 in
f581 in
f582 in
f583 in
f584 in
f585 in
f586 in
f587 in
f588 in
f589 in
f590 in
f591 in
f592 in
f593 in
f594 in
f595 in
f596 in
f597 in
f598 in
f599 in
f600 in
f601 in
f602 in
f603 in
f604 in
f605 in
f606 in
f607 in
f608 in
f609 in
f610 in
f611 in
f612 in
f613 in
f614 in
f615 in
f616 in
f617 in
f618 in
f619 in
f620 in
f621 in
f622 in
f623 in
f624 in
f625 in
f626 in
f627 in
f628 in
f629 in
f630 in
f631 in
f632 in
f633 in
f634 in
f635 in
f636 in
f637 in
f638 in
f639 in
f640 in
f641 in
f642 in
f643 in
f644 in
f645 in
f646 in
f647 in
f648 in
f649 in
f650 in
f651 in
f652 in
f653 in
f654 in
f655 in
f656 in
f657 in
f658 in
f659 in
f660 in
f661 in
f662 in
f663 in
f664 in
f665 in
f666 in
f667 in
f668 in
f669 in
f670 in
f671 in
f672 in
f673 in
f674 in
f675 in
f676 in
f677 in
f678 in
f679 in
f680 in
f681 in
f682 in
f683 in
f684 in
f685 in
f686 in
f687 in
f688 in
f689 in
f690 in
f691 in
f692 in
f693 in
f694 in
f695 in
f696 in
f697 in
f698 in
f699 in
f700 in
f701 in
f702 in
f703 in
f704 in
f705 in
f706 in
f707 in
f708 in
f709 in
f710 in
f711 in
f712 in
f713 in
f714 in
f715 in
f716 in
f717 in
f718 in
f719 in
f720 in
f721 in
f722 in
f723 in
f724 in
f725 in
f726 in
f727 in
f728 in
f729 in
f730 in
f731 in
f732 in
f733 in
f734 in
f735 in
f736 in
f737 in
f738 in
f739 in
f740 in
f741 in
f742 in
f743 in
f744 in
f745 in
f746 in
f747 in
f748 in
f749 in
f750 in
f751 in
f752 in
f753 in
f754 in
f755 in
f756 in
f757 in
f758 in
f759 in
f760 in
f761 in
f762 in
f763 in
f764 in
f765 in
f766 in
f767 in
f768 in
f769 in
f770 in
f771 in
f772 in
f773 in
f774 in
f775 in
f776 in
f777 in
f778 in
f779 in
f780 in
f781 in
f782 in
f783 in
f784 in
f785 in
f786 in
f787 in
f788 in
f789 in
f790 in
f791 in
f792 in
f793 in
f794 in
f795 in
f796 in
f797 in
f798 in
f799 in
f800 in
f801 in
f802 in
f803 in
f804 in
f805 in
f806 in
f807 in
f808 in
f809 in
f810 in
f811 in
f812 in
f813 in
f814 in
f815 in
f816 in
f817 in
f818 in
f819 in
f820 in
f821 in
f822 in
f823 in
f824 in
f825 in
f826 in
f827 in
f828 in
f829 in
f830 in
f831 in
f832 in
f833 in
f834 in
f835 in
f836 in
f837 in
f838 in
f839 in
f840 in
f841 in
f842 in
f843 in
f844 in
f845 in
f846 in
f847 in
f848 in
f849 in
f850 in
f851 in
f852 in
f853 in
f854 in
f855 in
f856 in
f857 in
f858 in
f859 in
f860 in
f861 in
f862 in
f863 in
f864 in
f865 in
f866 in
f867 in
f868 in
f869 in
f870 in
f871 in
f872 in
f873 in
f874 in
f875 in
f876 in
f877 in
f878 in
f879 in
f880 in
f881 in
f882 in
f883 in
f884 in
f885 in
f886 in
f887 in
f888 in
f889 in
f890 in
f891 in
f892 in
f893 in
f894 in
f895 in
f896 in
f897 in
f898 in
f899 in
f900 in
f901 in
f902 in
f903 in
f904 in
f905 in
f906 in
f907 in
f908 in
f909 in
f910 in
f911 in
f912 in
f913 in
f914 in
f915 in
f916 in
f917 in
f918 in
f919 in
f920 in
f921 in
f922 in
f923 in
f924 in
f925 in
f926 in
f927 in
f928 in
f929 in
f930 in
f931 in
f932 in
f933 in
f934 in
f935 in
f936 in
f937 in
f938 in
f939 in
f940 in
f941 in
f942 in
f943 in
f944 in
f945 in
f946 in
f947 in
f948 in
f949 in
f950 in
f951 in
f952 in
f953 in
f954 in
f955 in
f956 in
f957 in
f958 in
f959 in
f960 in
f961 in
f962 in
f963 in
f964 in
f965 in
f966 in
f967 in
f968 in
f969 in
f970 in
f971 in
f972 in
f973 in
f974 in
f975 in
f976 in
f977 in
f978 in
f979 in
f980 in
f981 in
f982 in
f983 in
f984 in
f985 in
f986 in
f987 in
f988 in
f989 in
f990 in
f991 in
f992 in
f993 in
f994 in
f995 in
f996 in
f997 in
f998 in
f999 in
f1000 in
    
```

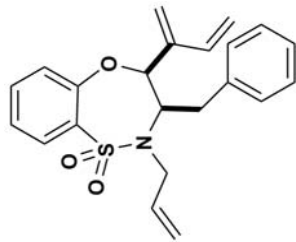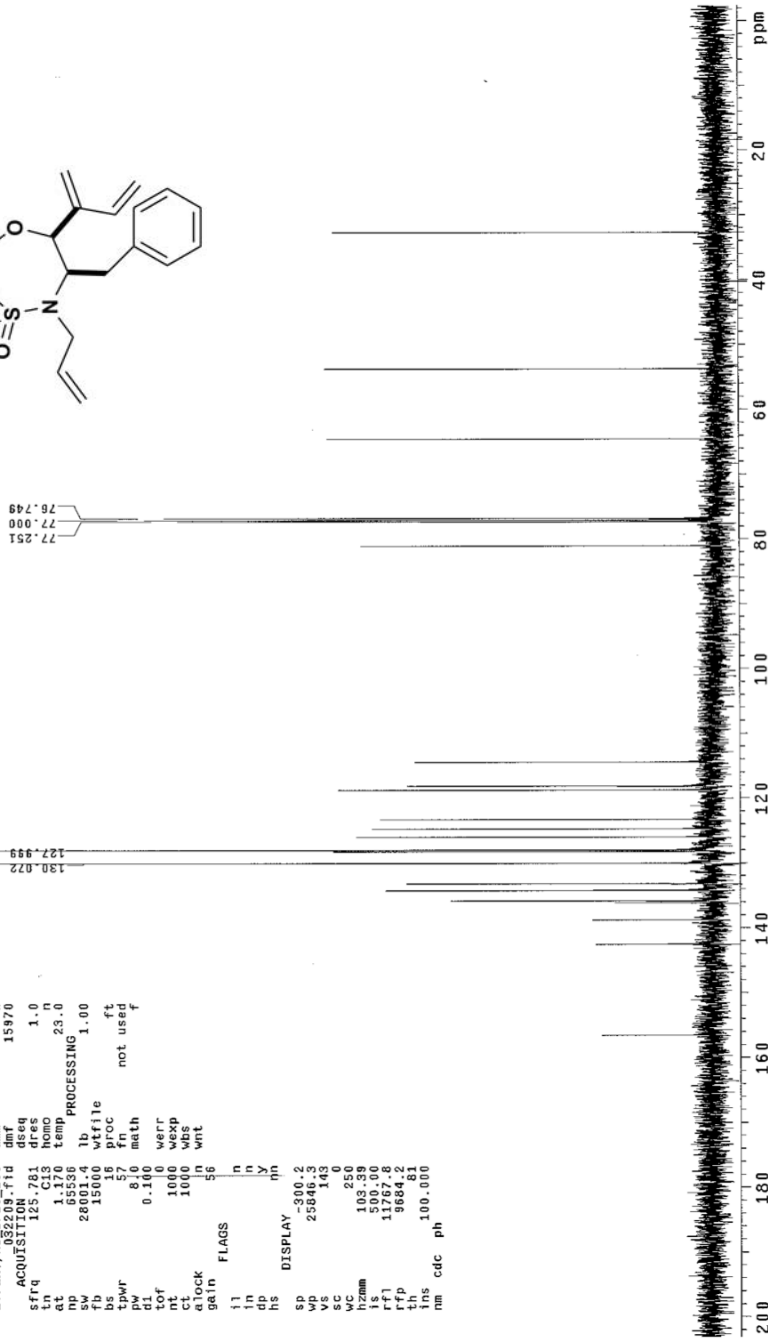

<sup>13</sup>C NMR (126 MHz, CDCl<sub>3</sub>) of compound 12a

Spectral data for (3*R*,4*R*)-3-benzyl-4-(1-methylideneprop-2-en-1-yl)-2-prop-2-en-1-yl-3,4-dihydro-2*H*-5,1,2-benzoxathiazepine (**12b**)

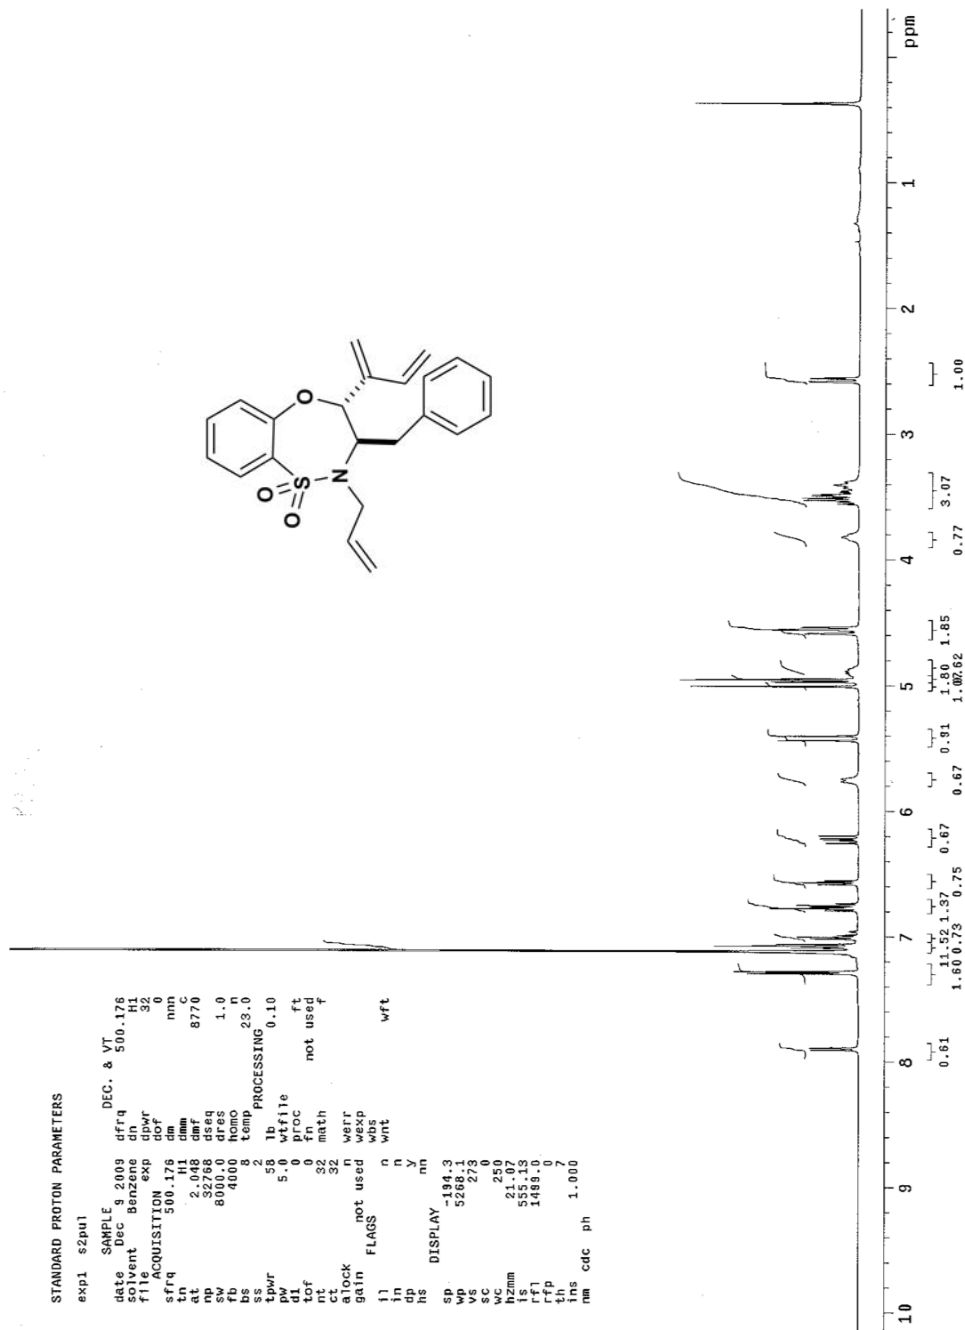

<sup>1</sup>H NMR (500 MHz, Benzene) of compound **12b**

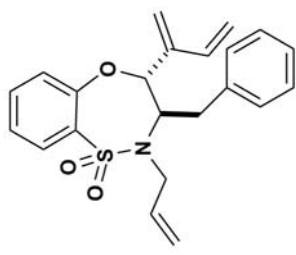

STANDARD CARBON PARAMETERS

```

exp1 szpu1
SAMPLE
date Dec 2009 dfrq DEC. & VT 500.176
solvent CDCl3 dm dec 38
fl ACQUISITION exp dcf 0
sfrq 125.781 dm xvy 15970
tn 1.013 dnm
np 65596 dresq
sw 28001.4 dres 1.0
fb 15000 homo
ts 57 temp PROCESSING 23.0
pw 8.70 lb wtfile 1.00
d1 0.100 wfile ft
tcf 100000 proc
ct 28304 fn not used
atlock math
gain 56 werr
il n wexp
in n
dp y wht
hs DISPLAY mn
SP -65.8
WP 25697.8
VS 188
SC 0
WC 250
IS 500.00
rfl 11766.1
rfp 9684.2
rfs 100.00
nm cdc ph
  
```

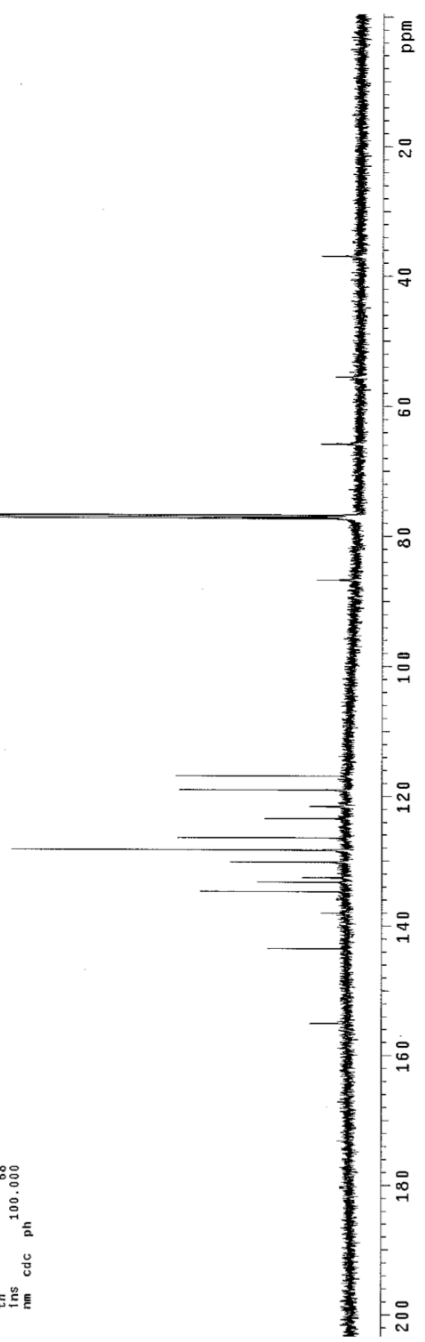

<sup>13</sup>C NMR (126 MHz, CDCl<sub>3</sub>) of compound **12b**

Spectral data for (10*R*,14*S*)-14-benzyl-11-ethenyl-9-oxa-2-thia-1-azatricyclo[8.3.1.0<sup>3,8</sup>]tetradeca-3,5,7,11-tetraene 2,2-dioxide (13a)

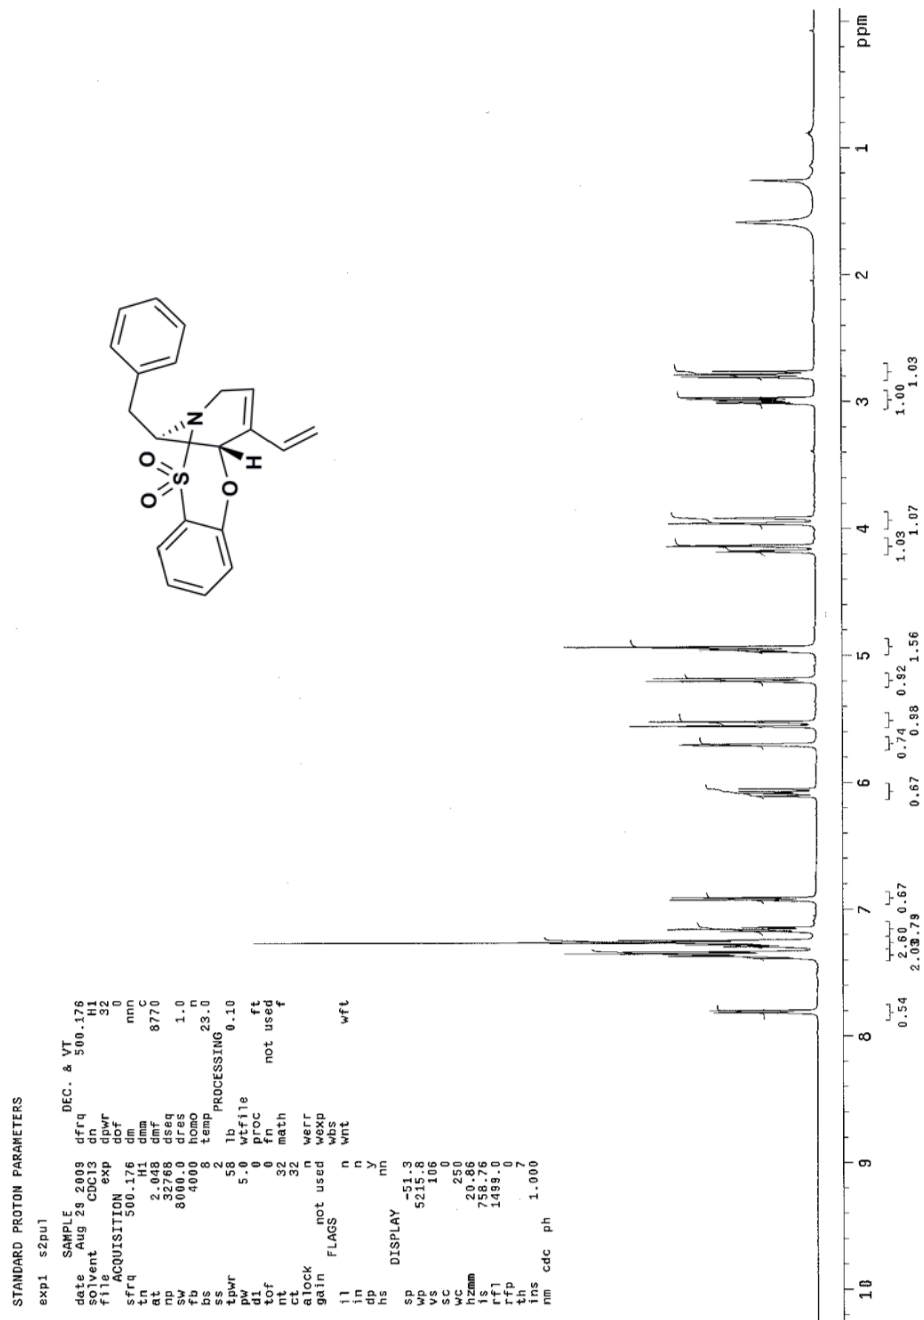

<sup>1</sup>H NMR (500 MHz, CDCl<sub>3</sub>) of compound **13a**



STANDARD CARBON PARAMETERS

```

exp2 s2pu1
SAMPLE DEC. & VT
date Aug 28 2008 dfrq 439.874
solvent CDCl3 dn H1
file exp 48
ACQUISITION exp dpr 0
sfrq 125.707 dpr 0
trq 125.707 dm 399
at 1.082 dmf 12306
np 65836 dseq 1.0
sw 29996.3 dres 1.0
bs not used temp 25.0
tpwr 55 DEC2
pw 3.7 dfrq2 0
td 2000.0 dnr2 1
ct 2648 doff2 0
nl 0 dm2 n
gain not used dm2 10000
alock
il not used dres2 1.0
in n homo2 n
hs y dfrq3 0
DISPLAY dn3 0
SP -1086.9 dpwr3 1
WP 26426.1 doff3 0
VS 165 dm3 n
WC 250 dm3 10000
hzmm 185.70 dseq3 1.0
is 500.00 dres3 1.0
rf 18678.3 homo3
rfp 3878.5 lb PROCESSING n
tpr 100.000 wfile 1.00
nm cdc ph proc not used
math
werr
wexp
wps
wnt

```

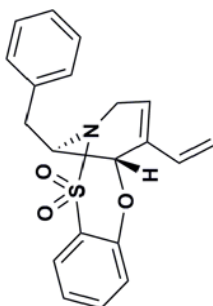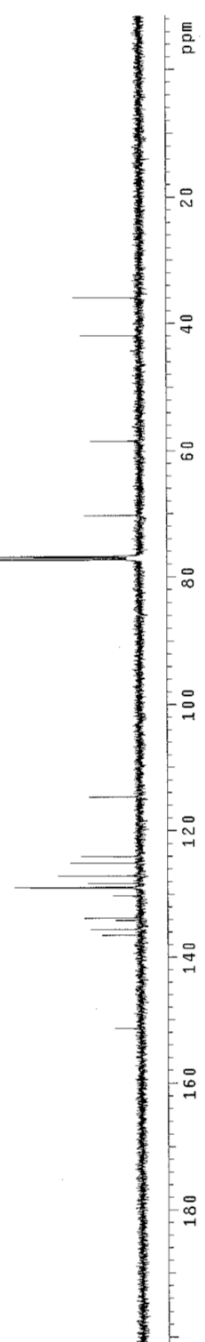

<sup>13</sup>C NMR (126 MHz, CDCl<sub>3</sub>) of compound 13a

Spectral data for (10*R*,14*R*)-14-benzyl-11-ethenyl-9-oxa-2-thia-1-azatricyclo[8.3.1.0<sup>3,8</sup>]tetradeca-3,5,7,11-tetraene 2,2-dioxide (13b)

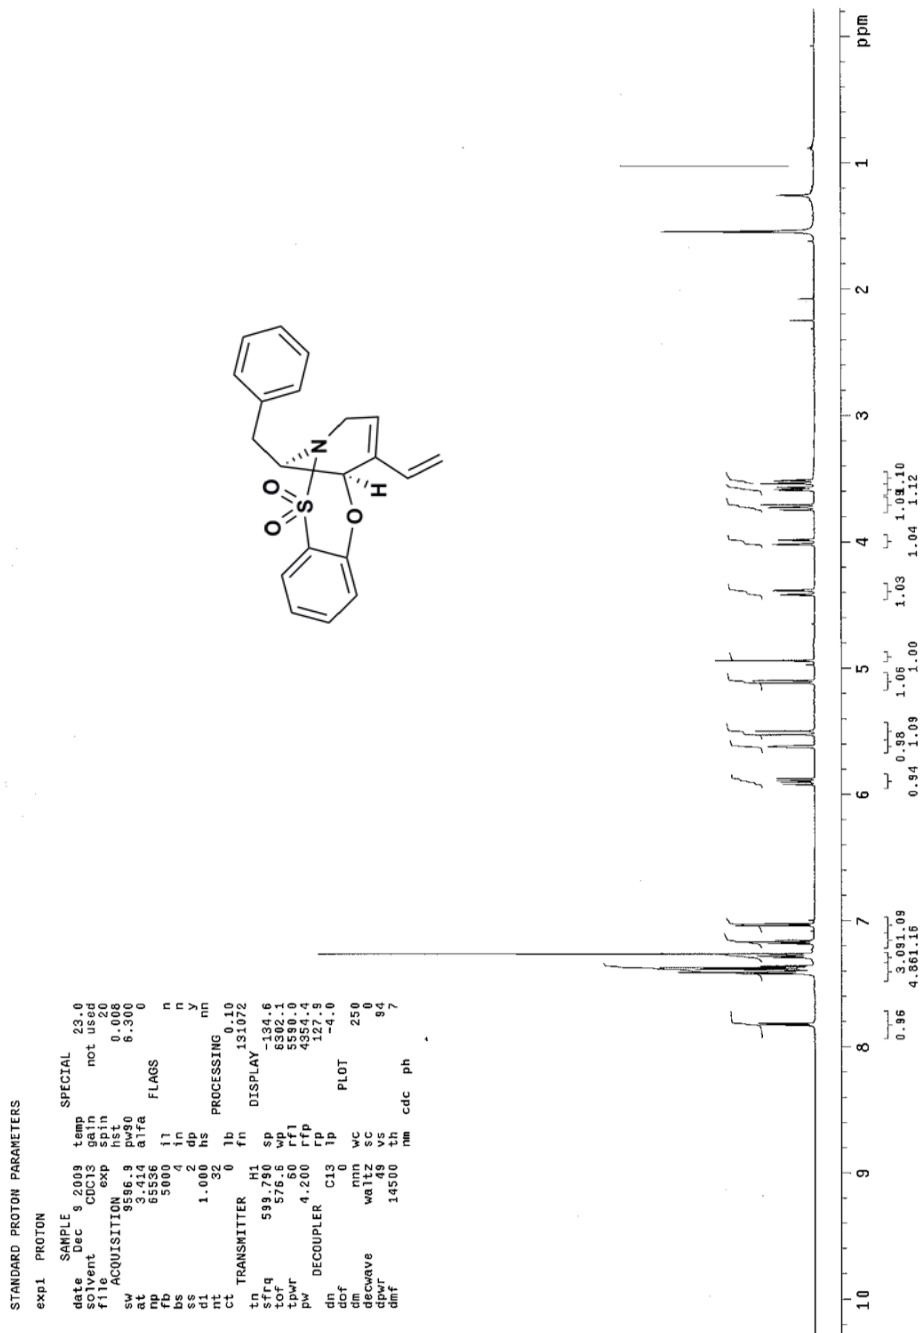

<sup>1</sup>H NMR (600 MHz, CDCl<sub>3</sub>) of compound **13b**

STANDARD CARBON PARAMETERS

```

exp1 s2pu1
date SAMPLE 2009 DEC. & WT
dec 9 CDC13 489.874
solvent CDC13 dn H1
file CDC13 exp 49
ACQUISITION exp dof 0
frq 125.707 dm yy
at 1.082 dmf 12000
np 65536 dseq 1.0
sw 29336.3 dres 1.0
to 0.000 dtemp 25.0
bs not used tump DEC2
tpwr 55
pv 4.2 dfrq2 0
dl 0 dn2 0
df 2000.0 dfr 1
nt 10000 dof2 0
ct 5728 dm2 n
alock n dm2 10000 C
gain not used dfr2
flags n dres2 1.0
ll n homo2 n
in n homo2 DEC3
dp n y dfrq3 0
hs DISPLAY nm dfr3 0
sp -1058.5 dpwr3 1
wp 26731.9 dofs 0
ve 230 dms n
vc 0 dms 10000
wc 250 dms3
hzmm 106.83 dseq3
is 500.00 dres3 1.0
rfi 10766.2 homo3
rfp 3676.1 lb PROCESSING n
tfr 11 lb 1.00
ins 100.000 wfile
nm cdc ph proc ft
in math not used
werr
wexp
wps
wnt

```

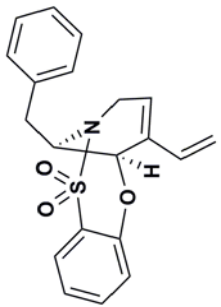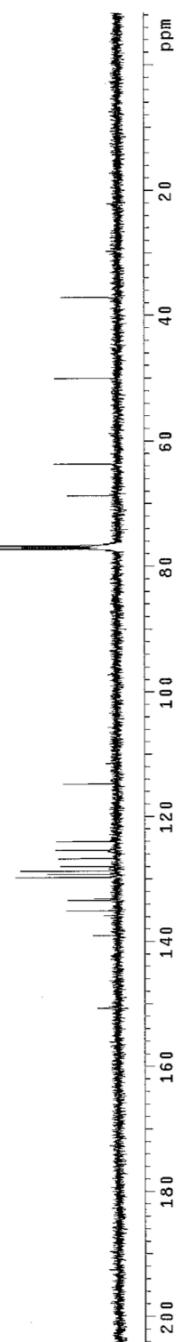

<sup>13</sup>C NMR (126 MHz, CDCl<sub>3</sub>) of compound 13b

Spectral data for compound (14a)

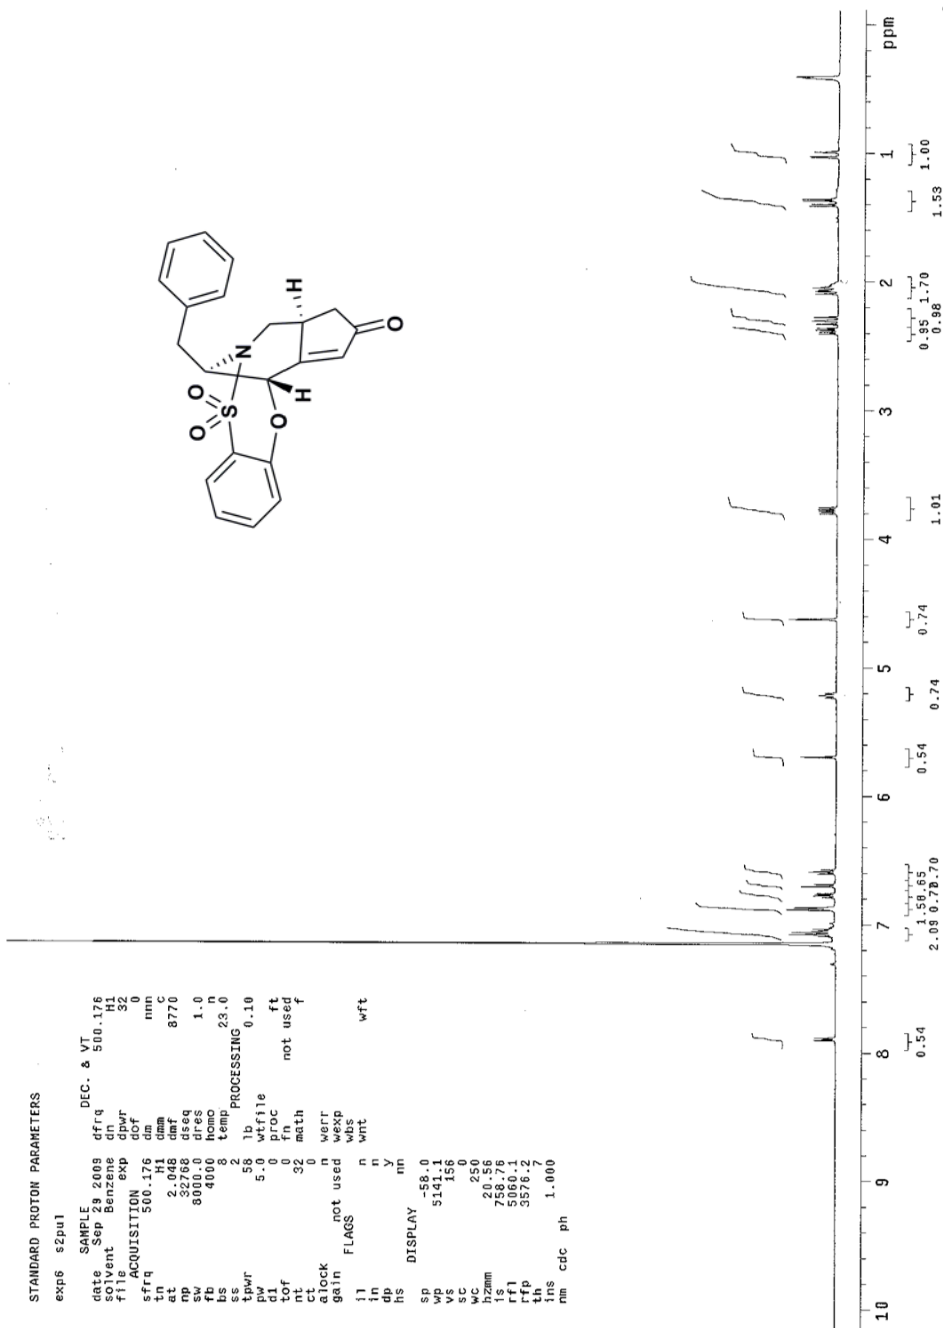

<sup>1</sup>H NMR (500 MHz, Benzene) of compound 14a

STANDARD CARBON PARAMETERS

```

exps s2pu1
SAMPLE DEC. & VT
date Oct 5 2009 dfrq 489.874
solvent CDCl3 dnu H1
f1 ACQ dnr 0
ACQUISITION EXP dof 0
sfrq 125.787 dm vvy W
t1 1 C13 dnm 12906
rt 65536 dfrq
sw 29986.9 dres 1.0
fb not used homo n
bs S2 temp DEC2 25.0
lpwr S7 dfrq2 0
d1 0 dnt 0
tof 2000.0 dper2 1
nt 10000 dcz 0
c S10 n
alock c
gain not used
flags dseq2 10000
l1 n dse2 1.0
l2 n homo2 1.0
dp Y homo3 0
hs n dfrq3 0
SP DISPLAY 1081.8 dnu3 1
VS 27891.8 dper3 0
VS 288 dnc3 0
SC 0 dnm3 C
WC 11.250 dmF3 10000
Hzmm 500.130 dres3 1.0
rf1 10766.2 homo3 n
rfp 8878.3 PROCESSING
th 100.000 1.00
ms cdc ph
nm cdc ph
proc not used
fn math
werr wexp
wbs wnt

```

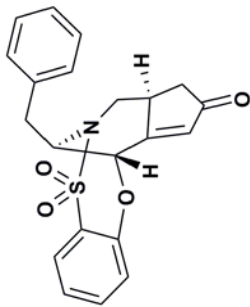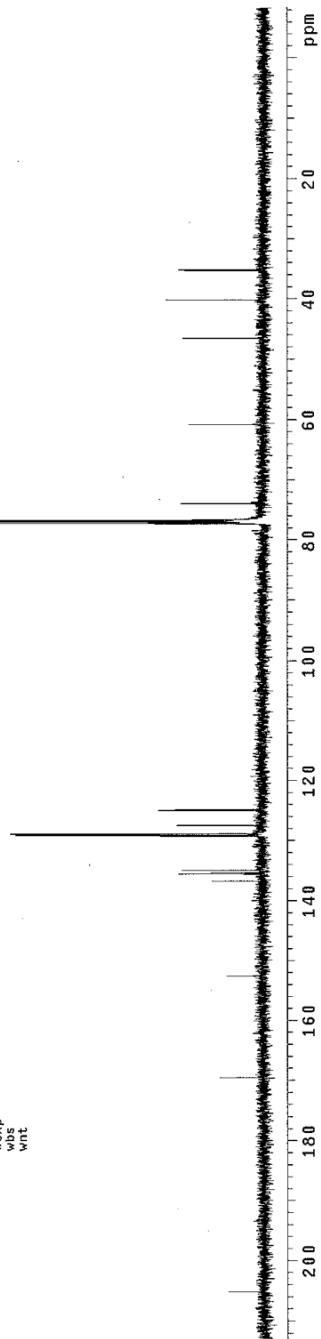

<sup>13</sup>C NMR (126 MHz, CDCl<sub>3</sub>) of compound 14a

#### IV. X-Ray structures for compounds 11a, 13a and 14a

##### X-Ray structure of compound 11a (CCDC 768364)

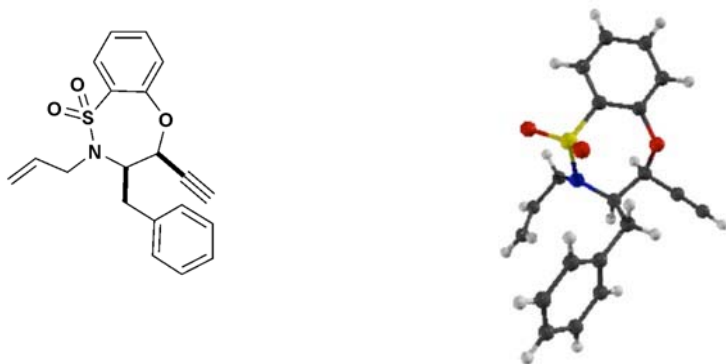

##### X-Ray structure of compound 13a (CCDC 768365)

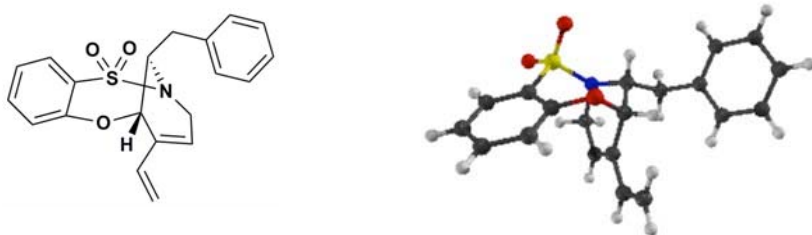

##### X-Ray structure of compound 14a (CCDC 768366)

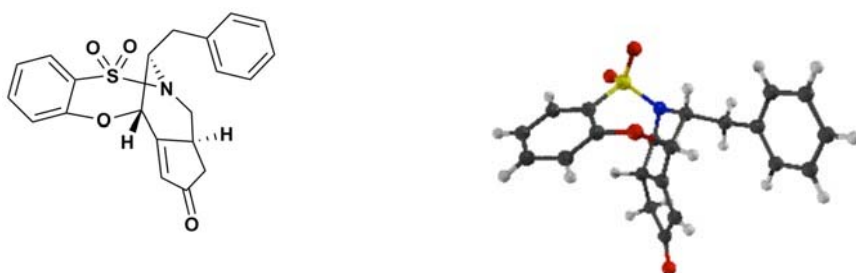

Supplement: ol100914b_si_001.pdf [file ol100914b_si_001.pdf]
